# Supplementary material for: Sequential nucleophilic substitution of pseudorotaxanes forms rotaxanes with various linking functionalities and recycling of the surrogate stopper
Source: Royal Society of Chemistry journal article supplement (doi:10.1039/d4cc02975e), 2024-01-01

# *Supplementary Material*

## **Sequential Nucleophilic Substitution of Pseudorotaxanes Forms Rotaxanes with Various Linking Functionalities and Recycling of the Surrogate Stopper**

Chun-Tung Chang and Sheng-Hsien Chiu\*

| Data                                                                                         | Page Number |
|----------------------------------------------------------------------------------------------|-------------|
| Experimental procedures and characterization data for new compounds                          | S2–S15      |
| $^1\text{H}$ and $^{13}\text{C}$ NMR spectra of the rotaxanes and their synthetic precursors | S16–S78     |

**General Methods.** All stirrer bars, syringes, needles, and glassware were either heat gun- or oven-dried before use. Unless otherwise indicated, all chemicals were obtained from commercial sources. Reactions were performed under an inert atmosphere of Ar or N<sub>2</sub>. Reactions conducted at elevated temperatures were performed using an oil bath as the heating apparatus. Thin-layer chromatography (TLC) was conducted using Merck Art. 5715 silica gel with a thickness of 0.25 mm. Column chromatography was performed employing Kieselgel 60 from Merck (70–230 mesh) or Chromatorex DIOL or NH series from Fuji Silysia (MB100-40/75). Melting points were determined using a Fargo MP-2D melting point apparatus. For NMR spectroscopy, a deuterated solvent was used to stabilize the magnetic field (lock) and for shimming, with the residual protons of the solvent serving as the internal standard. High-resolution mass spectrometry (HRMS) was conducted using either a Bruker microTOF-QII (Q-TOF) or Sciex QSTAR XL (Q-TOF) instrument.

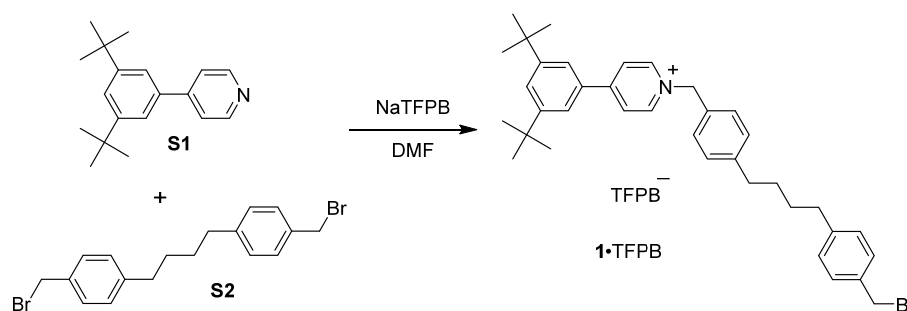

**Pyridinium salt 1·TFPB:** A solution of the pyridine derivative **S1**<sup>[1]</sup> (100 mg, 370  $\mu$ mol), the dibromide **S2**<sup>[2]</sup> (296 mg, 750  $\mu$ mol), and NaTFPB (331 mg, 370  $\mu$ mol) in DMF (3.7 mL) was stirred at room temperature for 16 h. The solution was partitioned between EtOAc (3  $\times$  20 mL) and H<sub>2</sub>O (20 mL). The combined organic phases were dried (MgSO<sub>4</sub>) and concentrated. The residue was purified chromatographically (SiO<sub>2</sub>; CH<sub>2</sub>Cl<sub>2</sub>/hexane, 5:1) to afford the salt **1**·TFPB as a pale-yellow oil (390 mg, 73%). <sup>1</sup>H NMR (400 MHz, CD<sub>2</sub>Cl<sub>2</sub>)  $\delta$  = 8.43 (d, *J* = 6.8 Hz, 2H), 8.14 (d, *J* = 6.8 Hz, 2H), 7.75 (t, *J* = 2.0 Hz, 1H), 7.68 (s, 8H), 7.53 (d, *J* = 2.0 Hz, 2H), 7.51 (s, 4H), 7.33–7.20 (m, 6H), 7.11 (d, *J* = 8.0 Hz, 2H), 5.53 (s, 2H), 4.46 (s, 2H), 2.66 (t, *J* = 6.8 Hz, 2H), 2.60 (t, *J* = 6.8 Hz, 2H), 1.66–1.60 (m, 4H), 1.34 (s, 18H); <sup>13</sup>C NMR (100 MHz, CDCl<sub>3</sub>)  $\delta$  = 161.7 (q, *J*<sub>CB</sub> = 50 Hz), 160.2, 153.5, 146.3, 142.9, 142.2, 135.2, 134.8, 132.2, 130.3, 130.2, 129.0, 129.0 (q, *J* = 31.3 Hz), 128.8, 128.3, 127.2, 125.6, 124.5 (q, *J*<sub>CF</sub> = 271 Hz), 122.1, 117.5, 64.5, 64.5, 35.3, 35.1, 33.8, 31.0, 30.7, 30.5; HR-MS (ESI): calcd for [**1**]<sup>+</sup> C<sub>37</sub>H<sub>45</sub>BrN<sup>+</sup>, *m/z* 582.2730; found 582.2707.

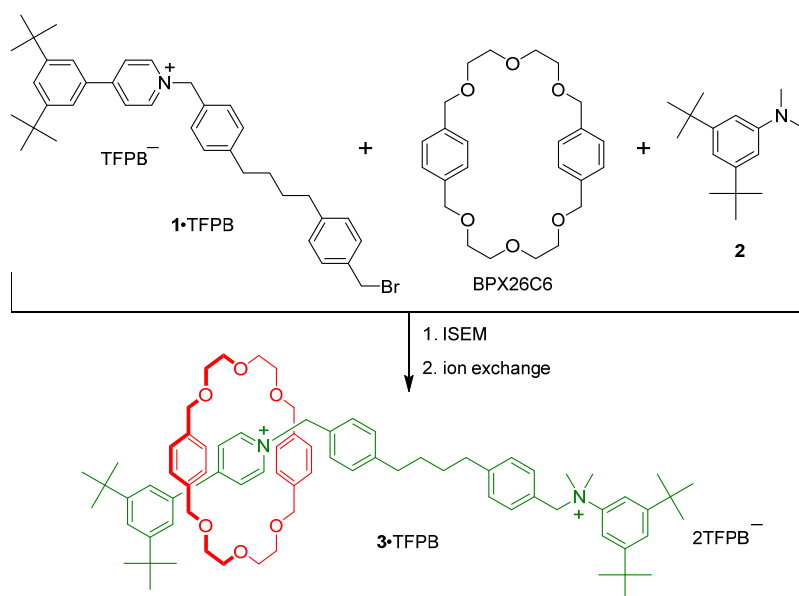

**Surrogate rotaxane 3·2TFPB (through the ISEM):** A solution of the pyridinium salt **1**·TFPB (1.45 g, 1.00 mmol) and BPX26C6<sup>[3]</sup> (418 mg, 1.00 mmol) in CH<sub>2</sub>Cl<sub>2</sub> (10 mL) was concentrated. A solution of the aniline derivative **2**<sup>[4]</sup> (350 mg, 1.50 mmol, dissolved in a few drops of CH<sub>2</sub>Cl<sub>2</sub>) was added to the residue and then the solution was concentrated. After sitting at room temperature for 16 h, EtOAc (100 mL) and NaTFPB (886 mg, 1.00 mmol) were added sequentially to the greasy residue. The mixture was partitioned between EtOAc (3 × 100 mL) and H<sub>2</sub>O (100 mL). The combined organic phases were dried (MgSO<sub>4</sub>) and concentrated. The residue was purified chromatographically (Diol-silica gel; CH<sub>2</sub>Cl<sub>2</sub>/hexane, 3:1) to afford the rotaxane **3**·2TFPB as a white solid (1.70 g, 61%). M.p. 74–75 °C; <sup>1</sup>H NMR (400 MHz, CD<sub>2</sub>Cl<sub>2</sub>) δ = 7.95 (d, *J* = 6.8 Hz, 2H), 7.71 (s, 17H), 7.65–7.60 (m, 3H), 7.54 (s, 10H), 7.36–7.26 (m, 4H), 7.07 (d, *J* = 8.0 Hz, 2H), 7.02 (d, *J* = 1.2 Hz, 2H), 6.69 (d, *J* = 8.0 Hz, 2H), 6.52 (s, 8H), 4.62 (s, 2H), 4.56 (s, 2H), 4.14 (d, *J* = 10.0 Hz, 4H), 4.03 (d, *J* = 10.0 Hz, 4H), 3.74–3.60 (m, 16H), 3.43 (s, 6H), 2.66 (t, *J* = 7.4 Hz, 2H), 2.56 (t, *J* = 7.4 Hz, 2H), 1.68–1.54 (m, 4H), 1.45 (s, 18H), 1.25 (s, 18H); <sup>13</sup>C NMR (100 MHz, CDCl<sub>3</sub>) δ = 161.7 (q, *J*<sub>CB</sub> = 50 Hz), 154.9, 154.2, 152.4, 147.1, 145.0, 143.4, 142.6, 136.6, 134.8, 132.8, 131.7, 130.1, 129.3–128.4 (m), 129.3, 128.3, 126.5, 125.7, 124.8, 124.5 (q, *J*<sub>CF</sub> = 271 Hz), 122.4, 121.9, 117.4, 113.8, 75.8, 73.4, 71.1, 70.2, 62.9, 52.6, 35.4, 35.3, 35.3, 35.1, 31.2, 31.1, 30.7, 30.6 (two signals were missing, possibly because of signal overlap); HR-MS (ESI): calcd for [**3**]<sup>2+</sup> C<sub>77</sub>H<sub>104</sub>N<sub>2</sub>O<sub>6</sub><sup>2+</sup>, *m/z* 576.3942; found 576.3966.

**Surrogate rotaxane 3·2TFPB (in solution):** The aniline **2** (12.1 mg, 51.9 μmol) was added to a solution of the pyridinium salt **1**·TFPB (50.0 mg, 34.5 μmol) and BPX26C6 (14.4 mg, 34.5 μmol) in CH<sub>2</sub>Cl<sub>2</sub> (0.35 mL) and then the mixture was stirred at room temperature for 16 h. After addition of EtOAc (20 mL) and NaTFPB (30.6 mg, 34.5 μmol), the mixture was partitioned between EtOAc (3 × 20 mL) and H<sub>2</sub>O (20 mL). The combined organic phases were dried (MgSO<sub>4</sub>) and concentrated. The residue was purified chromatographically (Diol-silica gel; CH<sub>2</sub>Cl<sub>2</sub>/hexane, 3:1) to afford the rotaxane **3**·2TFPB as a white solid (31.4 mg, 32%).

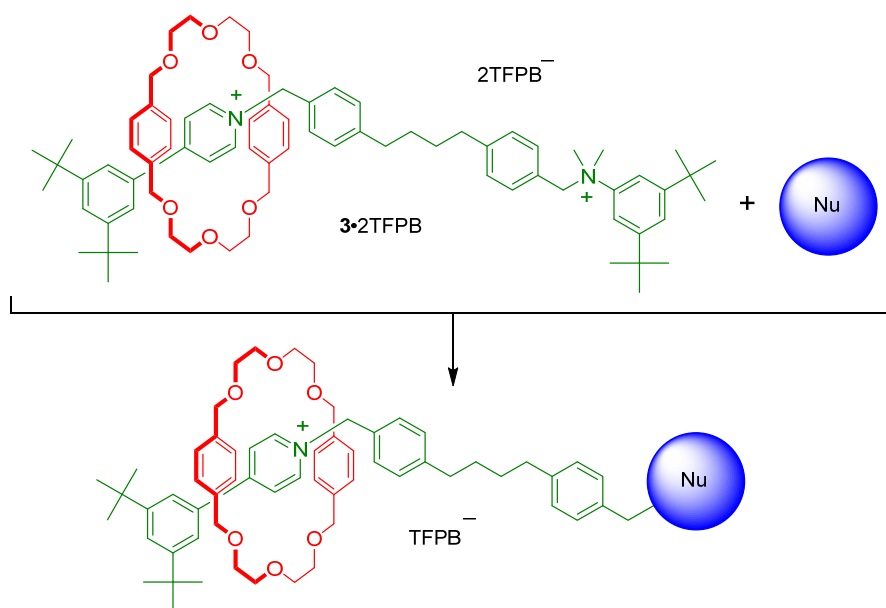

**Rotaxane 4·TFPB (from 3·2TFPB in solution):** A solution of 3,5-di-*tert*-butylbenzylamine<sup>[5]</sup> (6.86 mg, 31.3  $\mu\text{mol}$ ) and the rotaxane 3·2TFPB (30.0 mg, 10.4  $\mu\text{mol}$ ) in MeCN (100  $\mu\text{L}$ ) was stirred at 60  $^{\circ}\text{C}$  for 72 h. After evaporating the solvent under reduced pressure, the residue was purified chromatographically (NH-silica gel;  $\text{CH}_2\text{Cl}_2/\text{hexane}$ , 1:4) to afford the rotaxane 4·TFPB (15.7 mg, 75%) and the surrogate stopper 2 (1.82 mg, 75%) as a pale-yellow oil and a colorless sticky oil, respectively.  $^1\text{H}$  NMR (400 MHz,  $\text{CD}_3\text{CN}$ )  $\delta$  = 8.09 (d,  $J$  = 6.4 Hz, 2H), 7.77–7.65 (m, 15H), 7.57 (s, 2H), 7.45 (d,  $J$  = 8.0 Hz, 2H), 7.40 (d,  $J$  = 8.0 Hz, 2H), 7.36 (s, 1H), 7.18 (s, 2H), 7.15 (d,  $J$  = 7.6 Hz, 2H), 6.99 (d,  $J$  = 7.6 Hz, 2H), 6.52 (s, 8H), 4.93 (s, 2H), 4.16 (d,  $J$  = 10.0 Hz, 4H), 4.06 (d,  $J$  = 10.0 Hz, 4H), 3.80–3.62 (m, 20H), 2.74 (t,  $J$  = 6.8 Hz, 2H), 2.55 (t,  $J$  = 6.8 Hz, 2H), 1.66–1.59 (m, 4H), 1.50 (s, 18H), 1.32 (s, 18H);  $^{13}\text{C}$  NMR (100 MHz,  $\text{CD}_2\text{Cl}_2$ )  $\delta$  = 162.2 (q,  $J_{\text{CB}}$  = 50 Hz), 154.6, 152.8, 151.3, 151.0, 145.8, 144.0, 141.6, 141.4, 137.2, 135.3, 133.5, 130.7, 129.9, 129.3–128.4 (m), 129.2, 128.8, 128.7, 126.9, 125.4, 125.1 (q,  $J_{\text{CF}}$  = 271 Hz), 123.2, 122.9, 122.5, 121.4, 117.9, 73.8, 71.6, 70.8, 63.4, 57.9, 35.9, 35.8, 35.7, 35.5, 35.1, 31.6, 31.5, 31.4; HR-MS (ESI): calcd for  $[\mathbf{4}]^+$   $\text{C}_{76}\text{H}_{101}\text{N}_2\text{O}_6^+$ ,  $m/z$  1137.7654; found 1137.7687.

**Rotaxane 4·TFPB (from 3·2TFPB through the ISEM):** A solution of 3,5-di-*tert*-butylbenzylamine (6.90 mg, 31.5  $\mu\text{mol}$ ) and the rotaxane 3·2TFPB (30.0 mg, 10.4  $\mu\text{mol}$ ) in MeCN (1 mL) was concentrated. After sitting at 60  $^{\circ}\text{C}$  for 72 h, EtOAc (20 mL) was added to the greasy residue. The mixture was partitioned between EtOAc (3  $\times$  20 mL) and  $\text{H}_2\text{O}$  (20 mL). The combined organic phases were dried ( $\text{MgSO}_4$ ) and concentrated. The residue was purified chromatographically (NH-silica gel;  $\text{CH}_2\text{Cl}_2/\text{hexane}$ , 1:4) to afford the rotaxane 4·TFPB as a pale-yellow oil (12.7 mg, 61%).

**Rotaxane 4·TFPB (directly from 1·TFPB in solution):** 3,5-Di-*tert*-butylbenzylamine (6.90 mg, 31.5  $\mu\text{mol}$ ) was added to a solution of the pyridinium salt 1·TFPB (30.0 mg, 20.7  $\mu\text{mol}$ ) and BPX26C6 (8.60 mg, 20.7  $\mu\text{mol}$ ) in  $\text{CH}_2\text{Cl}_2$  (0.21

mL) and then the mixture was stirred at room temperature for 16 h. EtOAc (20 mL) was added and then the mixture was partitioned between EtOAc (3 × 20 mL) and H<sub>2</sub>O (20 mL). The combined organic phases were dried (MgSO<sub>4</sub>) and concentrated. The residue was purified chromatographically (NH-silica gel; CH<sub>2</sub>Cl<sub>2</sub>/hexane, 1:4) to afford the rotaxane **4**·TFPB as a pale-yellow oil (12.0 mg, 28%).

**Rotaxane 4·TFPB (directly from 1·TFPB through the ISEM):** A solution of the pyridinium salt **1**·TFPB (30.0 mg, 20.7 μmol) and BPX26C6 (8.60 mg, 20.7 μmol) in CH<sub>2</sub>Cl<sub>2</sub> (1 mL) was concentrated. A solution of 3,5-di-*tert*-butylbenzylamine (6.90 mg, 31.5 μmol, dissolved in a few drops of CH<sub>2</sub>Cl<sub>2</sub>) was added to the residue and then the mixture was concentrated. After sitting at room temperature for 16 h, EtOAc (20 mL) was added to the greasy residue. The mixture was partitioned between EtOAc (3 × 20 mL) and H<sub>2</sub>O (20 mL). The combined organic phases were dried (MgSO<sub>4</sub>) and concentrated. The residue was purified chromatographically (NH-silica gel; CH<sub>2</sub>Cl<sub>2</sub>/hexane, 1:4) to afford the rotaxane **4**·TFPB as a pale-yellow oil (15.1 mg, 38%).

**Rotaxane 5·TFPB (from 3·2TFPB in solution):** A solution of 3,5-bis(1,1-dimethylethyl)benzoic acid (17.1 mg, 73.0 μmol) and TBAOH (1M in MeOH, 73.0 μL) in MeOH (0.73 mL) was stirred for 3 min. After evaporating the solvent under reduced pressure, the rotaxane **3**·2TFPB (70.0 mg, 24.3 μmol) and MeCN (0.24 mL) were added to the residue and then the mixture was stirred at 60 °C for 8 h. After cooling to room temperature, the solvent was evaporated and the residue purified chromatographically (Diol-silica gel, CH<sub>2</sub>Cl<sub>2</sub>/hexane, 1:4) to afford the rotaxane **5**·TFPB (38.2 mg, 78%) and the surrogate stopper **2** (5.30 mg, 91%) as a pale-yellow oil and a colorless sticky oil, respectively. <sup>1</sup>H NMR (400 MHz, CD<sub>2</sub>Cl<sub>2</sub>) δ = 7.93 (d, *J* = 6.8 Hz, 2H), 7.87 (d, *J* = 1.6 Hz, 2H), 7.70 (s, 9H), 7.63 (s, 1H), 7.60 (d, *J* = 6.8 Hz, 2H), 7.56–7.49 (m, 6H), 7.34–7.24 (m, 6H), 7.04 (d, *J* = 7.6 Hz, 2H), 6.52 (s, 8H), 5.26 (s, 2H), 4.61 (s, 2H), 4.14 (d, *J* = 9.6 Hz, 4H), 4.02 (d, *J* = 9.6 Hz, 4H), 3.70–3.60 (m, 16H), 2.69 (t, *J* = 7.2 Hz, 2H), 2.56 (t, *J* = 7.2 Hz, 2H), 1.68–1.55 (m, 4H), 1.45 (s, 18H), 1.31 (s, 18H); <sup>13</sup>C NMR (100 MHz, CDCl<sub>3</sub>) δ = 167.1, 161.6 (q, *J*<sub>CB</sub> = 50 Hz), 154.2, 152.4, 151.0, 145.2, 143.4, 142.0, 136.5, 134.7, 133.8, 132.8, 130.0, 129.4, 129.3, 129.3–128.4 (m), 129.0, 128.3, 128.2, 128.0, 127.2, 126.4, 124.7, 124.4 (q, *J*<sub>CF</sub> = 272.5 Hz), 123.7, 121.8, 117.3, 73.4, 71.1, 70.2, 66.2, 62.9, 35.4, 35.3, 35.1, 34.8, 31.3, 31.2, 31.0, 30.7; HR-MS (ESI): calcd for [**5**]<sup>2+</sup> C<sub>76</sub>H<sub>98</sub>NO<sub>8</sub><sup>+</sup>, *m/z* 1152.7287; found 1152.7247.

**Rotaxane 5·TFPB (directly from 1·TFPB through the ISEM):** A solution of the pyridinium salt **1**·TFPB (30.0 mg, 20.7 μmol) and BPX26C6 (8.60 mg, 20.7 μmol) in CH<sub>2</sub>Cl<sub>2</sub> (1 mL) was concentrated. A solution of TBA·3,5-di-*tert*-butylbenzoate (12.6 mg, 34.5 μmol, dissolved in a few drops of CH<sub>2</sub>Cl<sub>2</sub>) was added to the residue and then the solvent was evaporated. After sitting at room temperature for 16 h, EtOAc (20 mL) was added to the greasy residue. The mixture was partitioned between EtOAc (3 × 20 mL) and H<sub>2</sub>O (20 mL). The combined organic phases were dried (MgSO<sub>4</sub>) and concentrated. The residue was purified chromatographically (Diol-silica gel, CH<sub>2</sub>Cl<sub>2</sub>/hexane, 1:4) to afford the rotaxane **5**·TFPB as a pale-yellow oil (9.10 mg, 22%).

**Rotaxane 5·TFPB (directly from 1·TFPB in solution):** A solution of the pyridinium salt 1·TFPB (30.0 mg, 20.7  $\mu\text{mol}$ ) and BPX26C6 (8.60 mg, 20.7  $\mu\text{mol}$ ) in  $\text{CH}_2\text{Cl}_2$  (0.21 mL) was concentrated. TBA·3,5-di-*tert*-butylbenzoate (12.6 mg, 34.5  $\mu\text{mol}$ ) was added and then the mixture was stirred at room temperature for 16 h. EtOAc (20 mL) was added. The mixture was partitioned between EtOAc ( $3 \times 20$  mL) and  $\text{H}_2\text{O}$  (20 mL). The combined organic phases were dried ( $\text{MgSO}_4$ ) and concentrated. The residue was purified chromatographically (Diol-silica gel,  $\text{CH}_2\text{Cl}_2$ /hexane, 1:4) to afford the rotaxane 5·TFPB as a pale-yellow oil (5.30 mg, 13%).

**Rotaxane 6·TFPB:** A solution of 3,5-bis(1,1-dimethylethyl)benzenemethanethiol<sup>[6]</sup> (38.3 mg, 162  $\mu\text{mol}$ ), the rotaxane 3·2TFPB (150 mg, 52.0  $\mu\text{mol}$ ), and TBAOH (1 M in MeOH, 162  $\mu\text{L}$ ) in degassed MeCN (0.52 mL) was stirred at 60 °C for 3 h. After evaporating the solvent under reduced pressure, the residue was purified chromatographically (Diol-silica gel,  $\text{CH}_2\text{Cl}_2$ /hexane, 1:4) to afford the rotaxane 6·TFPB (72.2 mg, 70%) and the surrogate stopper 2 (9.80 mg, 80%) as a pale-yellow oil and a colorless sticky oil, respectively.  $^1\text{H}$  NMR (400 MHz,  $\text{CDCl}_3$ )  $\delta$  = 7.94 (d,  $J$  = 6.4 Hz, 2H), 7.71 (s, 9H), 7.61 (d,  $J$  = 6.4 Hz, 2H), 7.57–7.49 (m, 6H), 7.35–7.26 (m, 5H), 7.13–6.95 (m, 6H), 6.52 (s, 8H), 4.61 (s, 2H), 4.14 (d,  $J$  = 9.6 Hz, 4H), 4.03 (d,  $J$  = 9.6 Hz, 4H), 3.70–3.60 (m, 16H), 3.56 (s, 2H), 3.54 (s, 2H), 2.70 (t,  $J$  = 7.2 Hz, 2H), 2.55 (t,  $J$  = 7.2 Hz, 2H), 1.67–1.55 (m, 4H), 1.45 (s, 18H), 1.28 (s, 18H);  $^{13}\text{C}$  NMR (100 MHz,  $\text{CDCl}_3$ )  $\delta$  = 161.6 (q,  $J_{\text{CB}}$  = 50 Hz), 154.2, 152.4, 150.7, 145.3, 143.4, 140.8, 136.9, 136.5, 135.6, 134.7, 132.8, 130.1, 129.3, 129.0, 128.9–128.4 (m), 128.8, 128.2, 127.5, 127.4, 126.4, 124.8, 124.5 (q,  $J_{\text{CF}}$  = 271 Hz), 123.1, 120.9, 117.4, 73.4, 71.1, 70.2, 62.9, 36.3, 35.4, 35.4, 35.2, 35.1, 34.7, 31.3, 31.3, 31.0, 30.8; HR-MS (ESI): calcd for  $[\mathbf{6}]^+$   $\text{C}_{76}\text{H}_{100}\text{NO}_6\text{S}^+$ ,  $m/z$  1154.7266; found 1154.7244.

**Rotaxane 7·TFPB:** A solution of 3,5-di-*tert*-butylphenol (2.1 mg, 10  $\mu\text{mol}$ ) and TBAOH (1 M in MeOH, 10  $\mu\text{L}$ ) in MeOH (0.01 mL) was stirred for 3 min. After evaporating the solvent under reduced pressure, MeCN (0.07 mL) and the rotaxane 3·2TFPB (20 mg, 6.9  $\mu\text{mol}$ ) were added to the residue and then the mixture was stirred at 60 °C for 6 h. The solvent was evaporated under reduced pressure and the residue purified chromatographically (Diol-silica gel,  $\text{CH}_2\text{Cl}_2$ /hexane, 1:4) to afford the rotaxane 7·TFPB (8.90 mg, 64%) and the surrogate stopper 2 (1.30 mg, 80%) as a pale-yellow oil and a colorless sticky oil, respectively.  $^1\text{H}$  NMR (400 MHz,  $\text{CD}_2\text{Cl}_2$ ):  $\delta$  = 7.93 (d,  $J$  = 6.4 Hz, 2H), 7.70 (s, 9H), 7.60 (d,  $J$  = 6.4 Hz, 2H), 7.55–7.48 (m, 6H), 7.34–7.22 (m, 6H), 7.06 (s, 1H), 7.02 (d,  $J$  = 7.2 Hz, 2H), 6.76 (s, 2H), 6.52 (s, 8H), 4.93 (s, 2H), 4.61 (s, 2H), 4.14 (d,  $J$  = 9.6 Hz, 4H), 4.03 (d,  $J$  = 9.6 Hz, 4H), 3.70–3.60 (m, 16H), 2.70 (t,  $J$  = 6.8 Hz, 2H), 2.57 (t,  $J$  = 6.8 Hz, 2H), 1.70–1.58 (m, 4H), 1.44 (s, 18H), 1.26 (s, 18H);  $^{13}\text{C}$  NMR (100 MHz,  $\text{CDCl}_3$ )  $\delta$  = 161.7 (q,  $J_{\text{CB}}$  = 50 Hz), 158.5, 154.2, 152.5, 152.2, 145.3, 143.5, 142.0, 136.6, 134.8, 134.7, 132.9, 130.1, 129.4, 129.1, 129.1–128.4 (m), 129.0, 128.5, 128.4, 127.9, 126.5, 124.9, 124.6 (q,  $J_{\text{CF}}$  = 271 Hz), 121.9, 117.4, 115.2, 109.0, 73.5, 71.2, 70.3, 69.9, 63.0, 35.5, 35.4, 35.2, 35.0, 31.4, 31.1, 30.8; HR-MS (ESI): calcd for  $[\mathbf{7}]^+$   $\text{C}_{75}\text{H}_{98}\text{NO}_7^+$ ,  $m/z$  1124.7338; found 1124.7363.

**Rotaxane 8·TFPB:** A mixture of dibenzyl malonate<sup>[7]</sup> (44.4 mg, 160  $\mu\text{mol}$ ) and  $\text{K}_2\text{CO}_3$  (28.1 mg, 200  $\mu\text{mol}$ ) in DMSO (0.52 mL) was stirred at room temperature for 3 min. After adding the rotaxane 3·2TFPB (150 mg, 52.0  $\mu\text{mol}$ ), the mixture was stirred at 60 °C for 24 h. The mixture was partitioned between EtOAc (3  $\times$  100 mL) and  $\text{H}_2\text{O}$  (100 mL). The combined organic phases were dried ( $\text{MgSO}_4$ ) and concentrated. The residue was purified chromatographically (Diol-silica gel;  $\text{CH}_2\text{Cl}_2/\text{hexane}, 1:4$ ) to afford the [2]rotaxane 8·TFPB (47.5 mg, 44%) and its derived [3]rotaxane S1·TFPB (15.2 mg, 16%) as light-yellow oils and the surrogate stopper 2 (10.91 mg, 90%) as a sticky oil.  $^1\text{H}$  NMR (400 MHz,  $\text{CD}_2\text{Cl}_2$ )  $\delta$  = 7.93 (d,  $J$  = 6.0 Hz, 2H), 7.69 (s, 9H), 7.59 (d,  $J$  = 6.0 Hz, 2H), 7.56–7.46 (m, 6H), 7.34–7.21 (m, 10H), 7.21–7.12 (m, 4H), 6.96 (d,  $J$  = 7.8 Hz, 2H), 6.91 (d,  $J$  = 7.8 Hz, 2H), 6.51 (s, 8H), 5.08–4.97 (m, 4H), 4.59 (s, 2H), 4.14 (d,  $J$  = 9.6 Hz, 4H), 4.02 (d,  $J$  = 9.6 Hz, 4H), 3.71–3.60 (m, 17H), 3.12 (d,  $J$  = 8.0 Hz, 2H), 2.68 (t,  $J$  = 6.8 Hz, 2H), 2.51 (t,  $J$  = 6.8 Hz, 2H), 1.63–1.51 (m, 4H), 1.44 (s, 18H);  $^{13}\text{C}$  NMR (100 MHz,  $\text{CDCl}_3$ )  $\delta$  = 168.5, 161.6 (q,  $J_{\text{CB}}$  = 50 Hz), 154.2, 152.4, 145.3, 143.4, 140.5, 136.5, 135.1, 134.8, 134.7, 132.8, 130.0, 129.3, 129.3–128.4(m), 128.6, 128.4, 128.3, 128.2, 128.0, 126.4, 124.8, 124.5 (q,  $J_{\text{CF}}$  = 271 Hz), 121.8, 117.3, 73.4, 71.1, 70.2, 67.1, 62.9, 53.8, 35.4, 35.2, 35.1, 34.2, 31.3, 31.0, 30.7 (two signals were missing, possibly because of signal overlap); HR-MS (ESI): calcd for [8]<sup>+</sup>  $\text{C}_{78}\text{H}_{92}\text{NO}_{10}^+$ ,  $m/z$  1202.6716; found 1202.6711.

Data for [3]rotaxane S1·TFPB:  $^1\text{H}$  NMR (400 MHz,  $\text{CD}_2\text{Cl}_2$ )  $\delta$  8.02 (d,  $J$  = 6.8 Hz, 4H), 7.82–7.77 (m, 18H), 7.69 (d,  $J$  = 6.8 Hz, 4H), 7.62 (s, 8H), 7.60 (d,  $J$  = 1.6 Hz, 4H), 7.42–7.37 (m, 14H), 7.22–7.16 (m, 4H), 7.06–7.00 (m, 8H), 6.60 (s, 16H), 5.01 (s, 4H), 4.69 (s, 4H), 4.22 (d,  $J$  = 9.6 Hz, 8H), 4.11 (d,  $J$  = 9.6 Hz, 8H), 3.84–3.66 (m, 36H), 3.20 (s, 4H), 2.77 (t,  $J$  = 7.2 Hz, 4H), 2.61 (t,  $J$  = 7.2 Hz, 4H), 1.76–1.66 (m, 8H), 1.53 (s, 36H);  $^{13}\text{C}$  NMR (100 MHz,  $\text{CD}_2\text{Cl}_2$ )  $\delta$  170.4, 161.6 (q,  $J_{\text{CB}}$  = 50 Hz), 154.1, 152.2, 145.2, 143.4, 141.1, 136.7, 135.1, 134.7, 133.3, 132.9, 130.1, 130.0, 129.3–128.4 (m), 129.3, 128.3, 128.2, 128.2, 128.0, 126.4, 124.9, 124.5 (q,  $J_{\text{CF}}$  = 271 Hz), 122.0, 117.4, 73.3, 71.1, 70.2, 66.9, 62.9, 60.5, 38.6, 35.4, 35.2, 35.0, 31.2, 31.1, 30.9 (two signals were missing, possibly because of signal overlap); HR-MS (ESI): calcd for [M]<sup>2+</sup>  $\text{C}_{139}\text{H}_{168}\text{N}_2\text{O}_{16}^{2+}$ ,  $m/z$  1060.6191; found 1060.6189.

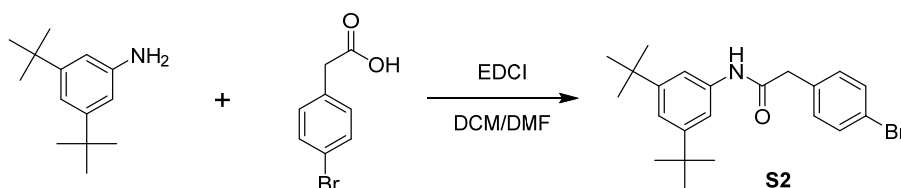

**Amide S2:** EDCI (933 mg, 4.87 mmol) was added to a solution of 4-bromophenylacetic acid (1.05 g, 4.87 mmol) in  $\text{CH}_2\text{Cl}_2$  (40 mL) and DMF (40 mL) at 0 °C. After stirring at 0 °C for 15 min, 3,5-di-*tert*-butylaniline (500 mg, 2.47 mmol) was added and then the mixture was stirred at room temperature for 6 h. The mixture was partitioned between EtOAc (100 mL) and 1 M HCl (100 mL). The organic phase was washed with  $\text{NaHCO}_3$  (2  $\times$  100 mL), dried ( $\text{MgSO}_4$ ), and concentrated. The residue was purified chromatographically ( $\text{SiO}_2$ ; EtOAc/hexane, 1:9) to afford the amide S2 as a white solid (868 mg, 87%). M.p. = 229–230 °C;  $^1\text{H}$  NMR (400 MHz,  $\text{CDCl}_3$ )  $\delta$  = 7.50 (d,  $J$  = 8.4 Hz, 2H), 7.27 (s, 2H), 7.21 (d,  $J$  = 8.4 Hz, 2H), 7.16 (s,

1H), 7.01 (br, 1H), 3.66 (s, 2H), 1.28 (s, 18H); <sup>13</sup>C NMR (100 MHz, CDCl<sub>3</sub>) δ = 168.1, 151.6, 136.8, 133.4, 132.0, 131.1, 121.4, 118.7, 114.4, 44.0, 34.8, 31.3; HR-MS (ESI): calcd for [S<sub>2</sub> + H]<sup>+</sup> C<sub>22</sub>H<sub>29</sub>BrNO<sup>+</sup>, *m/z* 402.1427; found 402.1429.

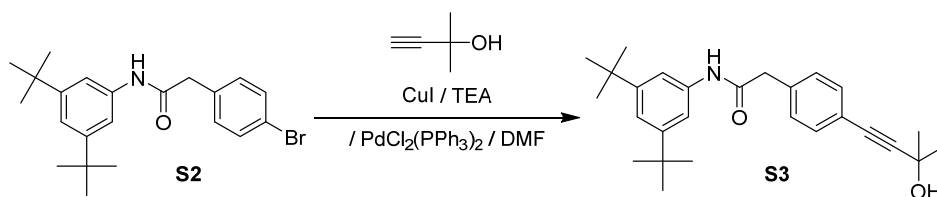

**Alcohol S3:** Degassed TEA (1.26 g, 124 mmol) was added to a mixture of the amide S<sub>2</sub> (5.00 g, 12.4 mmol), CuI (118 mg, 620 μmol), and PdCl<sub>2</sub>(PPh<sub>3</sub>)<sub>2</sub> (436 mg, 620 μmol) in degassed DMF (62 mL). After stirring at room temperature for 5 min, 2-methyl-3-butyn-2-ol (3.10 g, 37.2 mmol) was added and then the mixture was heated at 70 °C for 16 h. After cooling to room temperature, the mixture was partitioned between EtOAc (100 mL) and H<sub>2</sub>O (3 × 100 mL). The organic phase was dried (MgSO<sub>4</sub>) and concentrated. The residue was purified chromatographically (SiO<sub>2</sub>; EtOAc/hexane, 1:3) to afford the amide S<sub>3</sub> as a white solid (4.50 g, 89%). M.p. = 209–210 °C; <sup>1</sup>H NMR (400 MHz, CDCl<sub>3</sub>) δ = 7.47 (d, *J* = 8.0 Hz, 2H), 7.34 (d, *J* = 8.0 Hz, 2H), 7.32 (s, 2H), 7.21 (s, 1H), 7.14 (br, 1H), 3.72 (s, 2H), 2.11 (s, 1H), 1.63 (s, 6H), 1.33 (s, 18H); <sup>13</sup>C NMR (100MHz, CDCl<sub>3</sub>) δ = 168.8, 151.5, 137.1, 134.8, 132.1, 129.3, 121.8, 118.6, 114.5, 94.2, 81.6, 65.5, 44.4, 34.8, 31.4, 31.3; HR-MS (ESI): calcd for [S<sub>3</sub> + H]<sup>+</sup> C<sub>27</sub>H<sub>36</sub>NO<sub>2</sub><sup>+</sup>, *m/z* 406.2741; found 406.2743.

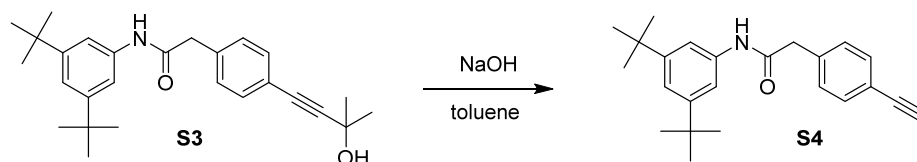

**Alkyne S4:** A mixture of the amide S<sub>3</sub> (294 mg, 0.725 mmol) and NaOH (58.0 mg, 1.45 mmol) in toluene (24 mL) was heated at 110 °C for 2 h. After cooling to room temperature, the mixture was partitioned between EtOAc (50 mL) and H<sub>2</sub>O (3 × 50mL). The organic phase was dried (MgSO<sub>4</sub>) and concentrated. The solid residue was washed with hexane to afford the alkyne S<sub>4</sub> as pale-yellow solid (141 mg, 56%). M.p. = 208.5 °C; <sup>1</sup>H NMR (400 MHz, CDCl<sub>3</sub>) δ = 7.50 (d, *J* = 8.0 Hz, 2H), 7.29 (d, *J* = 8.0 Hz, 2H), 7.26 (s, 2H), 7.15 (s, 1H), 6.98 (br, 1H), 3.70 (s, 2H), 3.08 (s, 1H), 1.27 (s, 18H); <sup>13</sup>C NMR (100 MHz, CDCl<sub>3</sub>) δ = 168.3, 151.6, 136.9, 135.3, 132.6, 129.4, 121.2, 118.7, 114.4, 83.1, 77.6, 44.5, 34.8, 31.3; HR-MS (ESI): calcd for [S<sub>4</sub> + H]<sup>+</sup> C<sub>24</sub>H<sub>30</sub>NO<sup>+</sup>, *m/z* 348.2322; found 348.2328.



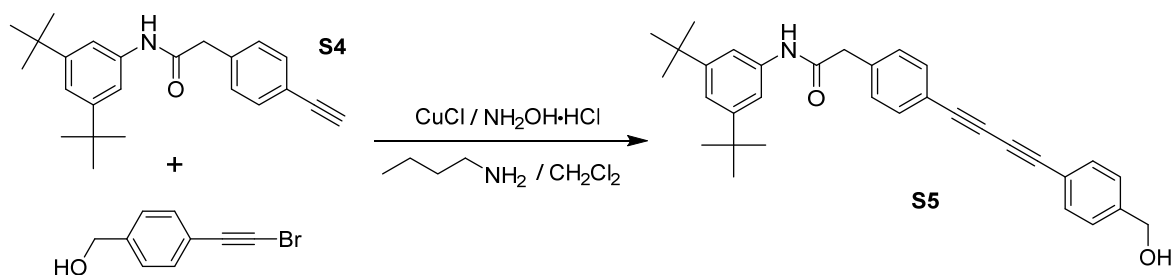

**Alcohol S5:** CuCl (12.5 mg, 127  $\mu\text{mol}$ ) and  $\text{NH}_2\text{OH}\cdot\text{HCl}$  (26.4 mg, 38.0  $\mu\text{mol}$ ) were mixed in *n*- $\text{BuNH}_2$  (1.9 mL) and deionized water (4.5 mL). After adding a solution of the alkyne **S4** (441 mg 1.27 mmol) in  $\text{CH}_2\text{Cl}_2$  (5.6 mL), the mixture was stirred at 0  $^\circ\text{C}$  for 5 min. A solution of 4-(2-bromoethynyl)benzenemethanol<sup>[8]</sup> (295 mg, 1.39 mmol) in  $\text{CH}_2\text{Cl}_2$  (2.8 mL) was added to the mixture via syringe pump over a period of 1 h. The mixture was stirred at room temperature for 2 h before adding saturated  $\text{NH}_4\text{Cl}_{(\text{aq})}$  (50 mL) and partitioning between  $\text{CH}_2\text{Cl}_2$  (50 mL) and  $\text{H}_2\text{O}$  ( $3 \times 50$  mL). The organic phase was dried ( $\text{MgSO}_4$ ) and concentrated. The residue was purified chromatographically ( $\text{SiO}_2$ ; EtOAc/hexane, 1:3) to afford the alcohol **S5** as a white solid (405 mg, 67%). M.p. = 210–211  $^\circ\text{C}$ ;  $^1\text{H}$  NMR (400 MHz,  $\text{CD}_3\text{SOCD}_3$ )  $\delta$  = 10.09 (s, 1H), 7.61–7.55 (m, 4H), 7.49 (s, 2H), 7.44–7.35 (m, 4H), 7.10 (s, 1H), 5.33 (t,  $J$  = 5.6 Hz, 1H), 4.55 (d,  $J$  = 5.6 Hz, 2H), 3.69 (s, 2H), 1.26 (s, 18H);  $^{13}\text{C}$  NMR (100 MHz,  $\text{CD}_3\text{SOCD}_3$ )  $\delta$  = 168.6, 151.0, 145.2, 139.0, 138.6, 132.7, 132.6, 130.1, 127.0, 119.0, 118.9, 117.4, 113.8, 82.4, 82.0, 73.9, 73.5, 62.8, 43.6, 34.9, 31.6; HR-MS (ESI): calcd for  $[\text{S5} + \text{H}]^+ \text{C}_{33}\text{H}_{36}\text{NO}_2^+$ ,  $m/z$  478.2741; found 478.2729.

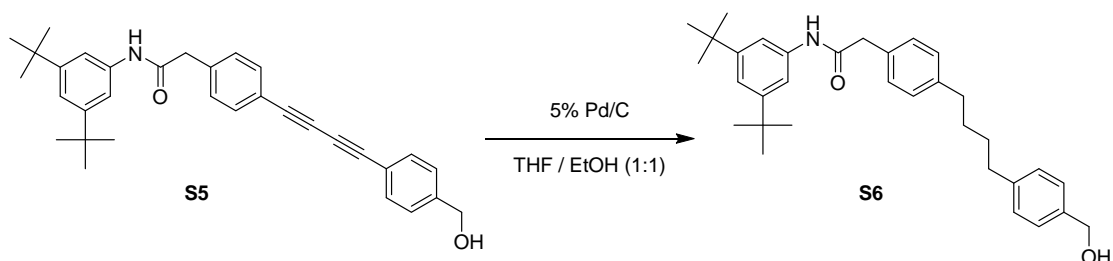

**Alcohol S6:** Pd/C (5%, 90 mg) was added to a solution of the alcohol **S4** (405 mg, 848  $\mu\text{mol}$ ) in THF/EtOH (1:1, 42 mL). The mixture was purged with  $\text{H}_2$  for 15 min and then stirred under a  $\text{H}_2$  atmosphere at room temperature for 45 min. The mixture was filtered through Celite and the filtrate concentrated under reduced pressure. The residue was purified chromatographically ( $\text{SiO}_2$ ; EtOAc/hexane, 1:7) to afford the alcohol **S6** as a white solid (386 mg, 94%). M.p. = 162–163  $^\circ\text{C}$ ;  $^1\text{H}$  NMR (400 MHz,  $\text{CDCl}_3$ )  $\delta$  = 7.25–7.18 (m, 6H), 7.17–7.10 (m, 5H), 7.06 (s, 1H), 4.57 (s, 2H), 3.60 (s, 2H), 2.64–2.56 (m, 4H), 1.64–1.59 (m, 4H), 1.24 (s, 18H);  $^{13}\text{C}$  NMR (100 MHz,  $\text{CDCl}_3$ )  $\delta$  = 169.8, 151.5, 141.7, 141.5, 138.4, 137.4, 132.1, 129.4, 129.0, 128.5, 127.1, 118.5, 114.7, 64.9, 44.2, 35.4, 35.4, 31.4, 31.1, 30.9, 30.4; HR-MS (ESI): calcd for  $[\text{S6} + \text{Na}]^+ \text{C}_{33}\text{H}_{43}\text{NNaO}_2^+$ ,  $m/z$  508.3186; found 508.3167.

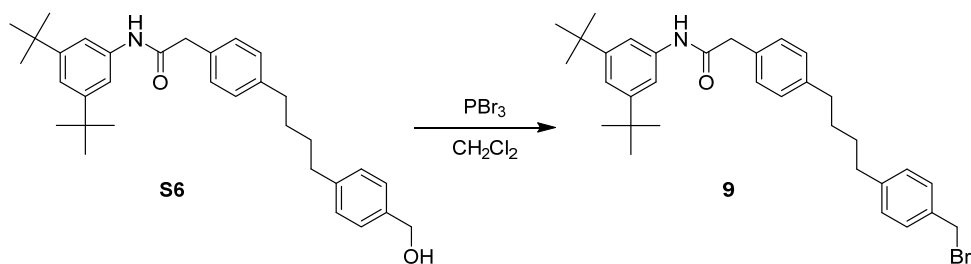

**Amide 9:** PBr<sub>3</sub> (520 mg, 1.92 mmol) was added to a solution of the alcohol **S6** (888 mg, 1.83 mmol) in CH<sub>2</sub>Cl<sub>2</sub> (18.3 mL) at 0 °C and then the mixture was stirred at room temperature for 16 h. After partitioning between CH<sub>2</sub>Cl<sub>2</sub> (2 × 100 mL) and H<sub>2</sub>O (100 mL), the combined organic phases were dried (MgSO<sub>4</sub>) and concentrated. The residue was purified chromatographically (SiO<sub>2</sub>; EtOAc/hexane, 1:19) to afford the amide **9** as a white solid (926 mg, 92%). M.p. = 163–164 °C; <sup>1</sup>H NMR (400 MHz, CD<sub>2</sub>Cl<sub>2</sub>) δ = 7.28–7.17 (m, 6H), 7.17–7.08 (m, 5H), 7.06 (s, 1H), 4.46 (s, 2H), 3.60 (s, 2H), 2.68–2.53 (m, 4H), 1.68–1.58 (m, 4H), 1.24 (s, 18H); <sup>13</sup>C NMR (100 MHz, CDCl<sub>3</sub>) δ = 169.6, 151.5, 142.9, 141.5, 137.4, 135.1, 132.1, 129.4, 129.0, 129.0, 128.8, 118.5, 114.6, 44.31, 35.5, 35.4, 34.9, 33.8, 31.4, 31.0, 30.8; HR-MS (ESI): calcd for [**9** + H]<sup>+</sup> C<sub>33</sub>H<sub>43</sub>BrNO<sup>+</sup>, *m/z* 548.2523; found 548.2516.

**Surrogate rotaxane 10·TFPB (through the ISEM, 2 equiv. of BPX26C6 and NaTFPB):** A solution of the amide **9** (17.8 mg, 32.4 μmol), BPX26C6 (27.0 mg, 64.8 μmol), and NaTFPB (57.4 mg, 64.8 μmol) in CH<sub>2</sub>Cl<sub>2</sub> (1 mL) was concentrated. The aniline derivative **2** (11.4 mg, 48.8 μmol, dissolved in a few drops of CH<sub>2</sub>Cl<sub>2</sub>) was added to the residue and then the solvent was evaporated. After sitting at room temperature for 16 h, EtOAc (20 mL) was added to the greasy residue. The mixture was partitioned between EtOAc (3 × 20 mL) and H<sub>2</sub>O (20 mL). The combined organic phases were dried (MgSO<sub>4</sub>) and concentrated. The residue was purified chromatographically (Diol-silica gel; CH<sub>2</sub>Cl<sub>2</sub>/hexane, 1:2) to afford the rotaxane **10**·TFPB as a white solid. (27.7 mg, 43%). M.p. = 102–103 °C; <sup>1</sup>H NMR (400 MHz, CD<sub>2</sub>Cl<sub>2</sub>) δ = 7.70 (s, 9H), 7.53 (s, 4H), 7.34 (d, *J* = 1.6 Hz, 2H), 7.27–7.12 (m, 10H), 7.01 (d, *J* = 8.0 Hz, 2H), 6.70–6.55 (br, 8H), 4.20–4.10 (m, 8H), 3.95–3.80 (m, 4H), 3.67–3.44 (m, 14H), 3.03 (s, 2H), 2.79–2.62 (m, 4H), 2.01 (s, 6H), 1.76–1.65 (m, 4H), 1.55 (s, 18H), 1.26 (s, 18H); <sup>13</sup>C NMR (100 MHz, CDCl<sub>3</sub>) δ = 169.2, 161.6 (q, *J*<sub>CB</sub> = 50 Hz), 152.3, 151.6, 146.8, 144.8, 141.5, 137.1, 136.8, 134.7, 133.5, 131.9, 130.1, 129.4, 129.3–128.4 (m), 129.0, 128.5, 125.5, 124.4 (q, *J*<sub>CF</sub> = 271 Hz), 123.8, 118.6, 117.4, 117.0, 114.4, 73.8, 72.0, 70.5, 68.0, 50.1, 44.3, 35.8, 35.5, 35.2, 34.8, 31.6, 31.2, 31.0, 30.6; HR-MS (ESI): calcd for [**10**]<sup>+</sup> C<sub>73</sub>H<sub>101</sub>N<sub>2</sub>O<sub>7</sub><sup>+</sup>, *m/z* 1117.7603; found 1117.7604.

**Surrogate rotaxane 10·TFPB (through the ISEM, 1 equiv. of BPX26C6 and NaTFPB):** A solution of the amide **9** (243 mg, 442 μmol), BPX26C6 (184 mg, 442 μmol), and NaTFPB (392 mg, 442 μmol) in CH<sub>2</sub>Cl<sub>2</sub> (5 mL) was concentrated. The aniline derivative **2** (155 mg, 663 μmol, dissolved in a few drops of CH<sub>2</sub>Cl<sub>2</sub>) was added to the residue and then the solvent was evaporated. After sitting at room temperature for 16 h, EtOAc (50 mL) was added to the greasy residue. The mixture was partitioned between EtOAc (3 × 50 mL) and H<sub>2</sub>O (50 mL). The combined organic phases were dried (MgSO<sub>4</sub>) and concentrated. The residue was purified

chromatographically (Diol-silica gel; CH<sub>2</sub>Cl<sub>2</sub>/hexane, 1:2) to afford the rotaxane **10**·TFPB as a white solid (216 mg, 25%).

**Surrogate rotaxane 10·TFPB (in solution):** The bulky aniline **2** (12.6 mg, 54.0 μmol) was added to a solution of the amide **9** (20.0 mg, 36.4 μmol), BPX26C6 (15.2 mg, 36.4 μmol), and NaTFPB (32.3 mg, 36.4 μmol) in CH<sub>2</sub>Cl<sub>2</sub> (0.36 mL). After stirring at room temperature for 16 h, EtOAc (20 mL) was added. The mixture was partitioned between EtOAc (3 × 20 mL) and H<sub>2</sub>O (20 mL). The combined organic phases were dried (MgSO<sub>4</sub>) and concentrated. The residue was purified chromatographically (Diol-silica gel; CH<sub>2</sub>Cl<sub>2</sub>/hexane, 1:2) to afford the rotaxane **10**·TFPB as a white solid (10.0 mg, 14%).

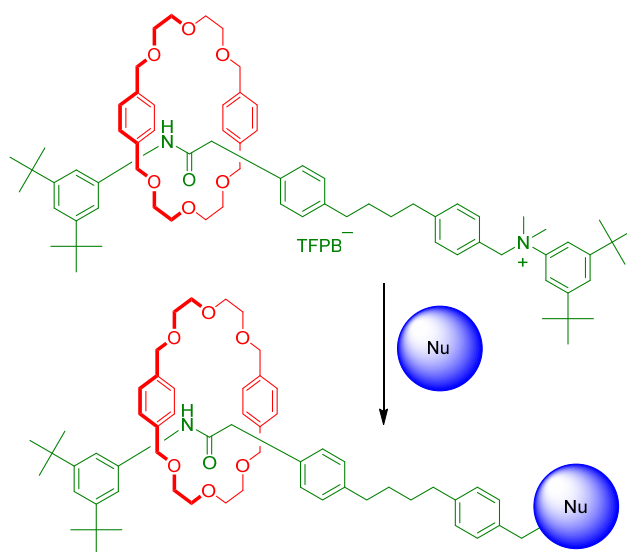

**Rotaxane 11 (from 10·TFPB in solution):** A solution of 3,5-di-*tert*-butylbenzylamine (33.2 mg, 150 μmol) and the rotaxane **10**·TFPB (100 mg, 50.0 μmol) in MeCN (0.5 mL) was stirred at 60 °C for 72 h. After evaporating the solvent under reduced pressure, the residue was purified chromatographically (NH-silica gel; EA/hexane, 1:7) to afford the rotaxane **11** (54.6 mg, 98%) and the surrogate stopper **2** (10.2 mg, 90%) as a light-yellow oil and a colorless sticky oil, respectively. <sup>1</sup>H NMR (400 MHz, CD<sub>2</sub>Cl<sub>2</sub>) δ = 7.94 (s, 1H), 7.46 (d, *J* = 2.0 Hz, 2H), 7.28 (t, *J* = 2.0 Hz, 1H), 7.21 (d, *J* = 8.0 Hz, 2H), 7.13 (d, *J* = 2.0 Hz, 2H), 7.10–7.07 (m, 3H), 6.90 (s, 8H), 6.85 (d, *J* = 8.0 Hz, 2H), 6.48 (d, *J* = 8.0 Hz, 2H), 4.26–4.18 (m, 8H), 3.70 (s, 4H), 3.53–3.41 (m, 16H), 2.80 (s, 2H), 2.52 (t, *J* = 7.2 Hz, 2H), 2.44 (t, *J* = 7.2 Hz, 2H), 1.55–1.40 (m, 4H), 1.36 (s, 18H), 1.29 (s, 18H); <sup>13</sup>C NMR (100 MHz, CD<sub>2</sub>Cl<sub>2</sub>) δ = 167.3, 150.6, 150.6, 141.5, 140.0, 139.6, 137.8, 137.2, 132.8, 129.9, 128.3, 128.1, 127.5, 127.4, 122.3, 120.8, 115.9, 113.5, 73.0, 72.5, 70.4, 69.5, 69.0, 42.1, 35.3, 35.2, 34.8, 34.6, 31.3, 31.2, 31.2, 29.6 (one signal was missing, possibly because of signal overlap); HR-MS (ESI): calcd for [**11** + H]<sup>+</sup> C<sub>72</sub>H<sub>99</sub>N<sub>2</sub>O<sub>7</sub><sup>+</sup>, *m/z* 1103.7447; found 1103.7468.

**Rotaxane 11 (directly from 9 through the ISEM):** A solution of the amide **9** (15.0 mg, 27.3 μmol), BPX26C6 (11.4 mg, 27.3 μmol), and NaTFPB (24.2 mg, 27.3 μmol)

in CH<sub>2</sub>Cl<sub>2</sub> (1 mL) was concentrated. 3,5-Di-*tert*-butylbenzylamine (8.99 mg, 41.0 μmol, dissolved in a few drops of CH<sub>2</sub>Cl<sub>2</sub>) was added to the residue and then the organic solvent was evaporated. After sitting at room temperature for 16 h, EtOAc (20 mL) was added to the greasy residue. The mixture was partitioned between EtOAc (3 × 20 mL) and H<sub>2</sub>O (20 mL). The combined organic phases were dried (MgSO<sub>4</sub>) and concentrated. The residue was purified chromatographically (NH-silica gel; EA/hexane, 1:7) to afford the rotaxane **11** as a light-yellow oil (4.40 mg, 15%).

**Rotaxane 11 (directly from 9 in solution):** 3,5-Di-*tert*-butylbenzylamine (8.99 mg, 41.0 μmol) was added to a solution of the amide **9** (15.0 mg, 27.3 μmol), BPX26C6 (11.4 mg, 27.3 μmol), and NaTFPB (24.2 mg, 27.3 μmol) in CH<sub>2</sub>Cl<sub>2</sub> (0.27 mL) and then the mixture was stirred at room temperature for 16 h. EtOAc (20 mL) was added. The mixture was partitioned between EtOAc (3 × 20 mL) and H<sub>2</sub>O (20 mL). The combined organic phases were dried (MgSO<sub>4</sub>) and concentrated. The residue was purified chromatographically (NH-silica gel; EA/hexane, 1:7) to afford the rotaxane **11** as a light-yellow oil (1.60 mg, 5%).

**Rotaxane 12:** A solution of 3,5-bis(1,1-dimethylethyl)benzoic acid (28.4 mg, 121 μmol) and TBAOH (1 M in MeOH, 121 μL) in MeOH (1.21 mL) was stirred for 3 min. After evaporating the solvent under reduced pressure, the rotaxane **10**·TFPB (80.0 mg, 40.0 μmol) and MeCN (0.4 mL) were added and then the mixture was stirred at 60 °C for 8 h. After cooling to room temperature, the solvent was evaporated and the residue purified chromatographically (SiO<sub>2</sub>, EA/hexane, 1:7) to afford the rotaxane **12** (42.9 mg, 97%) and the surrogate stopper **2** (8.80 mg, 94%) as a pale-yellow oil and a colorless sticky oil, respectively. <sup>1</sup>H NMR (400 MHz, CDCl<sub>3</sub>) δ = 7.97–7.87 (m, 3H), 7.62 (t, *J* = 2.0 Hz, 1H), 7.47 (d, *J* = 1.6 Hz, 2H), 7.36 (d, *J* = 8.0 Hz, 2H), 7.17 (d, *J* = 8.0 Hz, 2H), 7.09 (s, 1H), 6.93 (s, 8H), 6.89 (d, *J* = 7.6 Hz, 2H), 6.53 (d, *J* = 7.6 Hz, 2H), 5.34 (s, 2H), 4.33–4.19 (m, 8H), 3.62–3.41 (m, 16H), 2.87 (s, 2H), 2.53 (t, *J* = 7.2 Hz, 2H), 2.44 (t, *J* = 7.2 Hz, 2H), 1.54–1.44 (m, 4H), 1.39 (s, 18H), 1.33 (s, 18H); <sup>13</sup>C NMR (100 MHz, CDCl<sub>3</sub>) δ = 167.2, 167.2, 151.0, 150.6, 142.9, 140.0, 139.7, 137.0, 133.5, 132.8, 130.0, 129.6, 128.6, 128.4, 128.0, 127.6, 127.1, 123.9, 115.8, 113.4, 73.2, 70.5, 68.9, 66.4, 42.1, 35.5, 35.3, 35.0, 34.9, 31.7, 31.3, 31.3, 31.0; HR-MS (ESI): calcd for [**12** + H]<sup>+</sup> C<sub>72</sub>H<sub>96</sub>NO<sub>9</sub><sup>+</sup>, *m/z* 1118.7080; found 1118.7029.

**Rotaxane 13:** A solution of 3,5-bis(1,1-dimethylethyl)benzenemethanethiol (7.16 mg, 30.0 μmol), the rotaxane **10**·TFPB (20.0 mg, 10.0 μmol), and TBAOH (1 M in MeOH, 30 μL) in degassed MeCN (0.1 mL) was stirred at 60 °C for 3 h. After evaporating the organic solvent under reduced pressure, the residue was purified chromatographically (SiO<sub>2</sub>, EA/hexane, 1:8) to afford the rotaxane **13** (10.4 mg, 93%) and the surrogate stopper **2** (1.94 mg, 83%) as a pale-yellow oil and a colorless sticky oil, respectively. <sup>1</sup>H NMR (400 MHz, CDCl<sub>3</sub>) δ = 7.96 (s, 1H), 7.48 (s, 2H), 7.30 (s, 1H), 7.22–7.09 (m, 7H), 6.94 (s, 8H), 6.89 (d, *J* = 7.6 Hz, 2H), 6.52 (d, *J* = 7.6 Hz, 2H), 4.33–4.23 (m, 8H), 3.64–3.42 (m, 20H), 2.85 (s, 2H), 2.54 (t, *J* = 6.8 Hz, 2H), 2.46 (t, *J* = 6.8 Hz, 2H), 1.60–1.45 (m, 4H), 1.40 (s, 18H), 1.33 (s, 18H); <sup>13</sup>C NMR (100 MHz, CDCl<sub>3</sub>) δ = 167.0, 150.7, 150.6, 141.4, 140.0, 139.7, 137.1, 137.0, 135.4, 132.8, 130.0, 128.8, 128.5, 128.3, 127.5, 123.2, 120.8, 115.6, 113.3, 73.2, 70.5, 68.9, 42.0, 36.2, 35.4, 35.4,

35.3, 34.9, 34.7, 31.7, 31.4, 31.3, 31.0; HR-MS (ESI): calcd for [**13** + H]<sup>+</sup> C<sub>72</sub>H<sub>98</sub>NO<sub>7</sub>S<sup>+</sup>, *m/z* 1120.7059; found 1120.7103.

**Rotaxane 14:** A solution of 3,5-di-*tert*-butylphenol (12.5 mg, 60.0 μmol) and TBAOH (1 M in MeOH, 60.0 μL) in MeOH (0.6 mL) was stirred for 3 min. After evaporating the solvent under reduced pressure, MeCN (0.4 mL) and the rotaxane **10**·TFPB (80.0 mg, 40.0 μmol) were added to the residue and then the mixture was stirred at 60 °C for 6 h. The solvent was evaporated under reduced pressure and the residue was purified chromatographically (SiO<sub>2</sub>, EA/hexane, 1:6) to afford the rotaxane **14** (40.5 mg, 93%) and the surrogate stopper **2** (7.20 mg, 78%) as a pale-yellow oil and a colorless sticky oil, respectively. <sup>1</sup>H NMR (400 MHz, CDCl<sub>3</sub>) δ = 7.92 (s, 1H), 7.47 (d, *J* = 1.6 Hz, 2H), 7.34 (d, *J* = 8.0 Hz, 2H), 7.18 (d, *J* = 8.0 Hz, 2H), 7.10 (s, 1H), 7.02 (s, 1H), 6.93 (s, 8H), 6.91 (d, *J* = 8.0 Hz, 2H), 6.83 (d, *J* = 1.6 Hz, 2H), 6.56 (d, *J* = 8.0 Hz, 2H), 4.96 (s, 2H), 4.32–4.22 (m, 8H), 3.60–3.44 (m, 16H), 2.89 (s, 2H), 2.56 (t, *J* = 7.2 Hz, 2H), 2.46 (t, *J* = 7.2 Hz, 2H), 1.58–1.48 (m, 4H), 1.39 (s, 18H), 1.31 (s, 18H); <sup>13</sup>C NMR (100 MHz, CDCl<sub>3</sub>) δ = 167.1, 158.5, 152.0, 150.6, 142.5, 140.0, 139.6, 137.0, 134.5, 132.7, 130.0, 128.5, 128.3, 127.9, 127.6, 115.8, 114.9, 113.4, 109.1, 73.2, 70.5, 69.8, 68.9, 42.1, 35.4, 35.3, 34.9, 31.6, 31.4, 31.2, 31.0 (one signal was missing, possibly because of signal overlap); HR-MS (ESI): calcd for [**14** + H]<sup>+</sup> C<sub>71</sub>H<sub>96</sub>NO<sub>8</sub><sup>+</sup>, *m/z* 1090.7130; found 1090.7078.

**Rotaxane 15:** A mixture of dibenzyl malonate (17.2 mg, 0.06 mmol) and K<sub>2</sub>CO<sub>3</sub> (10.8 mg, 7.81 μmol) in DMSO (0.4 mL) was stirred at room temperature for 3 min. After adding the rotaxane **10**·TFPB (80 mg, 0.04 mmol), the mixture was stirred at 60 °C for 24 h. The mixture was partitioned between EtOAc (3 × 100 mL) and H<sub>2</sub>O (100 mL). The combined organic phases were dried (MgSO<sub>4</sub>) and concentrated. The residue was purified chromatographically (Diol-silica gel; CH<sub>2</sub>Cl<sub>2</sub>/hexane, 1:4) to afford the [2]rotaxane **15** (22.6 mg, 48%) and surrogate stopper **2** (8.90 mg, 95%) as a pale-yellow oil and a colorless sticky oil, respectively. <sup>1</sup>H NMR (400 MHz, CD<sub>2</sub>Cl<sub>2</sub>) δ = 7.95 (s, 1H), 7.46 (d, *J* = 2.0 Hz, 2H), 7.34–7.24 (m, 6H), 7.22–7.16 (m, 4H), 7.09 (t, *J* = 2.0 Hz, 1H), 7.03 (s, 4H), 6.90 (s, 8H), 6.84 (d, *J* = 8.8 Hz, 2H), 6.47 (d, *J* = 8.8 Hz, 2H), 5.13–5.00 (m, 4H), 4.30–4.15 (m, 8H), 3.72 (t, *J* = 7.6 Hz, 1H), 3.57–3.39 (m, 16H), 3.16 (d, *J* = 7.6 Hz, 2H), 2.78 (s, 2H), 2.48 (t, *J* = 7.2 Hz, 2H), 2.42 (t, *J* = 7.2 Hz, 2H), 1.49–1.44 (m, 4H), 1.37 (s, 18H); <sup>13</sup>C NMR (100 MHz, CD<sub>2</sub>Cl<sub>2</sub>) δ = 168.4, 167.1, 150.5, 141.4, 139.9, 139.8, 137.2, 135.4, 134.7, 132.8, 129.9, 128.5, 128.3, 128.2, 128.1, 128.0, 127.3, 115.7, 113.4, 73.0, 70.4, 68.9, 66.9, 42.0, 35.2, 34.8, 34.2, 31.5, 31.3, 31.3, 31.0, 30.4; (one signal was missing, possibly because of signal overlap) HR-MS (ESI): calcd for [**15** + H]<sup>+</sup> C<sub>74</sub>H<sub>90</sub>NO<sub>11</sub><sup>+</sup>, *m/z* 1168.6508; found 1168.6485.

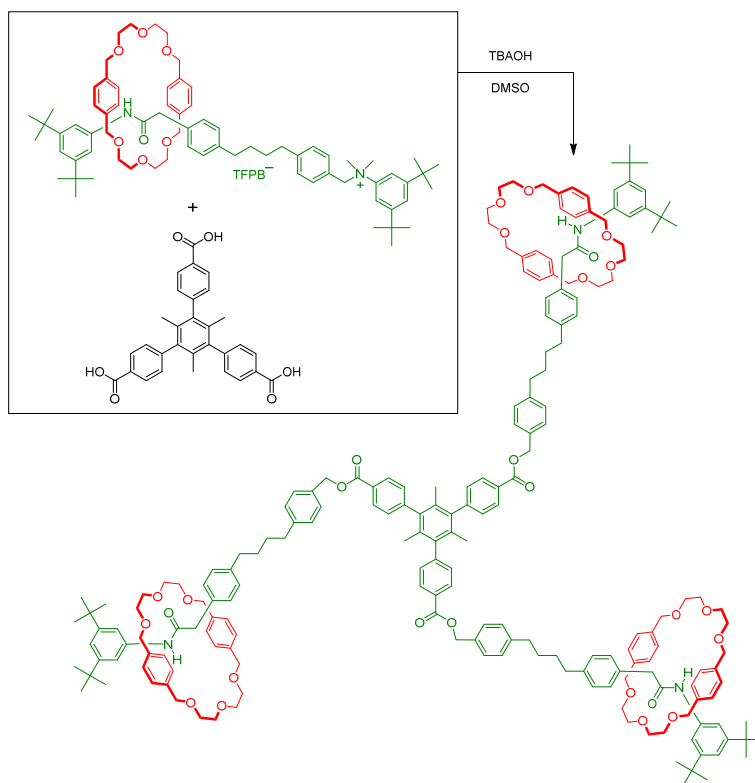

**Rotaxane 17:** A solution of 4,4',4''-(2,4,6-trimethylbenzene-1,3,5-triyl)tribenzoic acid (**16**)<sup>[9]</sup> (3.4 mg, 7.1  $\mu\text{mol}$ ) and TBAOH (1 M in MeOH, 21.4  $\mu\text{L}$ ) in MeOH (0.1 mL) was concentrated to afford a solid, which was washed with EtOAc (3  $\times$  10 mL), dried under vacuum, and dissolved in DMSO (2.5 mL). The rotaxane **10**·TFPB (50 mg, 25  $\mu\text{mol}$ ) was added and the mixture stirred at 60  $^{\circ}\text{C}$  for 36 h. The mixture was partitioned between  $\text{CH}_2\text{Cl}_2$  (3  $\times$  20 mL) and  $\text{H}_2\text{O}$  (20 mL). The combined organic phases were dried ( $\text{MgSO}_4$ ) and concentrated. The residue was purified chromatographically ( $\text{SiO}_2$ , EA/hexane, 1:1) to afford the rotaxane **17** as a colorless oil (15.8 mg, 71%).  $^1\text{H}$  NMR (400 MHz,  $\text{CD}_2\text{Cl}_2$ )  $\delta$  = 8.15 (d,  $J$  = 8.0 Hz, 6H), 7.96 (s, 3H), 7.51 (s, 6H), 7.38 (d,  $J$  = 8.0 Hz, 6H), 7.32 (d,  $J$  = 8.0 Hz, 6H), 7.23 (d,  $J$  = 8.0 Hz, 6H), 7.16 (s, 3H), 7.04–6.87 (m, 30H), 6.59 (d,  $J$  = 7.6 Hz, 6H), 5.31 (s, 6H), 4.34–4.24 (m, 24H), 3.62–3.47 (m, 48H), 2.91 (s, 6H), 2.59 (t,  $J$  = 6.8 Hz, 6H), 2.50 (t,  $J$  = 6.8 Hz, 6H), 1.69 (s, 9H), 1.58–1.50 (m, 12H), 1.43 (s, 54H).  $^{13}\text{C}$  NMR (100 MHz,  $\text{CD}_2\text{Cl}_2$ )  $\delta$  = 167.2, 166.0, 150.6, 146.7, 142.9, 140.0, 139.6, 139.0, 137.1, 133.3, 132.7, 132.4, 129.8, 129.4, 128.7, 128.4, 128.2, 128.1, 127.5, 115.9, 113.5, 72.9, 70.4, 68.9, 66.5, 42.1, 35.3, 35.2, 34.8, 31.3, 31.2, 31.0, 18.9. (one signal was missing, possibly because of signal overlap) HR-MS (ESI): calcd for [**17** + 2H]<sup>2+</sup>  $\text{C}_{201}\text{H}_{245}\text{N}_3\text{O}_{27}^{2+}$ ,  $m/z$  1566.3940; found 1566.3865.

## Reference

1. C.-F. Lin, C.-C. Lai, Y.-H. Liu, S.-M. Peng and S.-H. Chiu, *Chem. Eur. J.* 2007, **13**, 4350–4355.
2. J. Wang, X. Gao, A. Boarino, F. Célerse, C. Corminboeuf and H.-A. Klok, *Macromolecules* 2022, **55**, 10145–10152.

3. P.-N. Cheng, P.-Y.; Huang, W.-S. Li, S.-H. Ueng, W.-C. Hung, Y.-H. Liu, C.-C. Lai, Y. Wang, S.-M. Peng, I. Chao and S.-H. Chiu, *J. Org. Chem.* 2006, **71**, 2373–2383.
4. J. Z. Chan, Y. Chang and M. Wasa, *Org. Lett.* 2019, **21**, 984–988.
5. J. Y. C. Lim, N. Yuntawattana, P. D. Beer and C. K. Williams, *Angew. Chem. Int. Ed.* 2019, **58**, 6007–6011.
6. S. Grunder, D. M. Torres, C. Marquardt, A. Błaszczuk, R. Krupke and M. Mayor, *Eur. J. Org. Chem.* 2011, 478–496.
7. T.-Y. Zhang, Y. Deng, K. Wei and Y.-R. Yang, *Org. Lett.* 2021, **23**, 1086–1089.
8. A. Adam and G. Haberhauer, *Chem. Eur. J.* 2017, **23**, 12190–12197.
9. A. M. Bumstead, D. B. Cordes, D. M. Dawson, K. K. Chakarova, M. Y. Mihaylov, C. L. Hobday, T. Düren, K. I. Hadjiivanov, A. M. Z. Slawin, S. E. Ashbrook, R. R. R. Prasad and P. A. Wright, *Chem. Eur. J.* 2018, **24**, 6115–6126.

Figure S1  $^1\text{H}$  NMR Spectrum (400 MHz /  $\text{CD}_2\text{Cl}_2$  / 298 K) of  $1 \cdot \text{TFPB}$

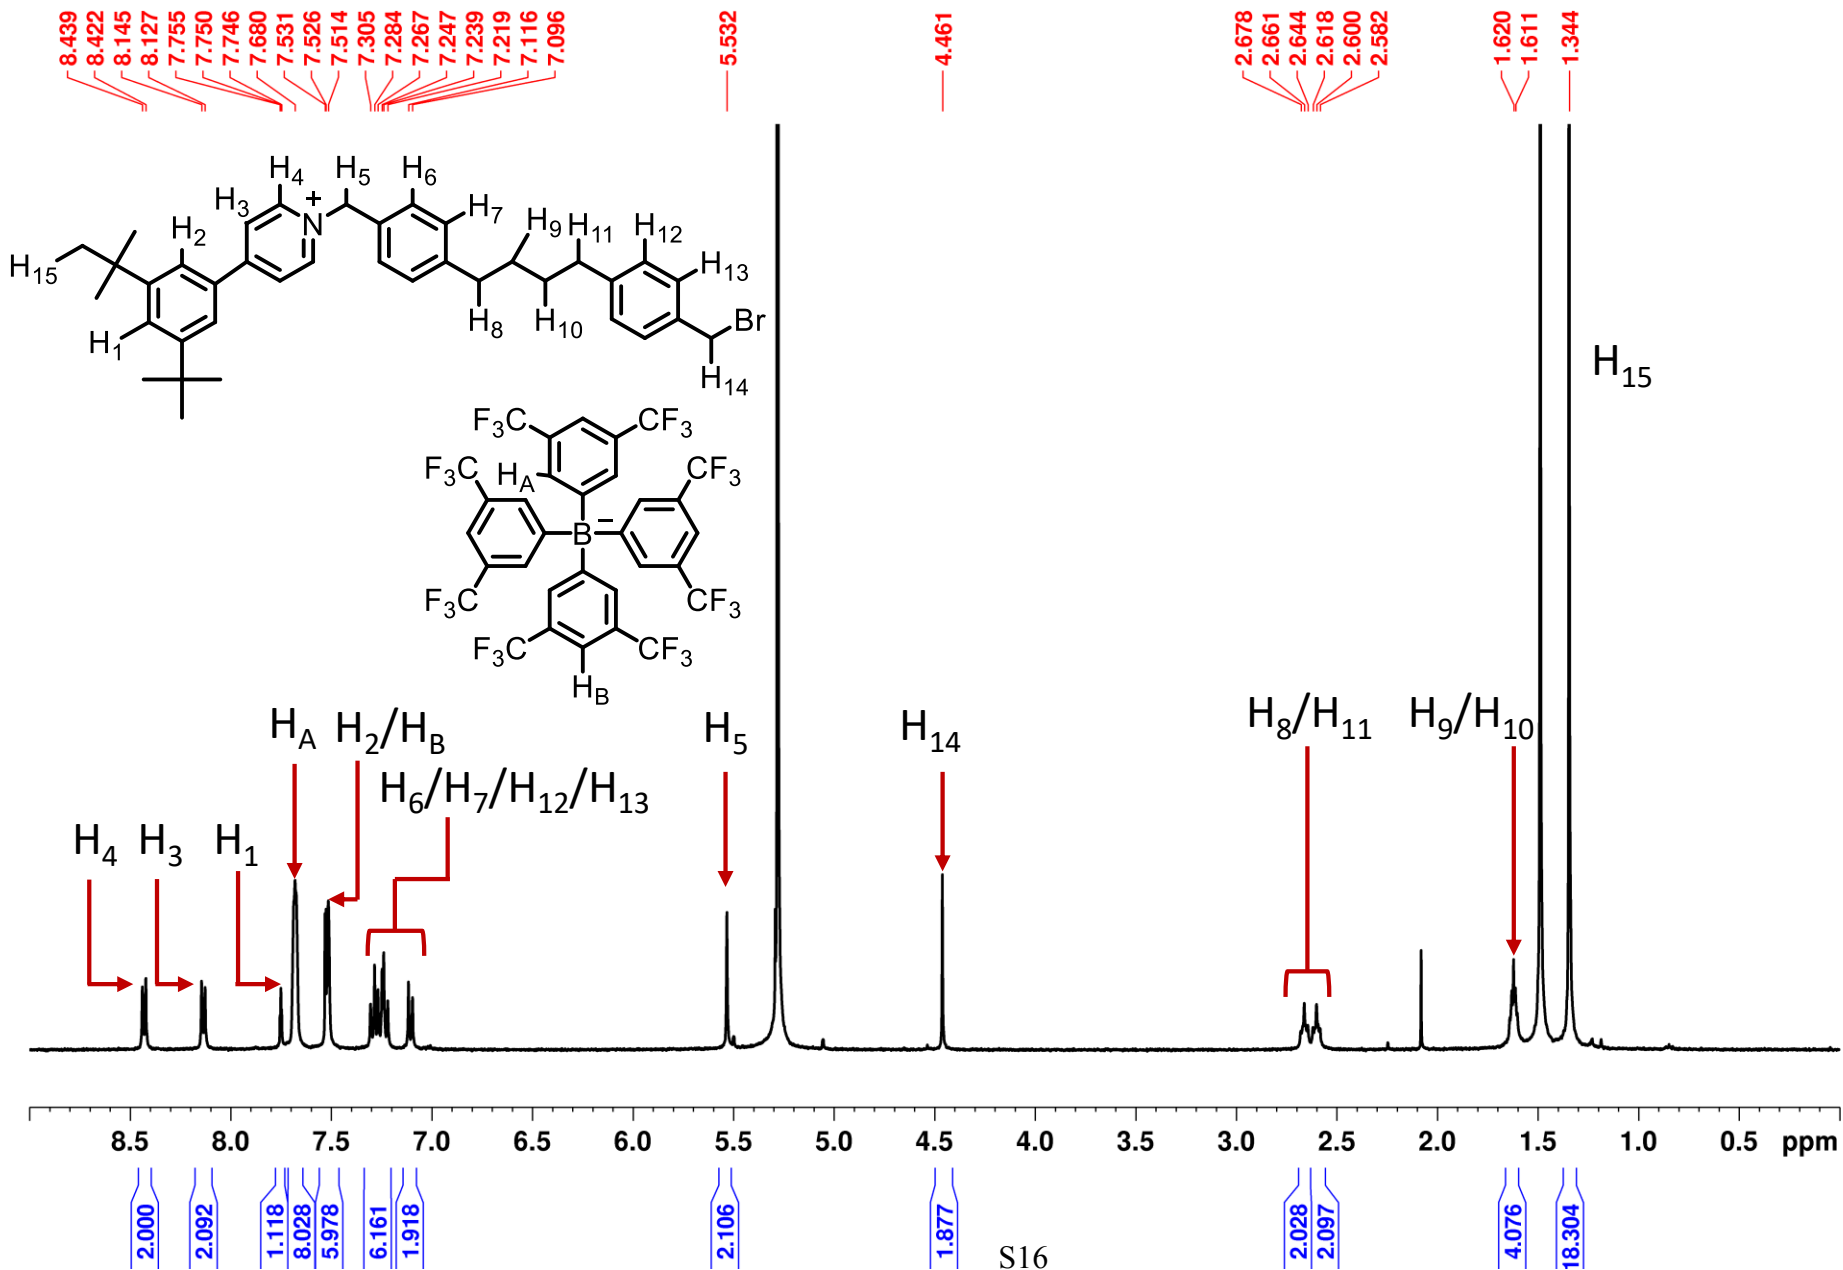



Figure S2  $^{13}\text{C}$  NMR Spectrum (100 MHz /  $\text{CDCl}_3$  / 298 K) of **1**·TFPB

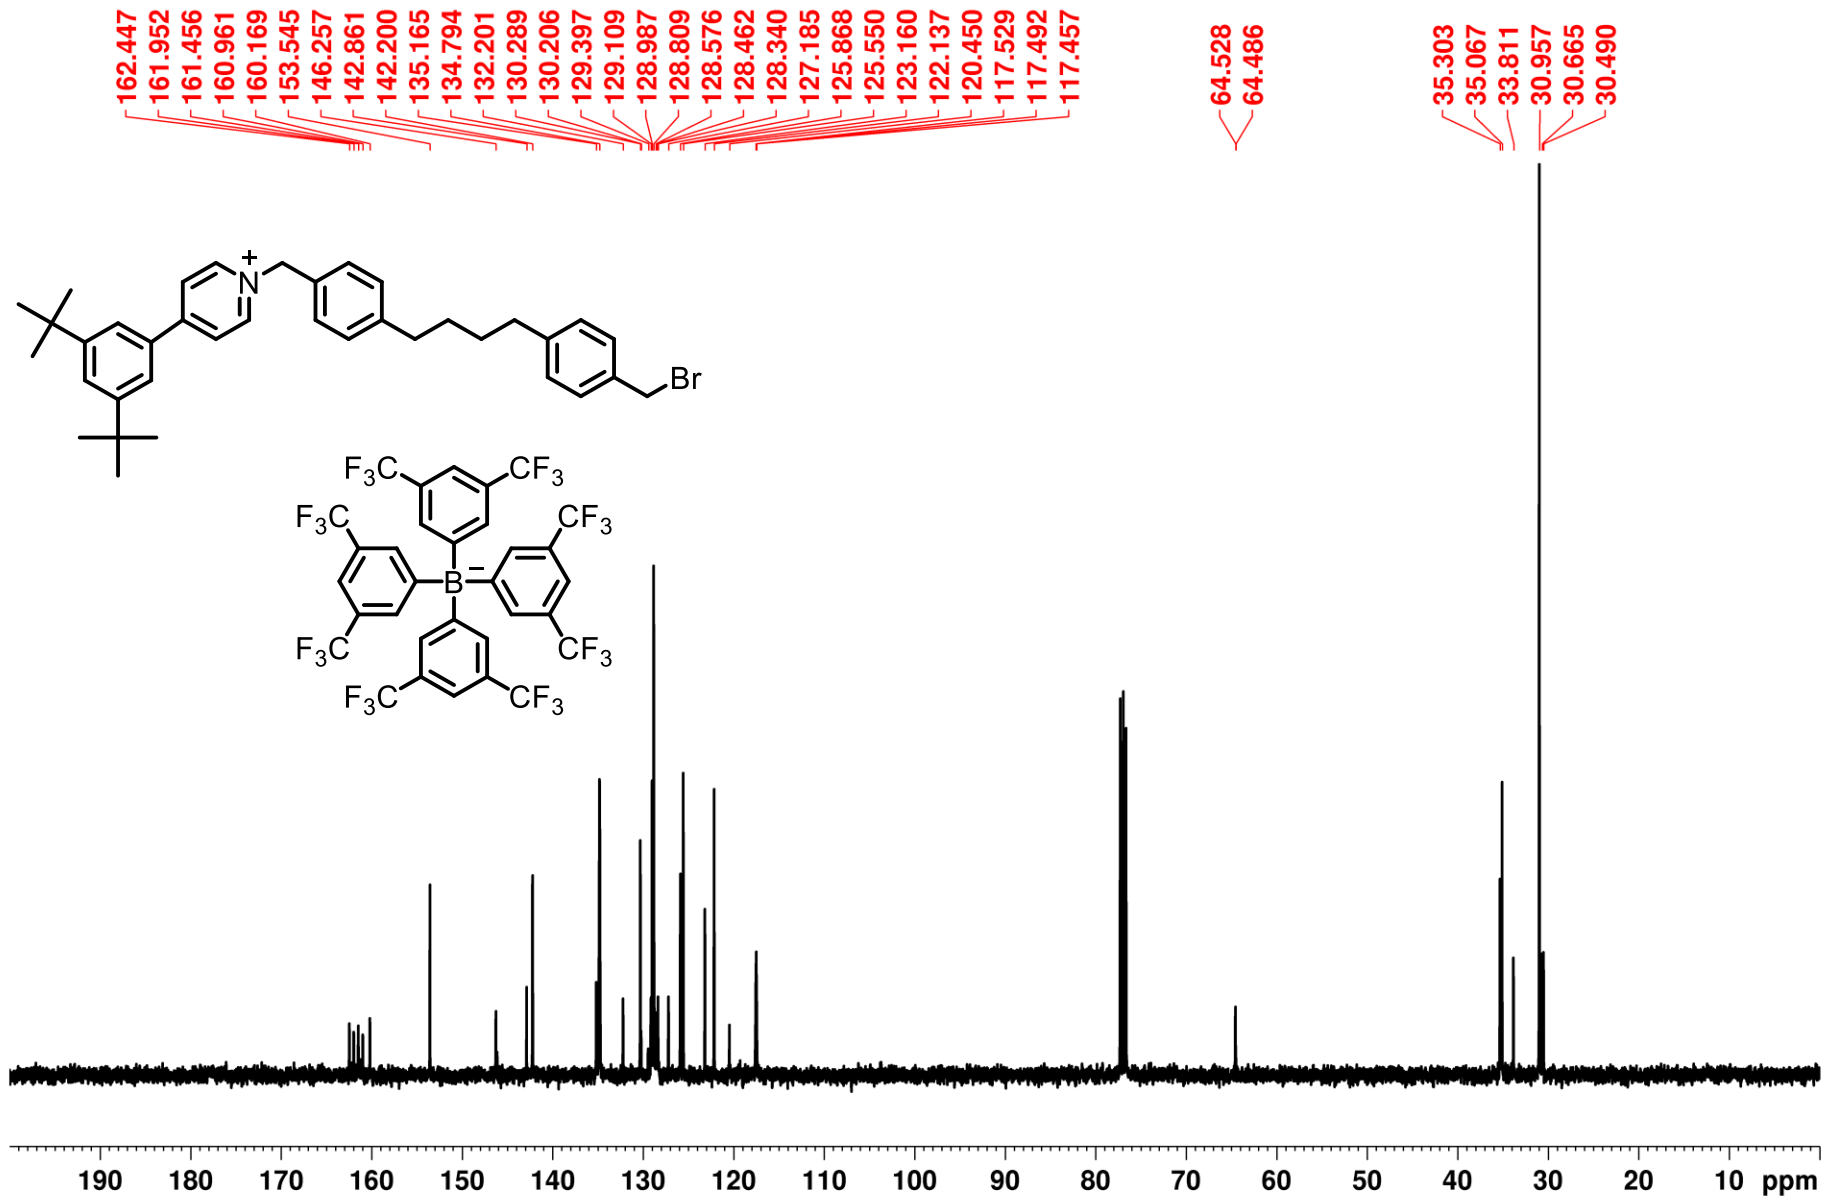

# Figure S3 ESI Mass Spectra of Compound 1•TFPB

## Mass Spectrum SmartFormula Report

### Analysis Info

|               |                                                                          |                   |                       |
|---------------|--------------------------------------------------------------------------|-------------------|-----------------------|
| Analysis Name | D:\Data\Fish\1_Data\2024Q1\240130\240130_pyridine-C4-Br_pw_35_01_34686.d | Acquisition Date  | 1/30/2024 10:47:21 AM |
| Method        | tune_wide_pos_LCMS_with lock mass_220107-3.m                             | Operator          | BDAL@DE               |
| Sample Name   | 240130_pyridine-C4-Br_pw                                                 | Instrument / Ser# | micrOTOF-Q 228888.10  |
| Comment       |                                                                          |                   | 183                   |

### Acquisition Parameter

|             |          |                       |           |                  |           |
|-------------|----------|-----------------------|-----------|------------------|-----------|
| Source Type | ESI      | Ion Polarity          | Positive  | Set Nebulizer    | 2.0 Bar   |
| Focus       | Active   | Set Capillary         | 4500 V    | Set Dry Heater   | 180 °C    |
| Scan Begin  | 50 m/z   | Set End Plate Offset  | -500 V    | Set Dry Gas      | 6.9 l/min |
| Scan End    | 3000 m/z | Set Collision Cell RF | 500.0 Vpp | Set Divert Valve | Waste     |

### +MS, 0.6-0.7min #37-43

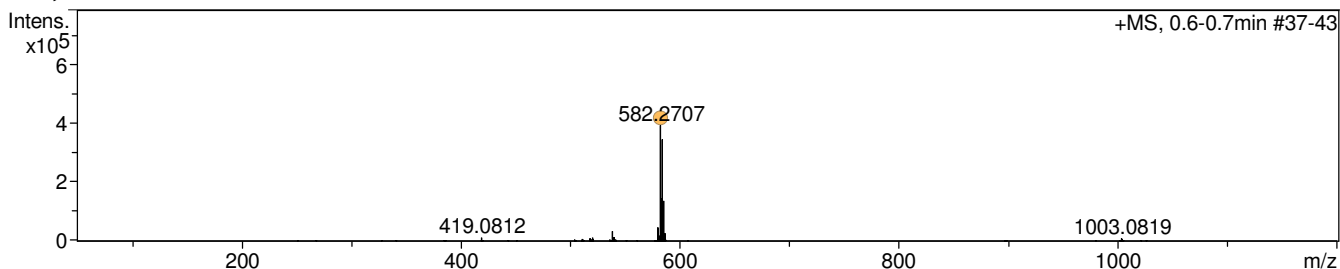

| Meas. m/z | # | Ion Formula | m/z      | err [mDa] | err [ppm] | mSigma | Score  | rdb  | e <sup>-</sup> Conf | N-Rule |
|-----------|---|-------------|----------|-----------|-----------|--------|--------|------|---------------------|--------|
| 582.2707  | 1 | C37H45BrN   | 582.2730 | -2.3      | -4.0      | 55.9   | 100.00 | 15.5 | even                | ok     |

### +MS, 0.6-0.7min #37-43

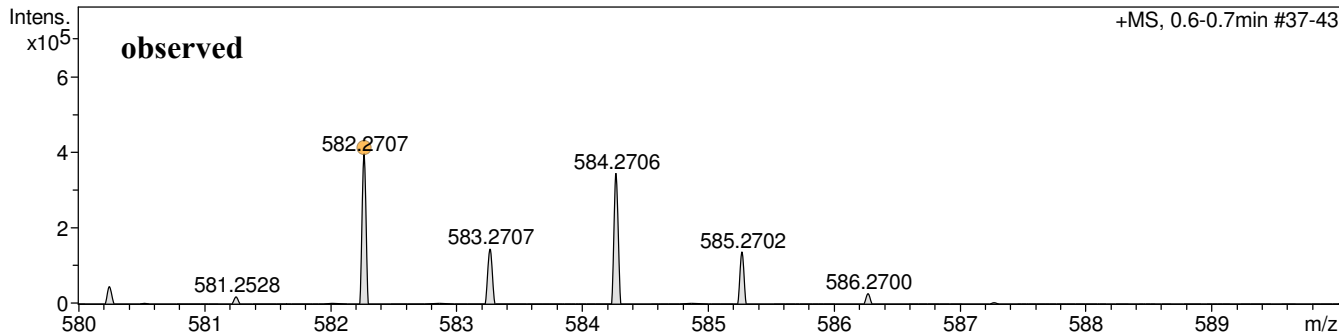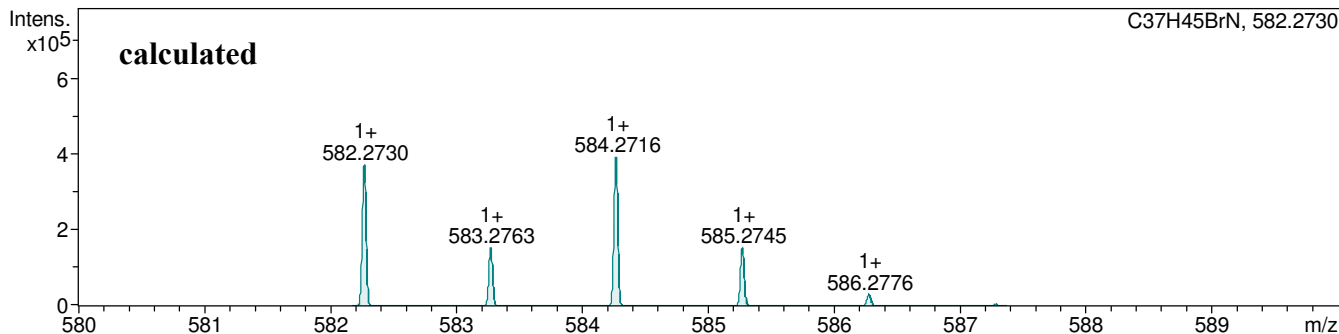

Figure S4  $^1\text{H}$  NMR Spectrum (400 MHz /  $\text{CD}_2\text{Cl}_2$  / 298 K) of  $3 \cdot 2\text{TFPB}$

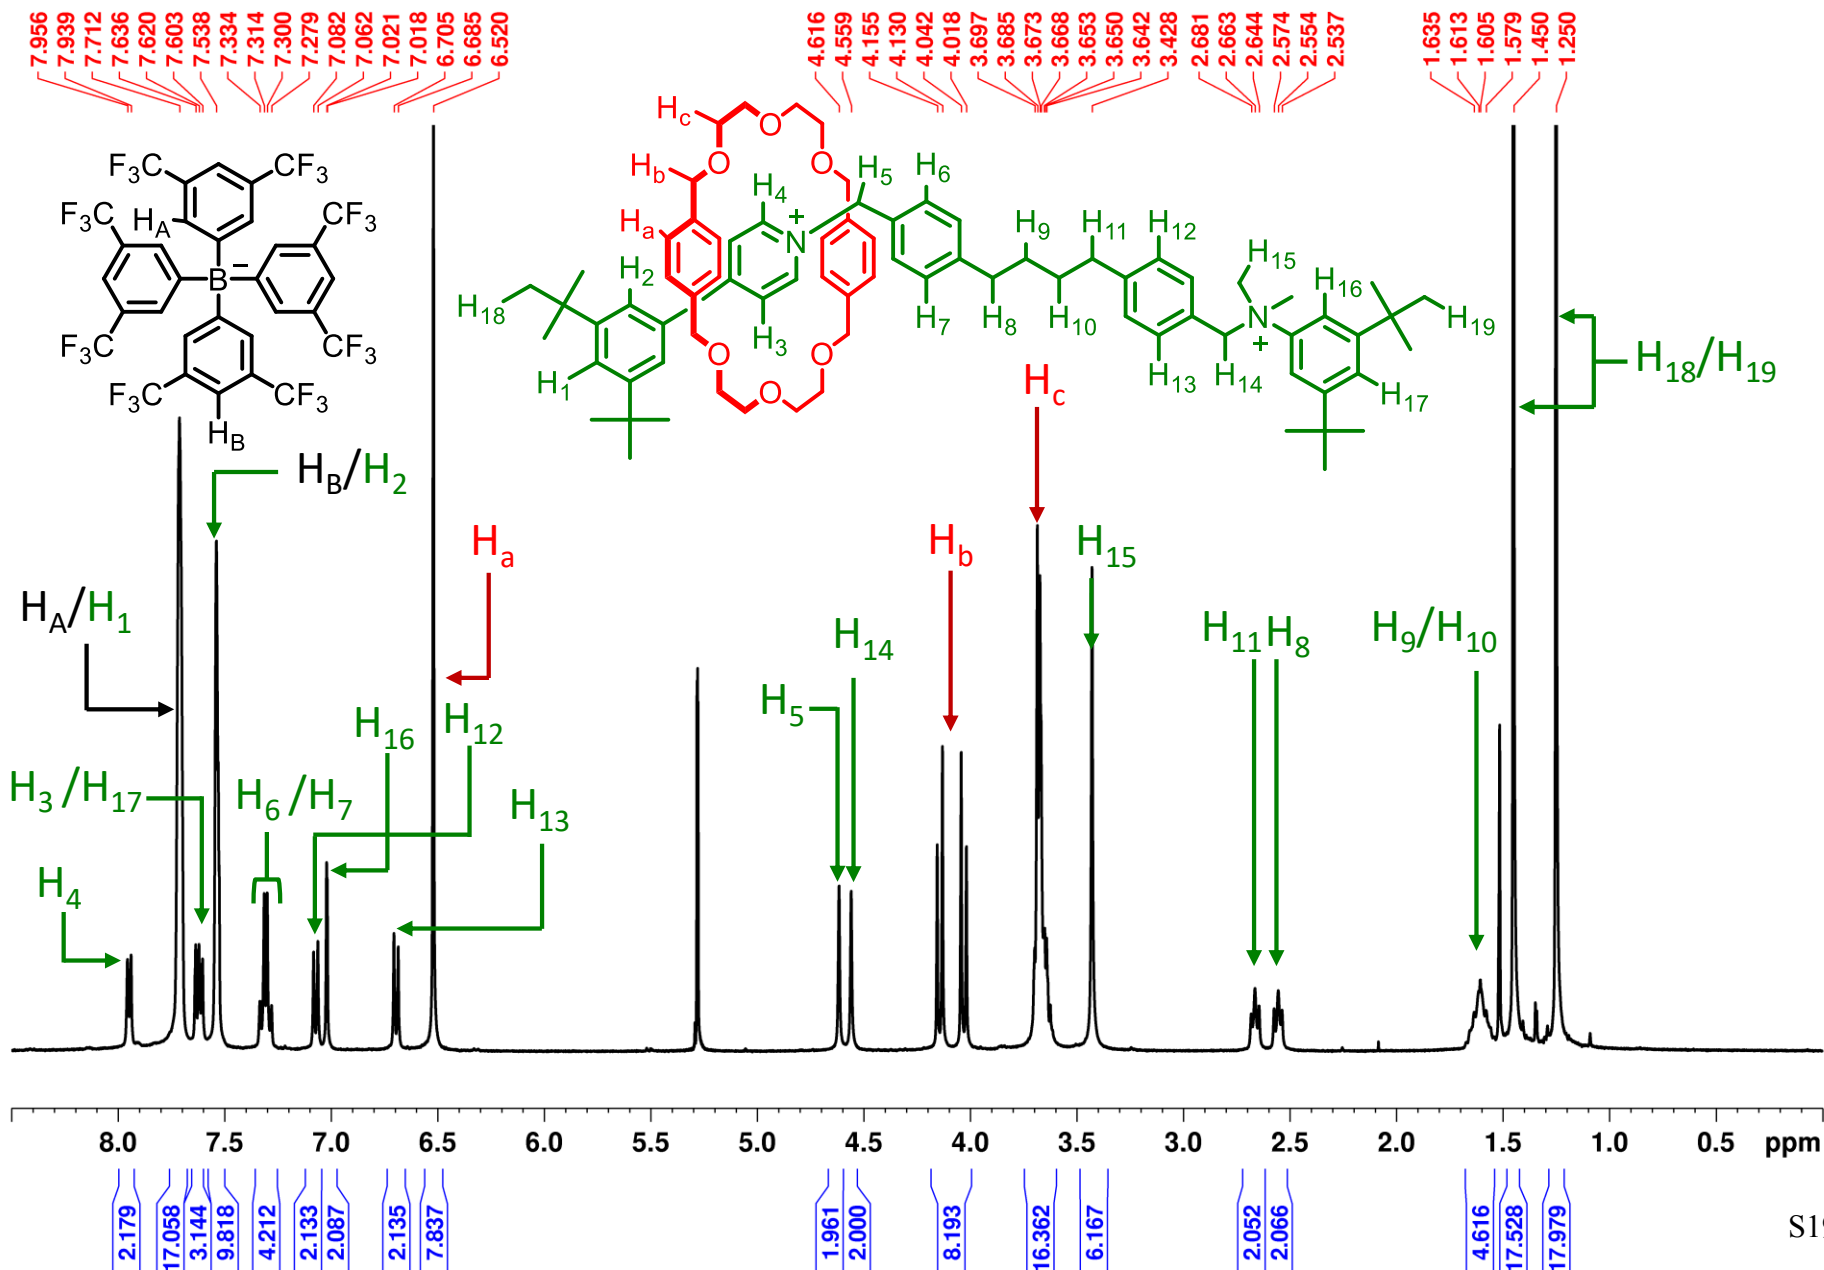

Figure S5  $^{13}\text{C}$  NMR Spectrum (100 MHz /  $\text{CDCl}_3$  / 298 K) of  $3 \cdot 2\text{TFPB}$

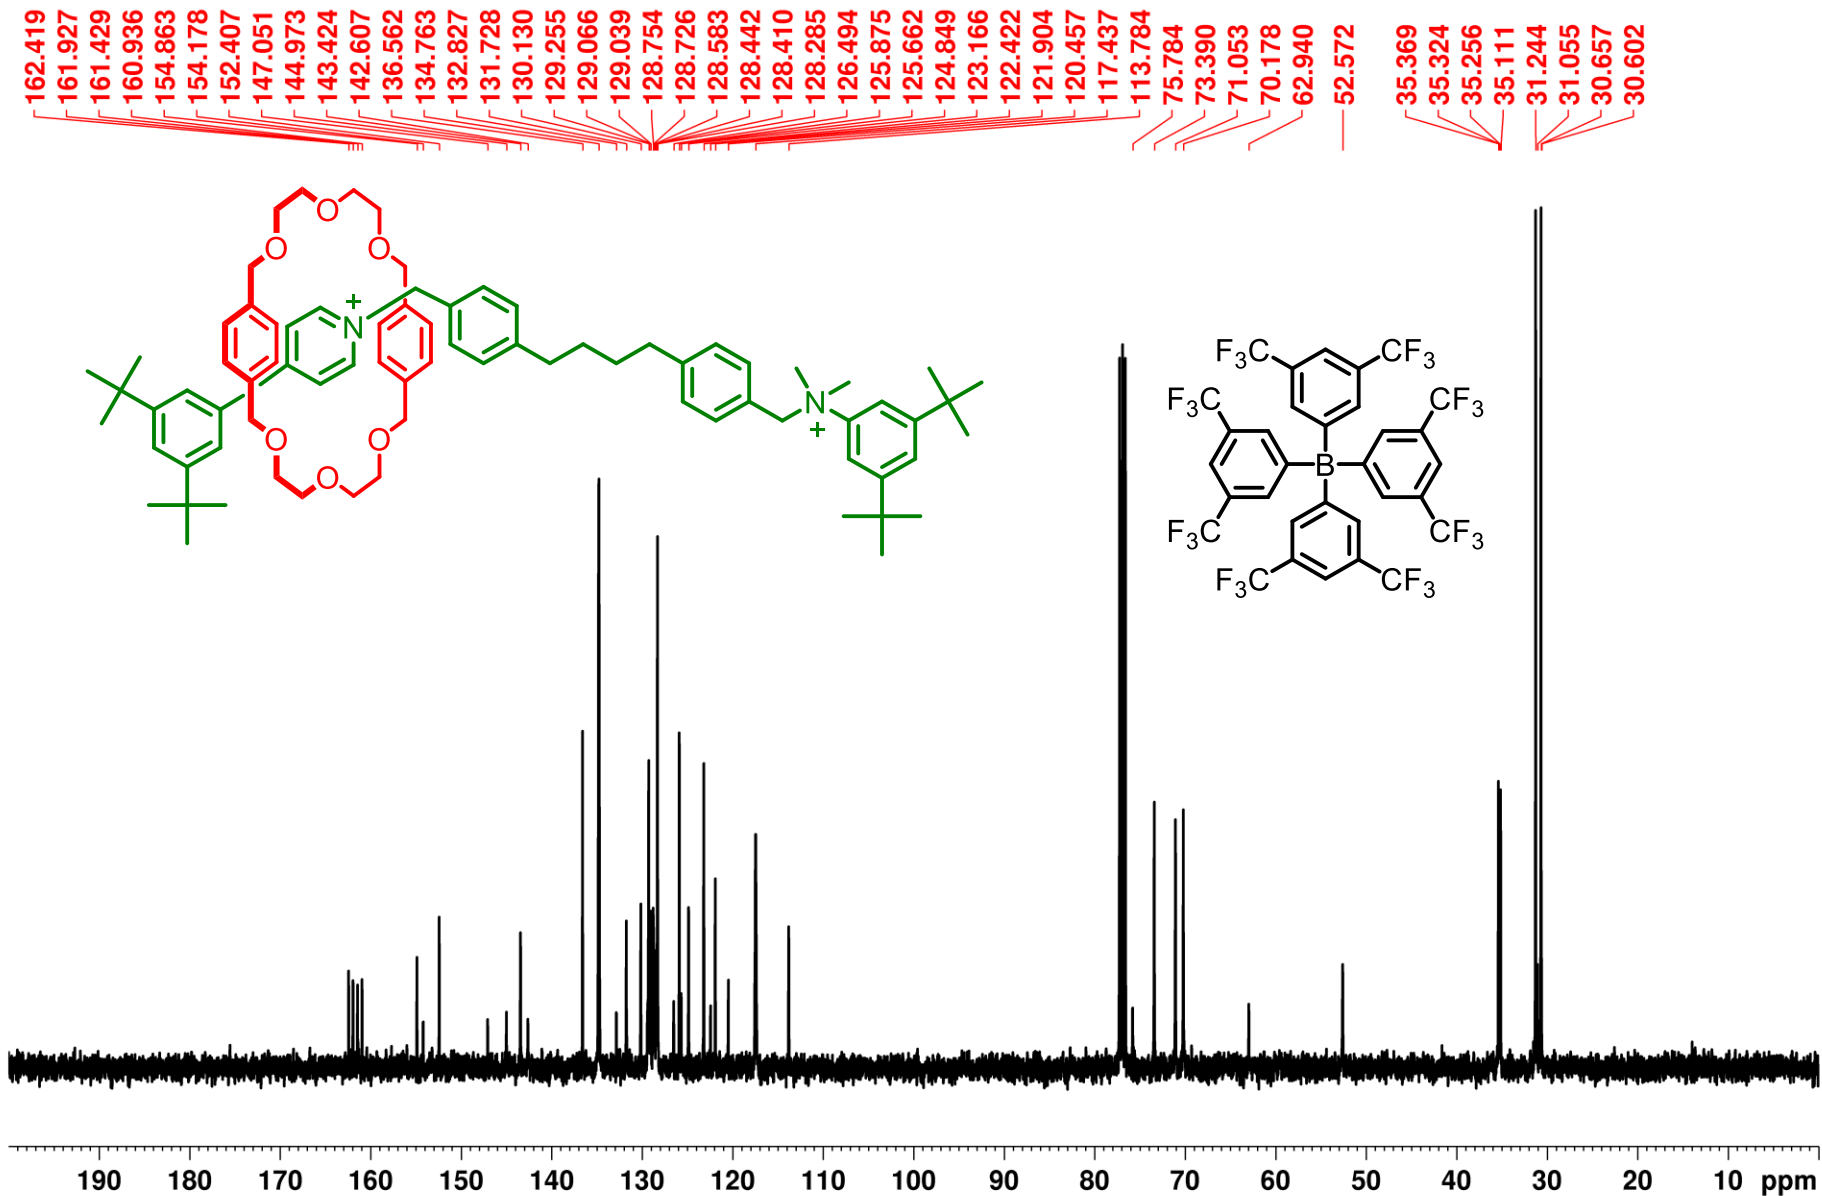

# Figure S6 ESI Mass Spectra of Compound 3•2TFPB

## Mass Spectrum SmartFormula Report

### Analysis Info

Analysis Name D:\Data\fish\data\2023q2(datas)\230529\230529\_pyridine-rot-C4\_pw\_1-72\_01\_53567.d  
Method tune\_wide\_pos\_LCMS\_with lock mass\_220107-3.m  
Sample Name 230529\_pyridine-rot-C4\_pw  
Comment  
Acquisition Date 5/29/2023 9:54:04 AM  
Operator Bruker microTOF-Q II  
Instrument / Ser# micrOTOF-Q 228888.10  
183

### Acquisition Parameter

|             |          |                       |           |                  |           |
|-------------|----------|-----------------------|-----------|------------------|-----------|
| Source Type | ESI      | Ion Polarity          | Positive  | Set Nebulizer    | 2.0 Bar   |
| Focus       | Active   | Set Capillary         | 4500 V    | Set Dry Heater   | 180 °C    |
| Scan Begin  | 50 m/z   | Set End Plate Offset  | -500 V    | Set Dry Gas      | 6.9 l/min |
| Scan End    | 3000 m/z | Set Collision Cell RF | 500.0 Vpp | Set Divert Valve | Waste     |

### +MS, 1.2-1.3min #70-78

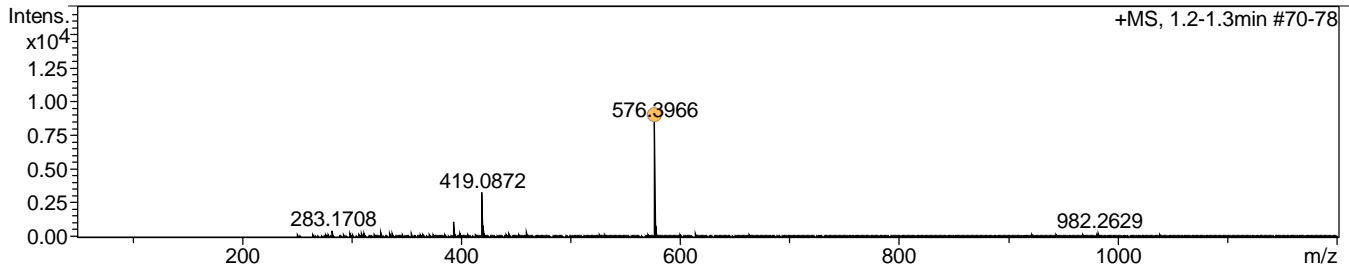

| Meas. m/z | # | Ion Formula | m/z      | err [mDa] | err [ppm] | mSigma | Score  | rdb  | e <sup>-</sup> | Conf | N-Rule |
|-----------|---|-------------|----------|-----------|-----------|--------|--------|------|----------------|------|--------|
| 576.3966  | 1 | C77H104N2O6 | 576.3942 | -2.4      | -4.2      | 29.6   | 100.00 | 27.0 | even           |      | ok     |

### +MS, 1.2-1.3min #70-78

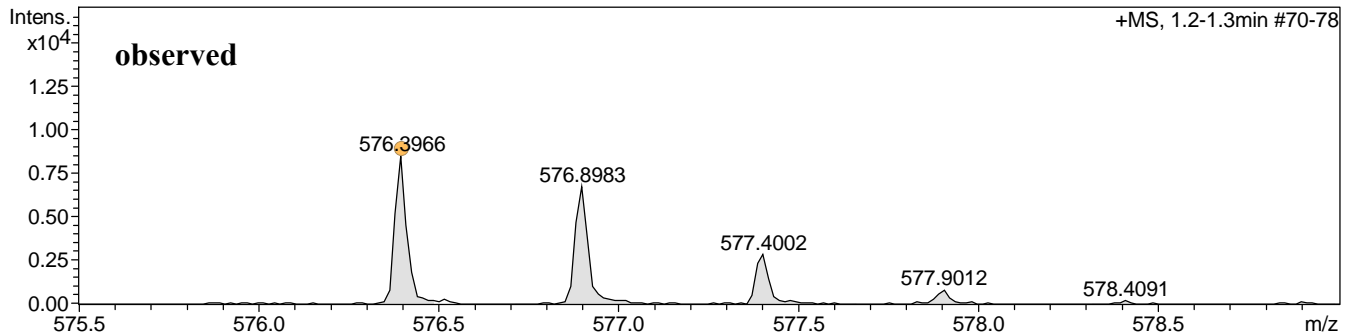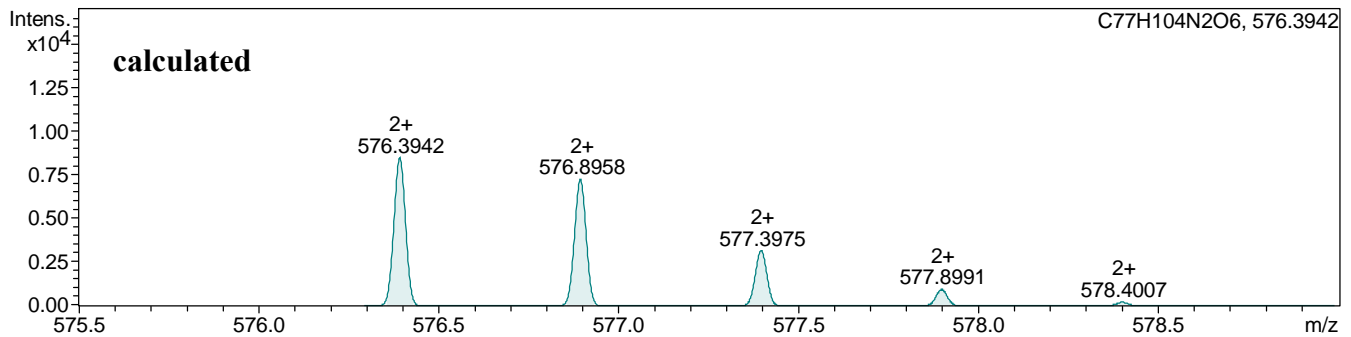

Figure S7  $^1\text{H}$  NMR Spectrum (400 MHz /  $\text{CD}_3\text{CN}$  / 298 K) of  $4 \cdot \text{TFPB}$

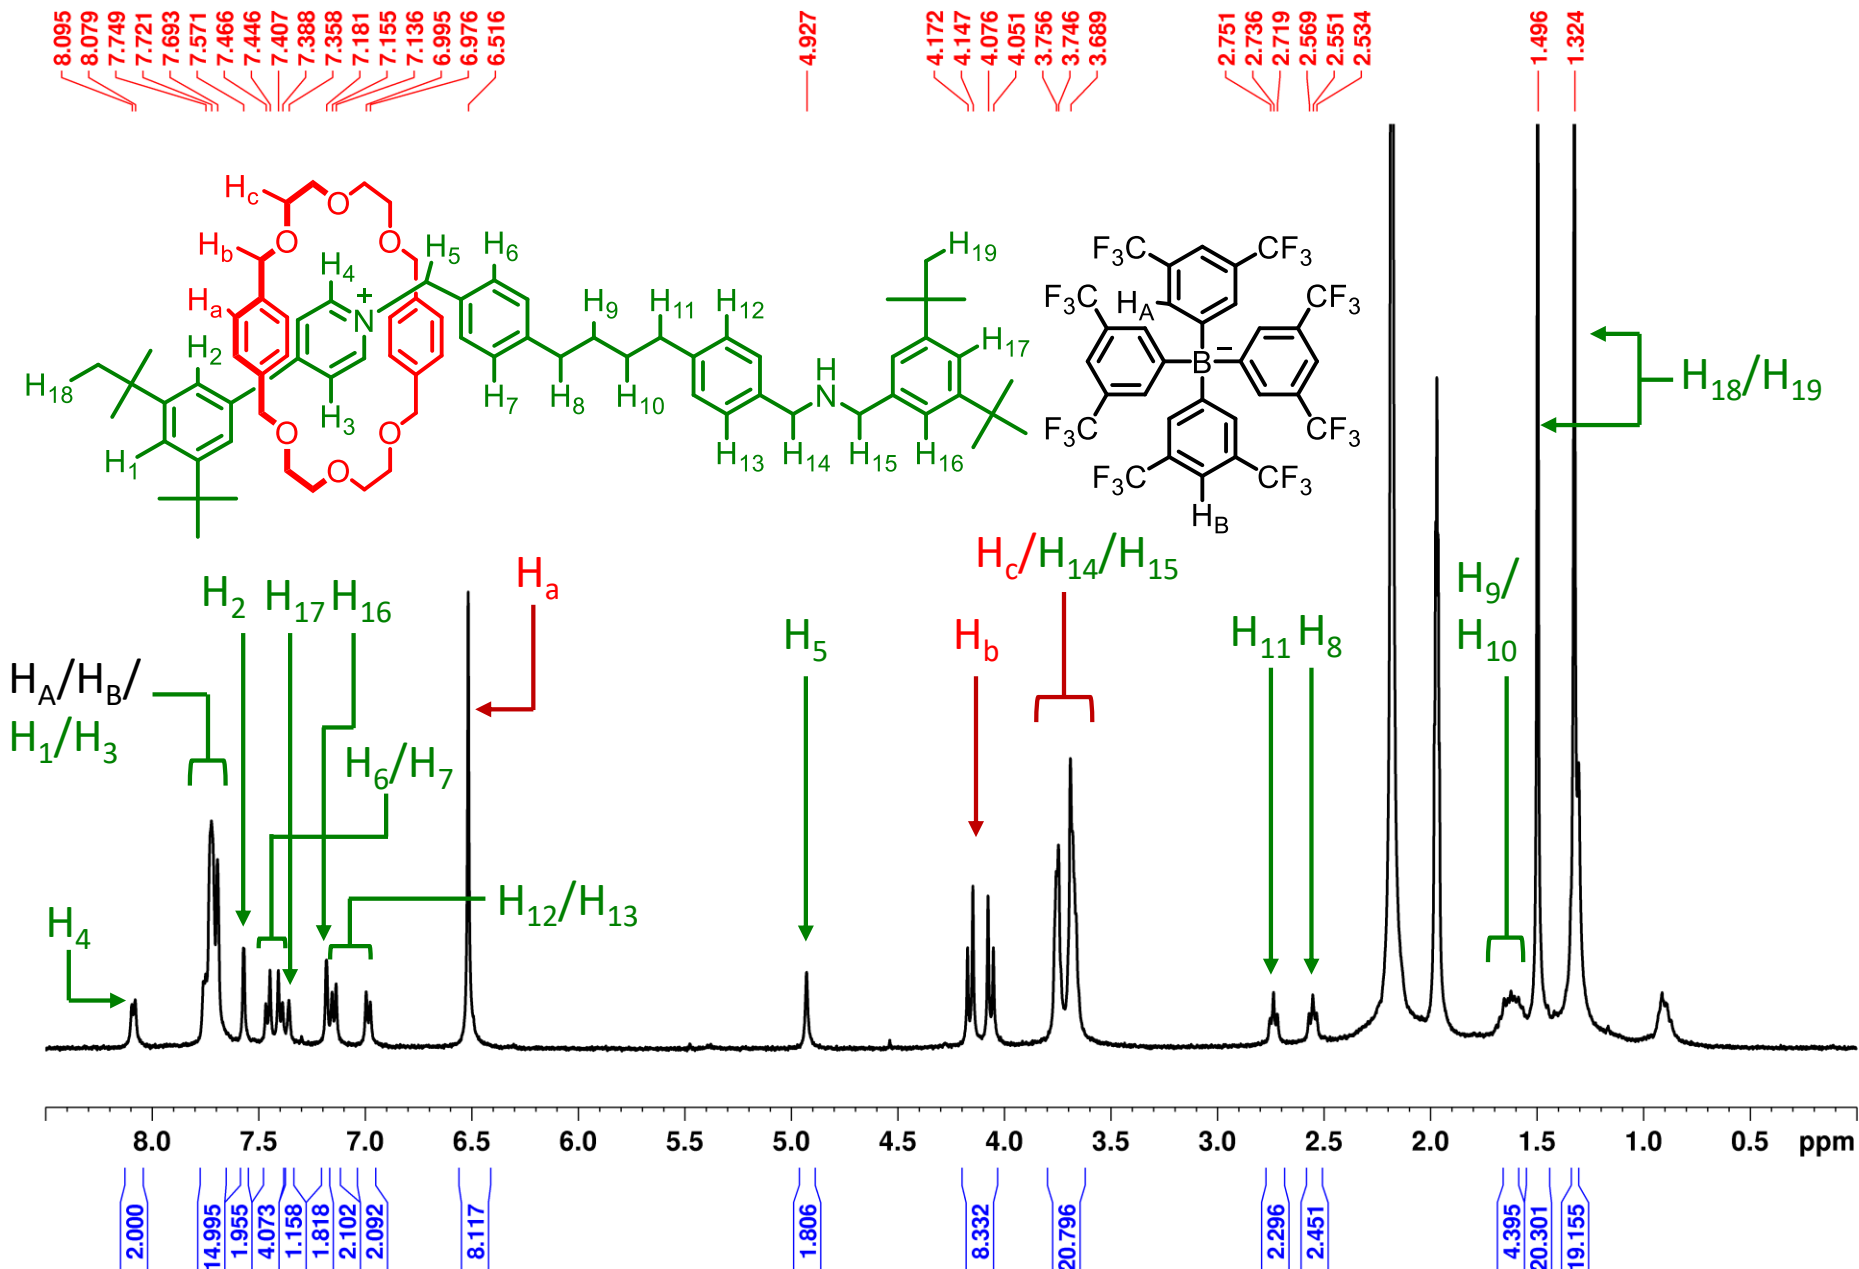

Figure S8  $^{13}\text{C}$  NMR Spectrum (100 MHz /  $\text{CD}_2\text{Cl}_2$  / 298 K) of Rotaxane **4**·TFPB

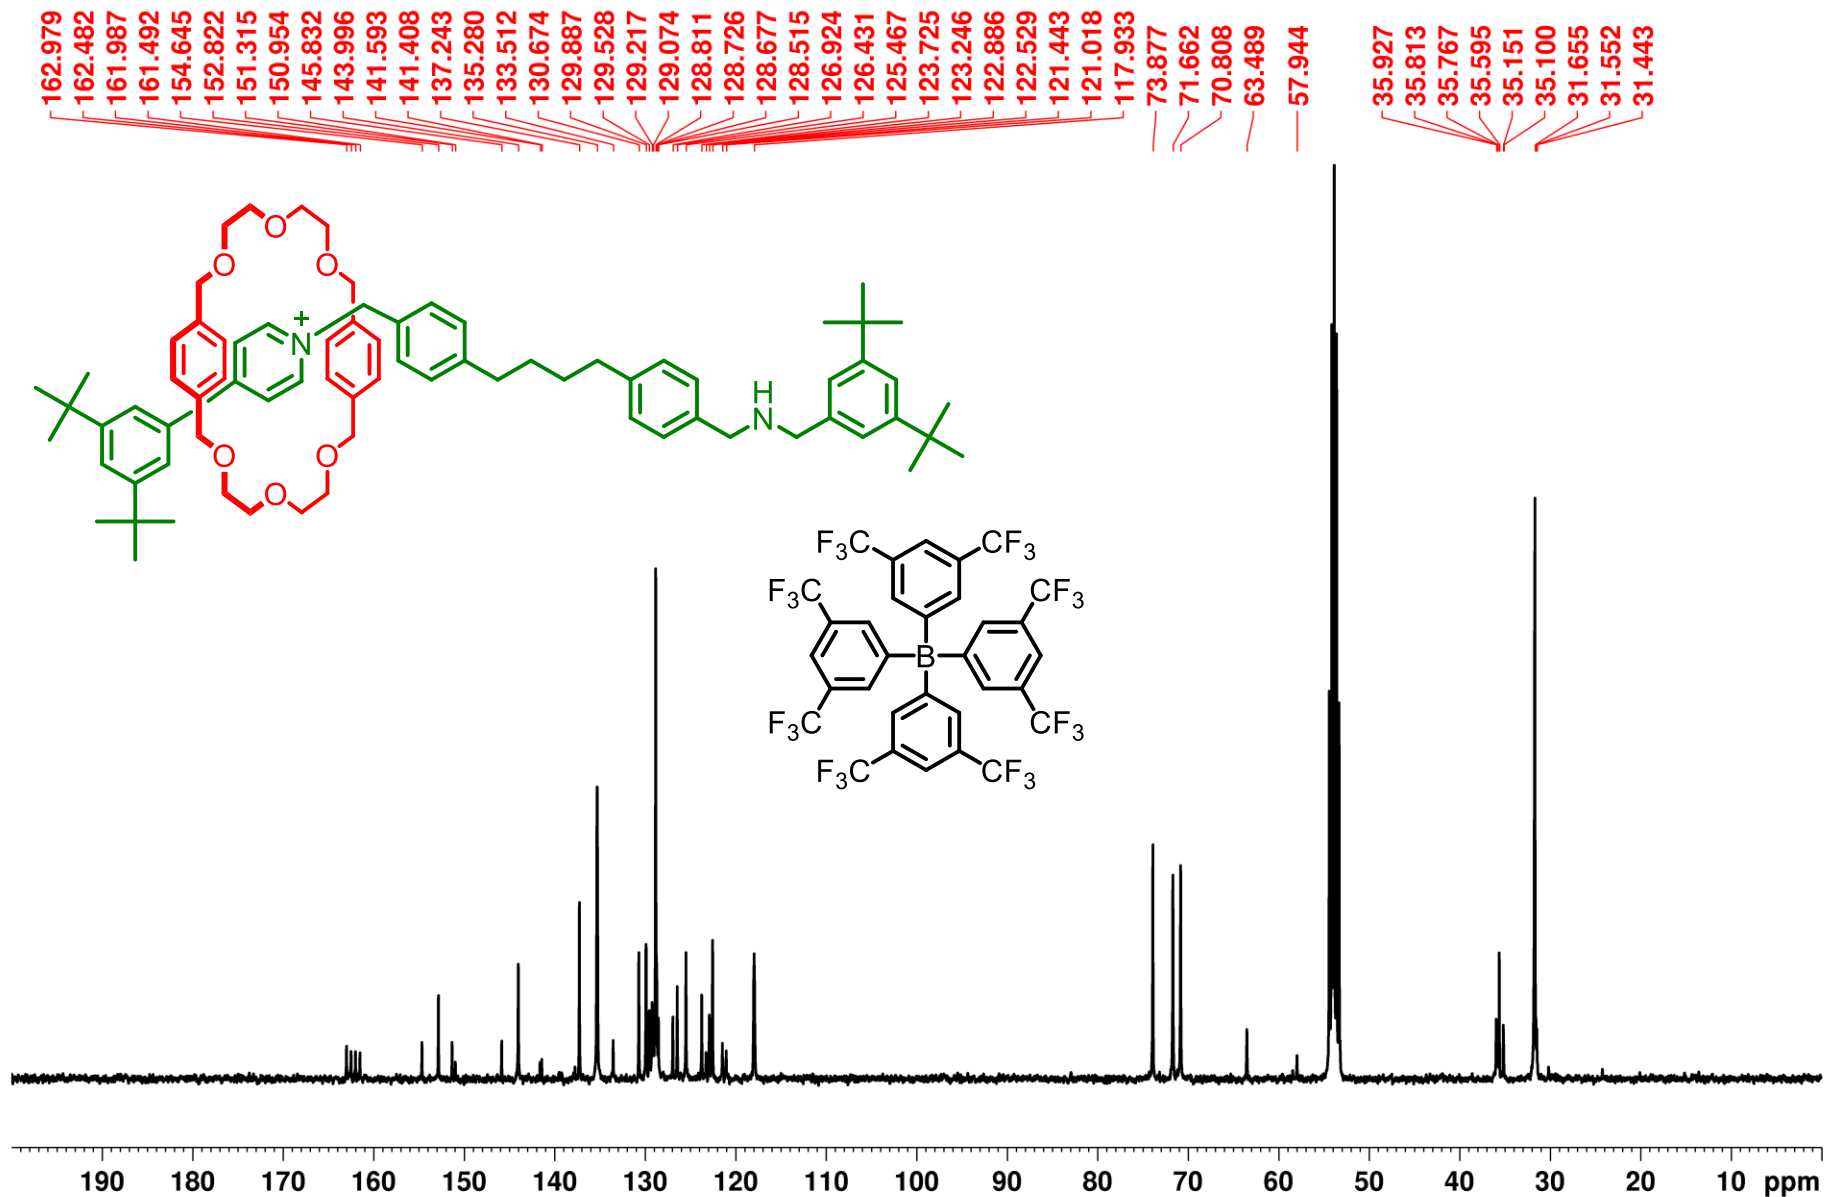

# Figure S9 ESI Mass Spectra of Compound 4•TFPB

## Mass Spectrum SmartFormula Report

### Analysis Info

Analysis Name D:\Data\Fish\Data\2023Q3(datas)\230721\230721\_amide-C4-rot-amineH\_pw\_1-61\_01\_54413.d  
Method tune\_wide\_pos\_LCMS\_with lock mass\_220107-3.m  
Sample Name 230721\_amide-C4-rot-amineH\_pw  
Comment

Acquisition Date 7/21/2023 12:03:10 PM  
Operator Bruker microTOF-Q II  
Instrument / Ser# micrOTOF-Q 228888.10  
183

### Acquisition Parameter

|             |          |                       |           |                  |           |
|-------------|----------|-----------------------|-----------|------------------|-----------|
| Source Type | ESI      | Ion Polarity          | Positive  | Set Nebulizer    | 2.0 Bar   |
| Focus       | Active   | Set Capillary         | 4500 V    | Set Dry Heater   | 180 °C    |
| Scan Begin  | 50 m/z   | Set End Plate Offset  | -500 V    | Set Dry Gas      | 6.9 l/min |
| Scan End    | 3000 m/z | Set Collision Cell RF | 500.0 Vpp | Set Divert Valve | Waste     |

### +MS, 0.2-0.2min #10-12

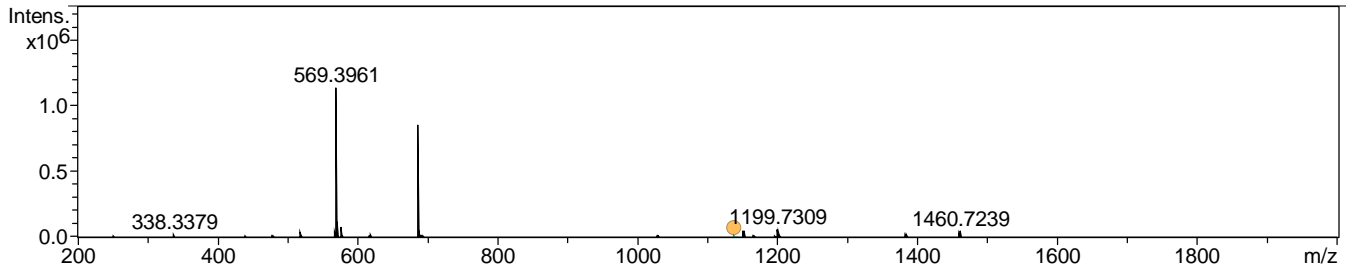

| Meas. m/z | # | Ion Formula | m/z       | err [mDa] | err [ppm] | mSigma | Score  | rdb  | e <sup>-</sup> | Conf | N-Rule |
|-----------|---|-------------|-----------|-----------|-----------|--------|--------|------|----------------|------|--------|
| 1137.7687 | 1 | C76H101N2O6 | 1137.7654 | -3.3      | -2.9      | 20.5   | 100.00 | 27.5 | even           |      | ok     |

### +MS, 0.2-0.2min #10-12

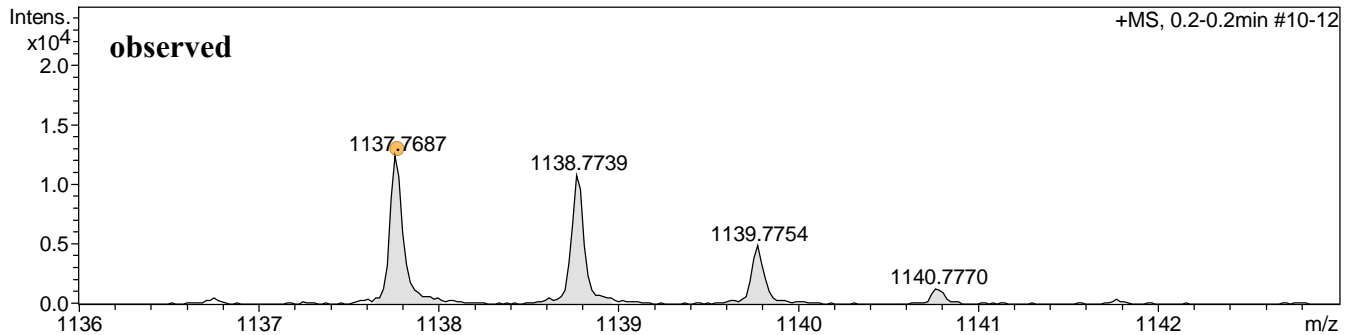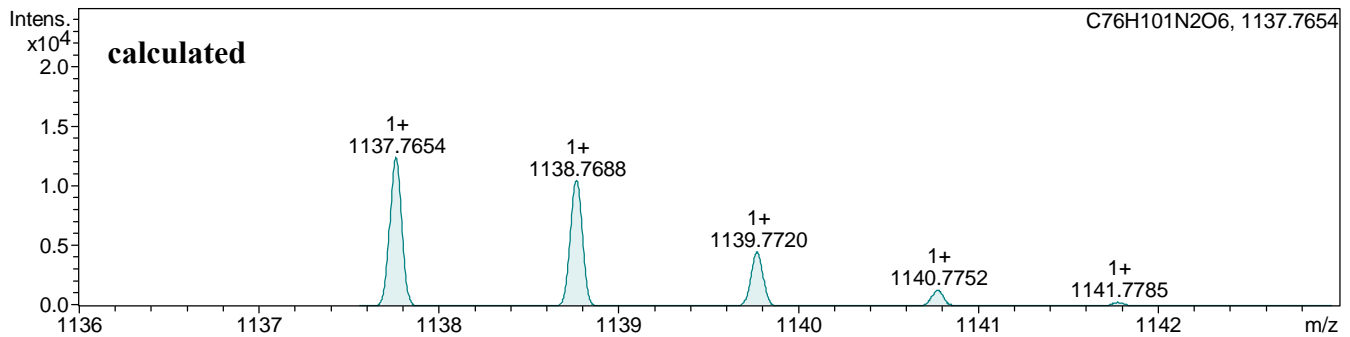



Figure S10  $^1\text{H}$  NMR Spectrum (400 MHz /  $\text{CD}_2\text{Cl}_2$  / 298 K) of  $5 \cdot \text{TFPB}$

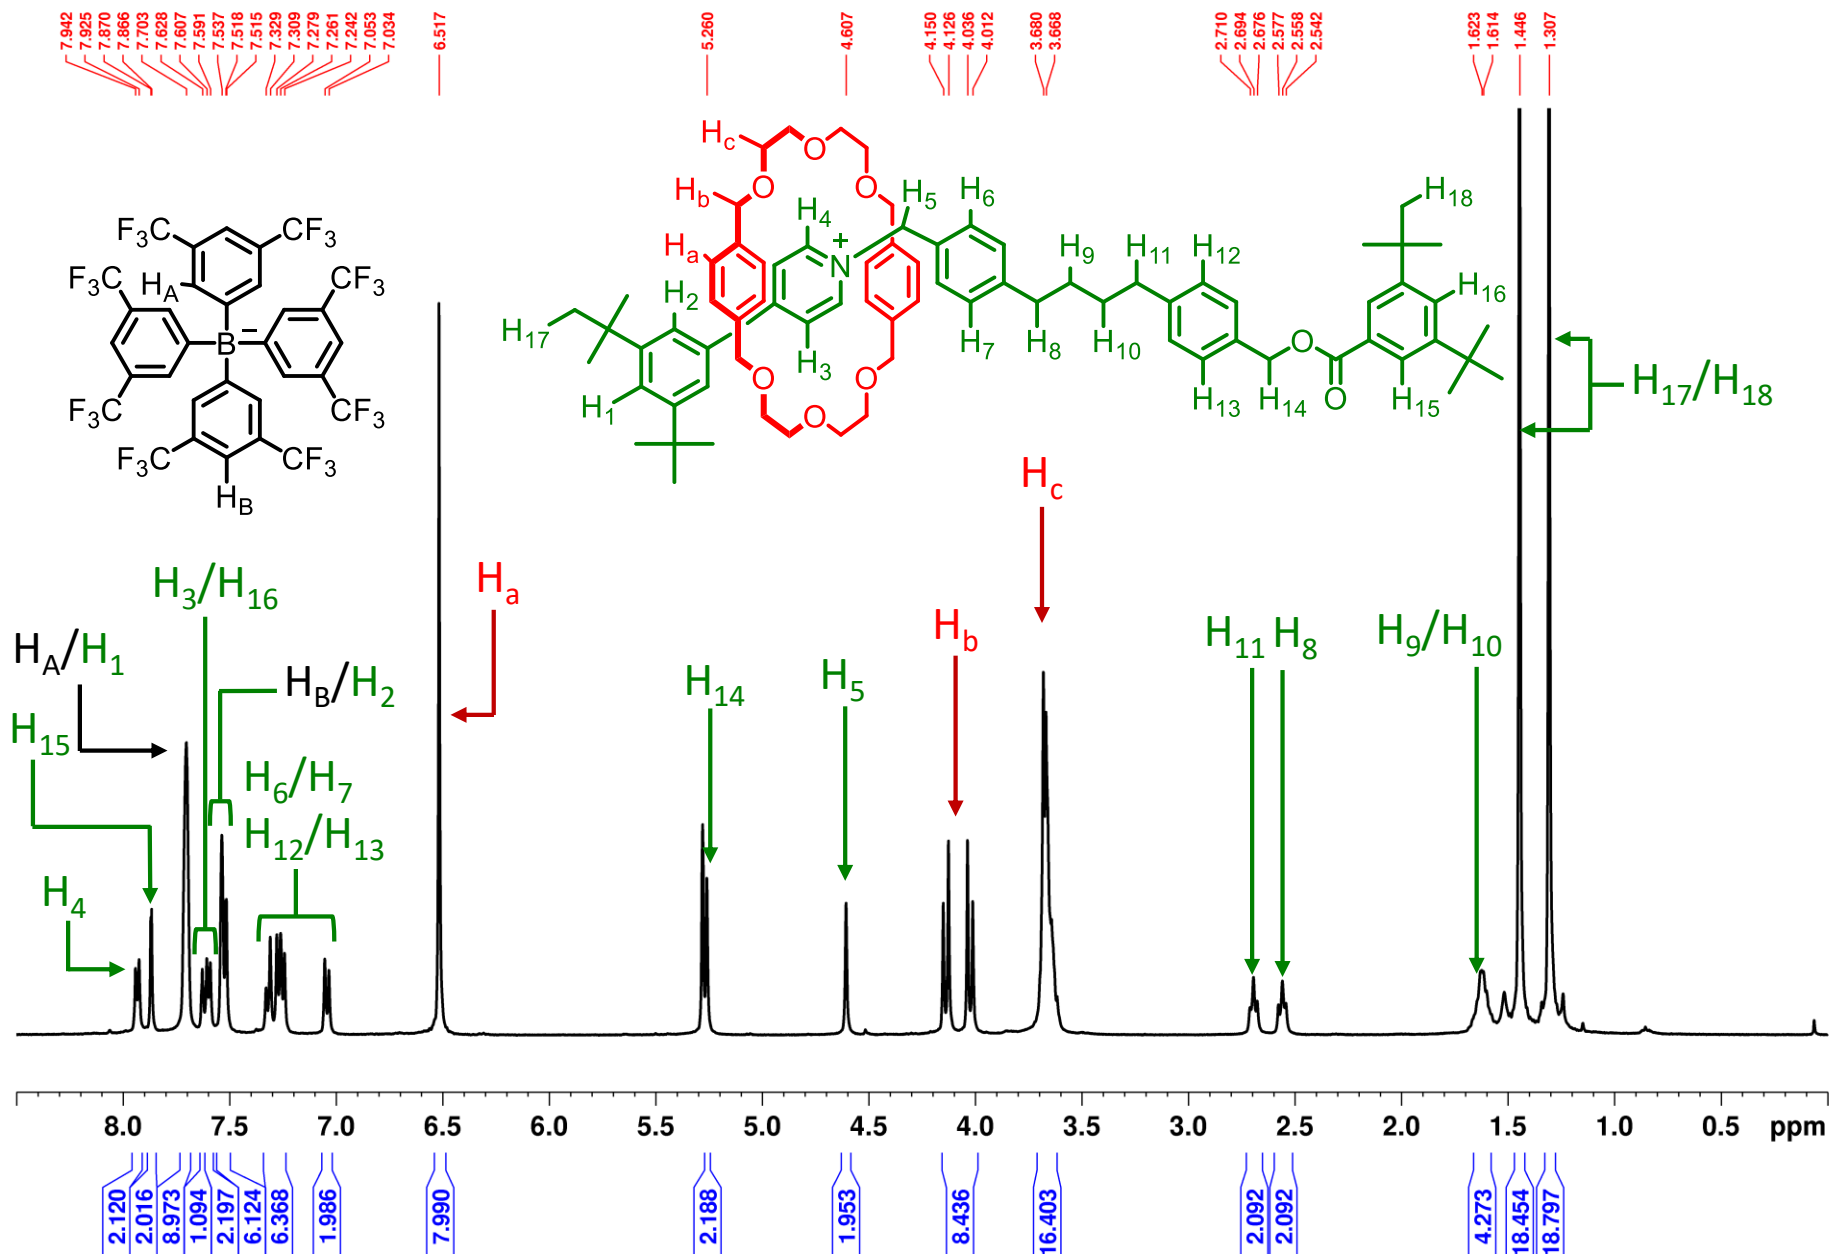

Figure S11  $^{13}\text{C}$  NMR Spectrum (100 MHz /  $\text{CDCl}_3$  / 298 K) of  $5 \cdot \text{TFPB}$

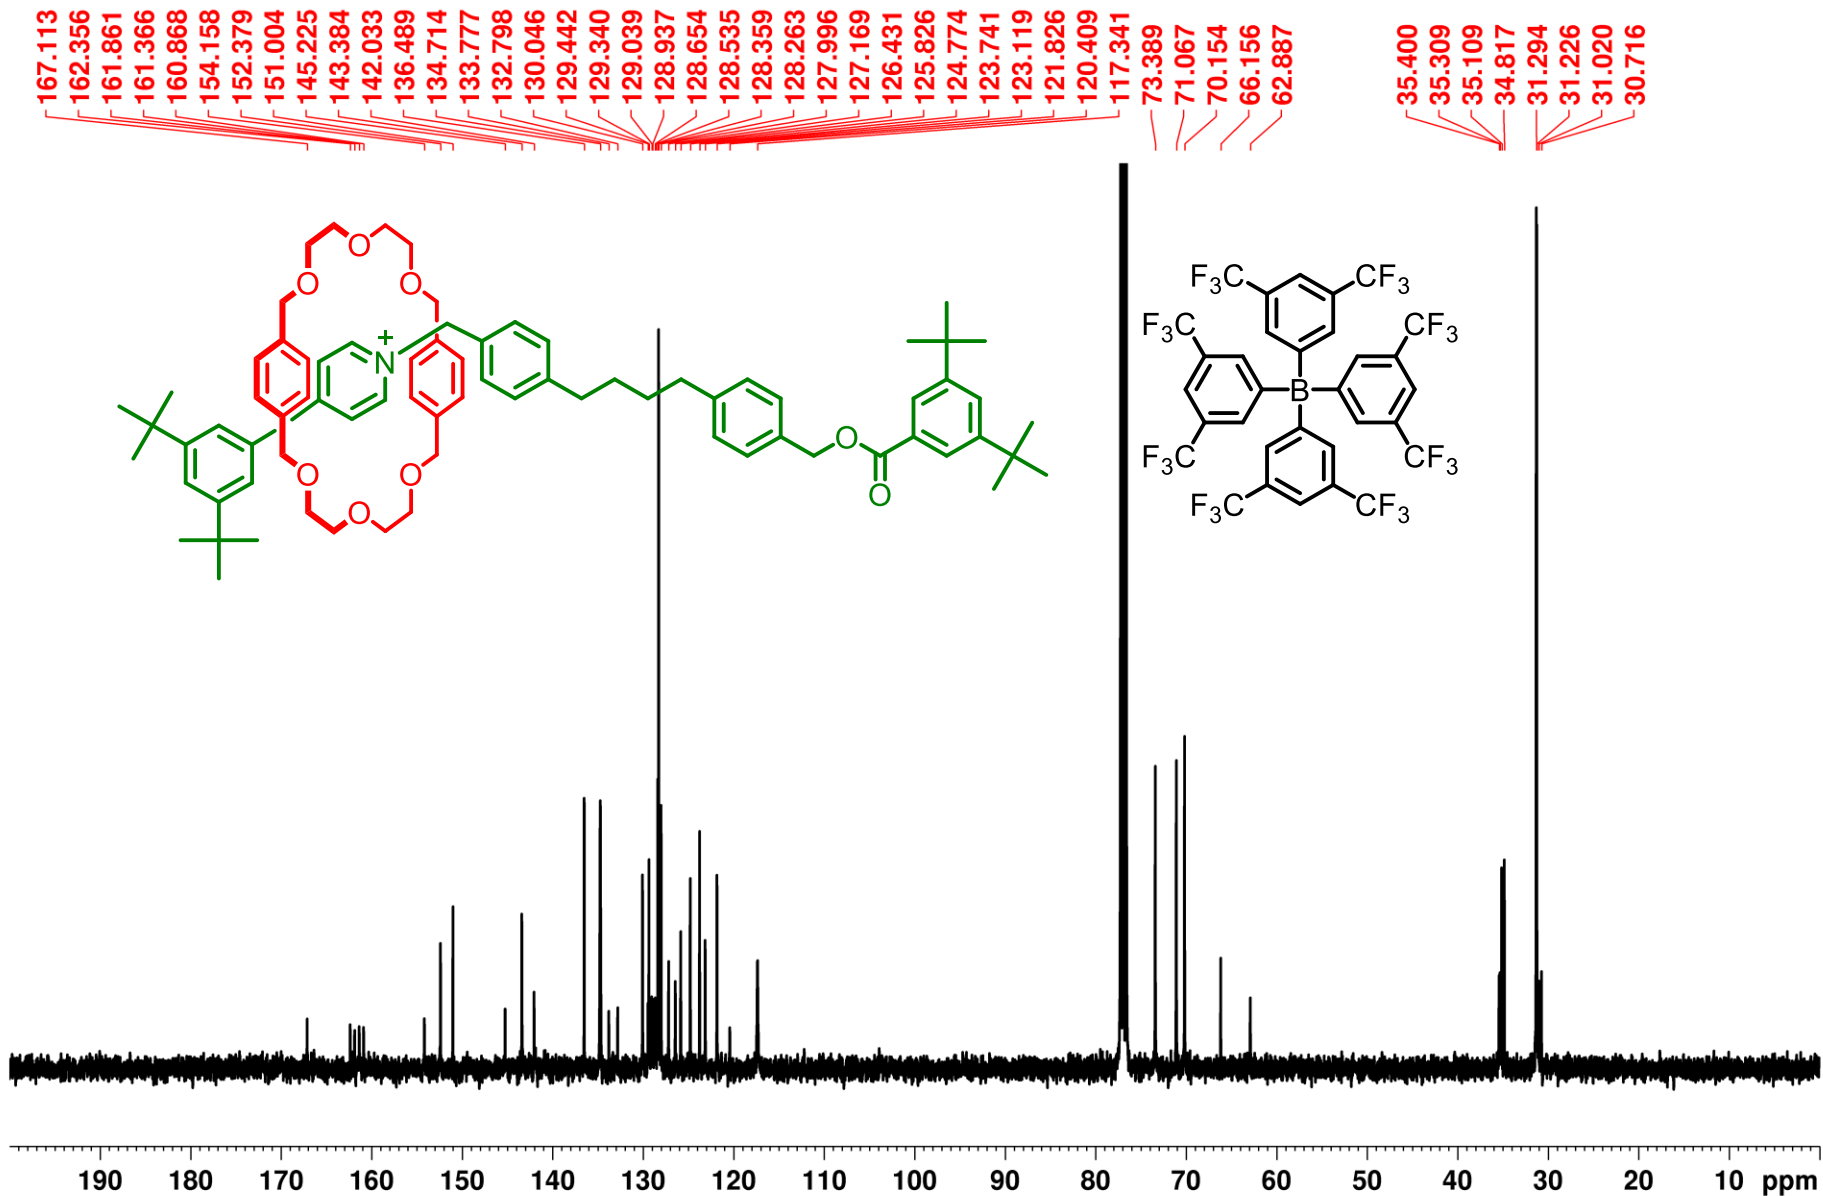

# Figure S12 ESI Mass Spectra of Compound 5•TFPB

## Mass Spectrum SmartFormula Report

### Analysis Info

Analysis Name D:\Data\fish\data\2023q2(datas)\230529\230529\_pyridine-rot-C4-acid\_pw\_1-75\_01\_53573.d  
Method tune\_wide\_pos\_LCMS\_with lock mass\_220107-3.m  
Sample Name 230529\_pyridine-rot-C4-acid\_pw  
Comment

Acquisition Date 5/29/2023 10:28:21 AM  
Operator Bruker microTOF-Q II  
Instrument / Ser# micrOTOF-Q 228888.10  
183

### Acquisition Parameter

|             |          |                       |           |                  |           |
|-------------|----------|-----------------------|-----------|------------------|-----------|
| Source Type | ESI      | Ion Polarity          | Positive  | Set Nebulizer    | 2.0 Bar   |
| Focus       | Active   | Set Capillary         | 4500 V    | Set Dry Heater   | 180 °C    |
| Scan Begin  | 50 m/z   | Set End Plate Offset  | -500 V    | Set Dry Gas      | 6.9 l/min |
| Scan End    | 3000 m/z | Set Collision Cell RF | 500.0 Vpp | Set Divert Valve | Waste     |

### +MS, 0.3-0.3min #17-19

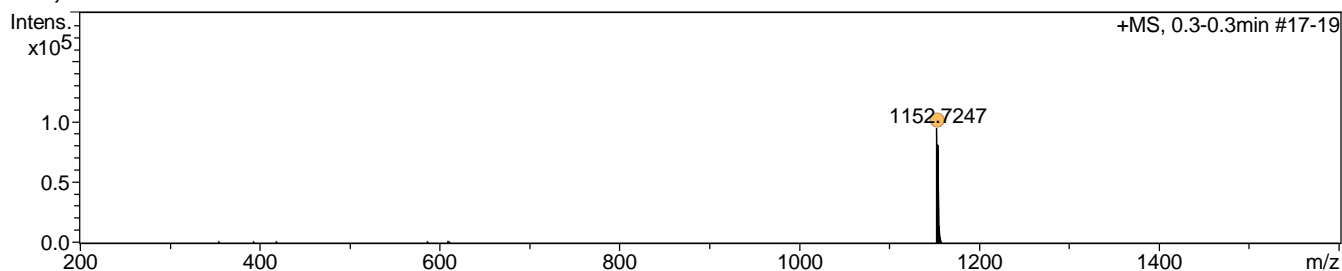

| Meas. m/z | # | Ion Formula | m/z       | err [mDa] | err [ppm] | mSigma | Score  | rdb  | e <sup>-</sup> | Conf | N-Rule |
|-----------|---|-------------|-----------|-----------|-----------|--------|--------|------|----------------|------|--------|
| 1152.7247 | 1 | C76H98NO8   | 1152.7287 | -4.0      | -3.5      | 56.5   | 100.00 | 28.5 | even           |      | ok     |

### +MS, 0.3-0.3min #17-19

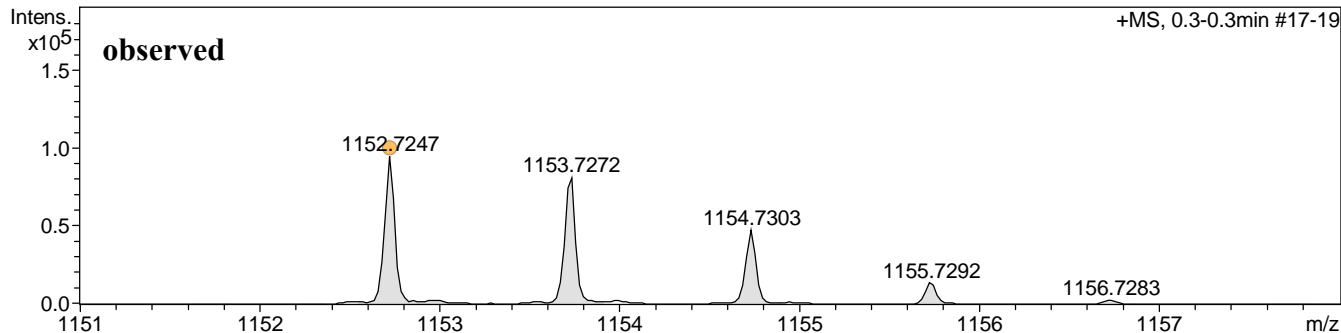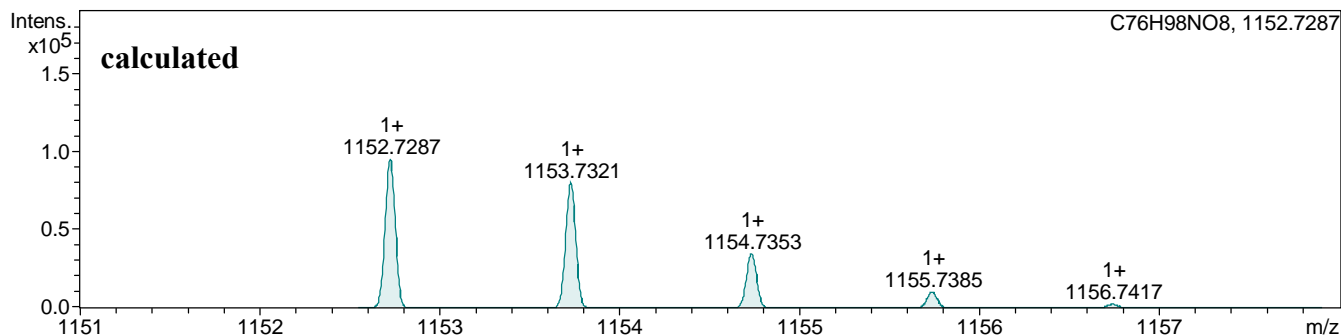

Figure S13  $^1\text{H}$  NMR Spectrum (400 MHz /  $\text{CD}_2\text{Cl}_2$  / 298 K) of  $6 \cdot \text{TFPB}$

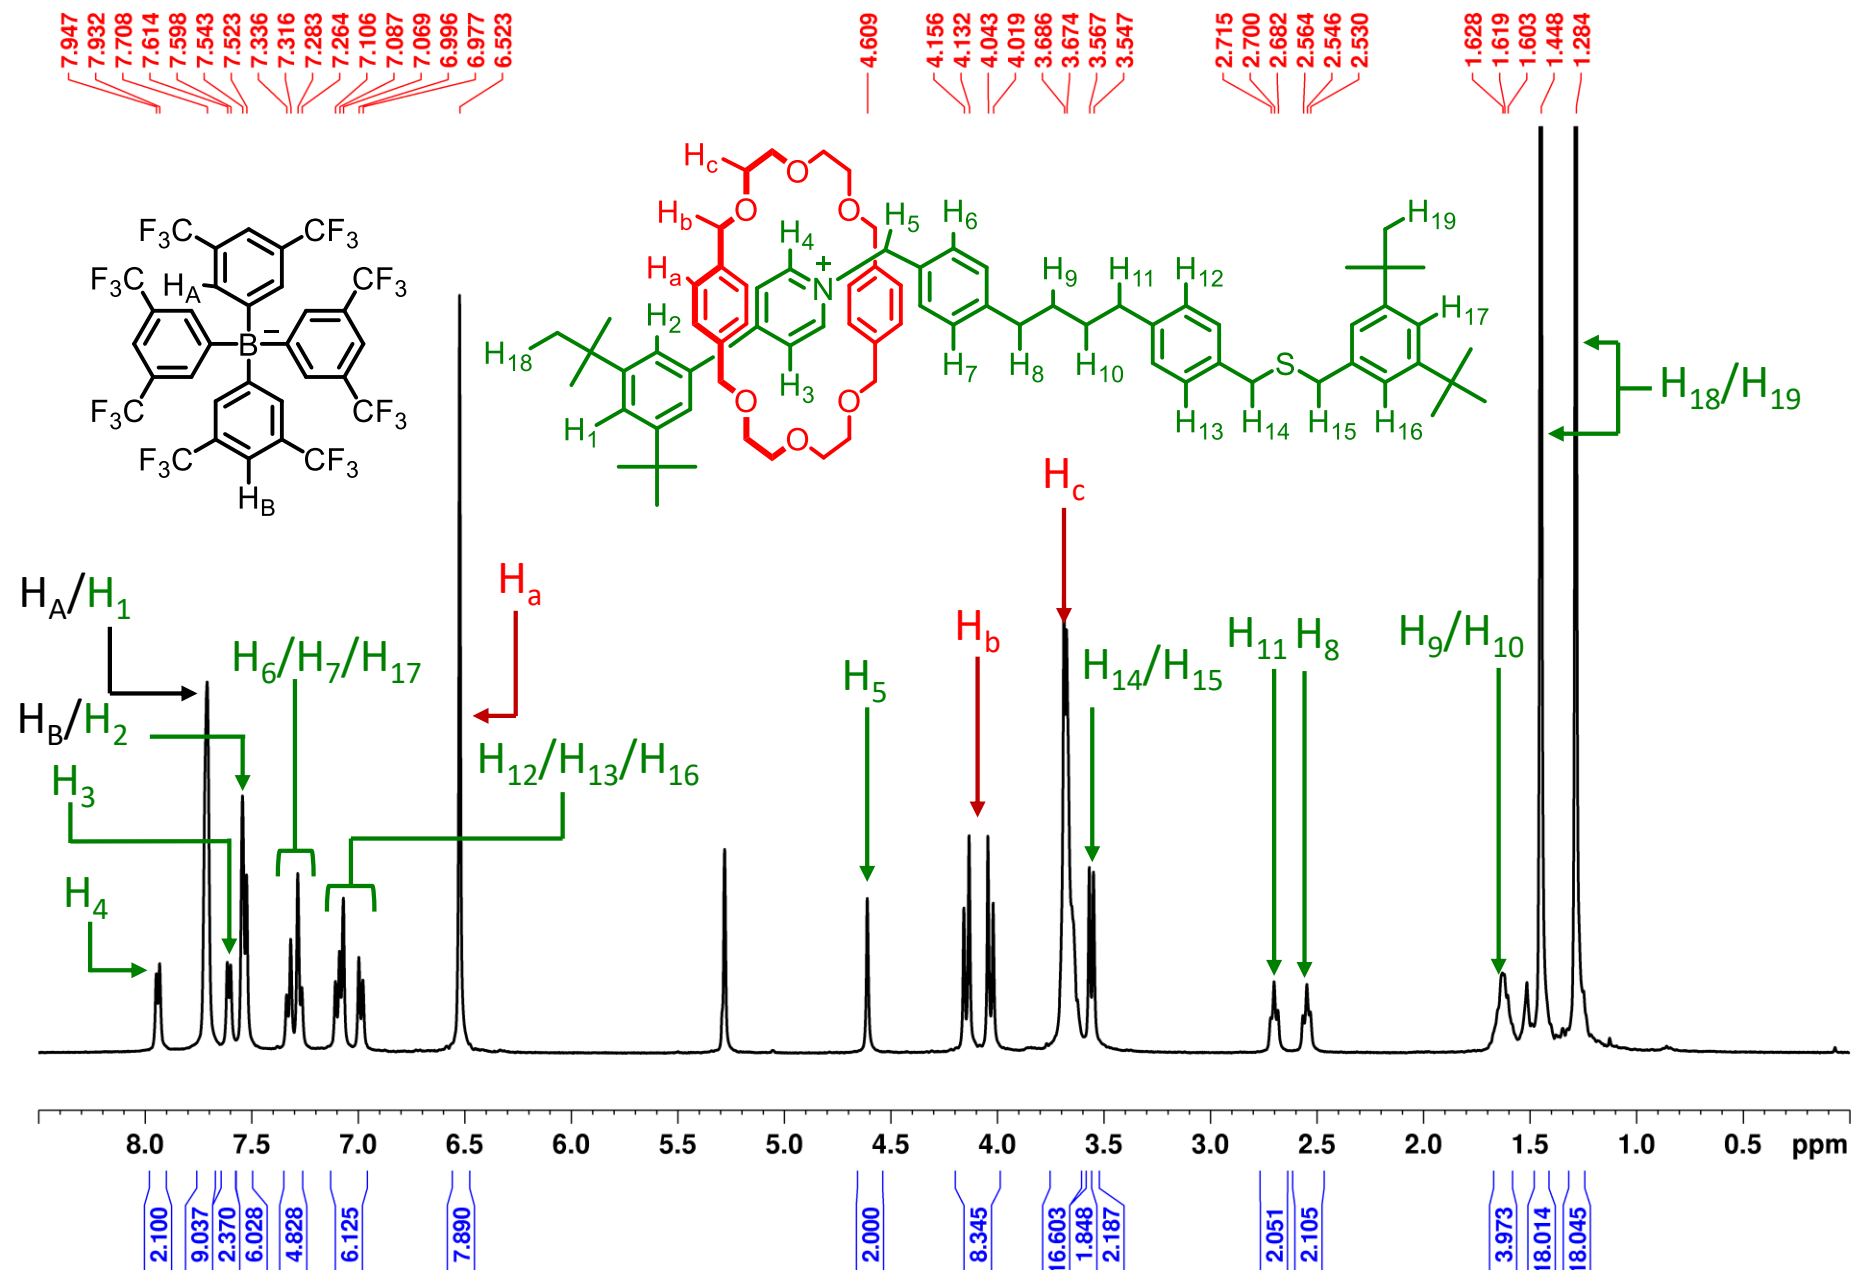

Figure S14  $^{13}\text{C}$  NMR Spectrum (100 MHz /  $\text{CDCl}_3$  / 298 K) of  $6 \cdot \text{TFPB}$

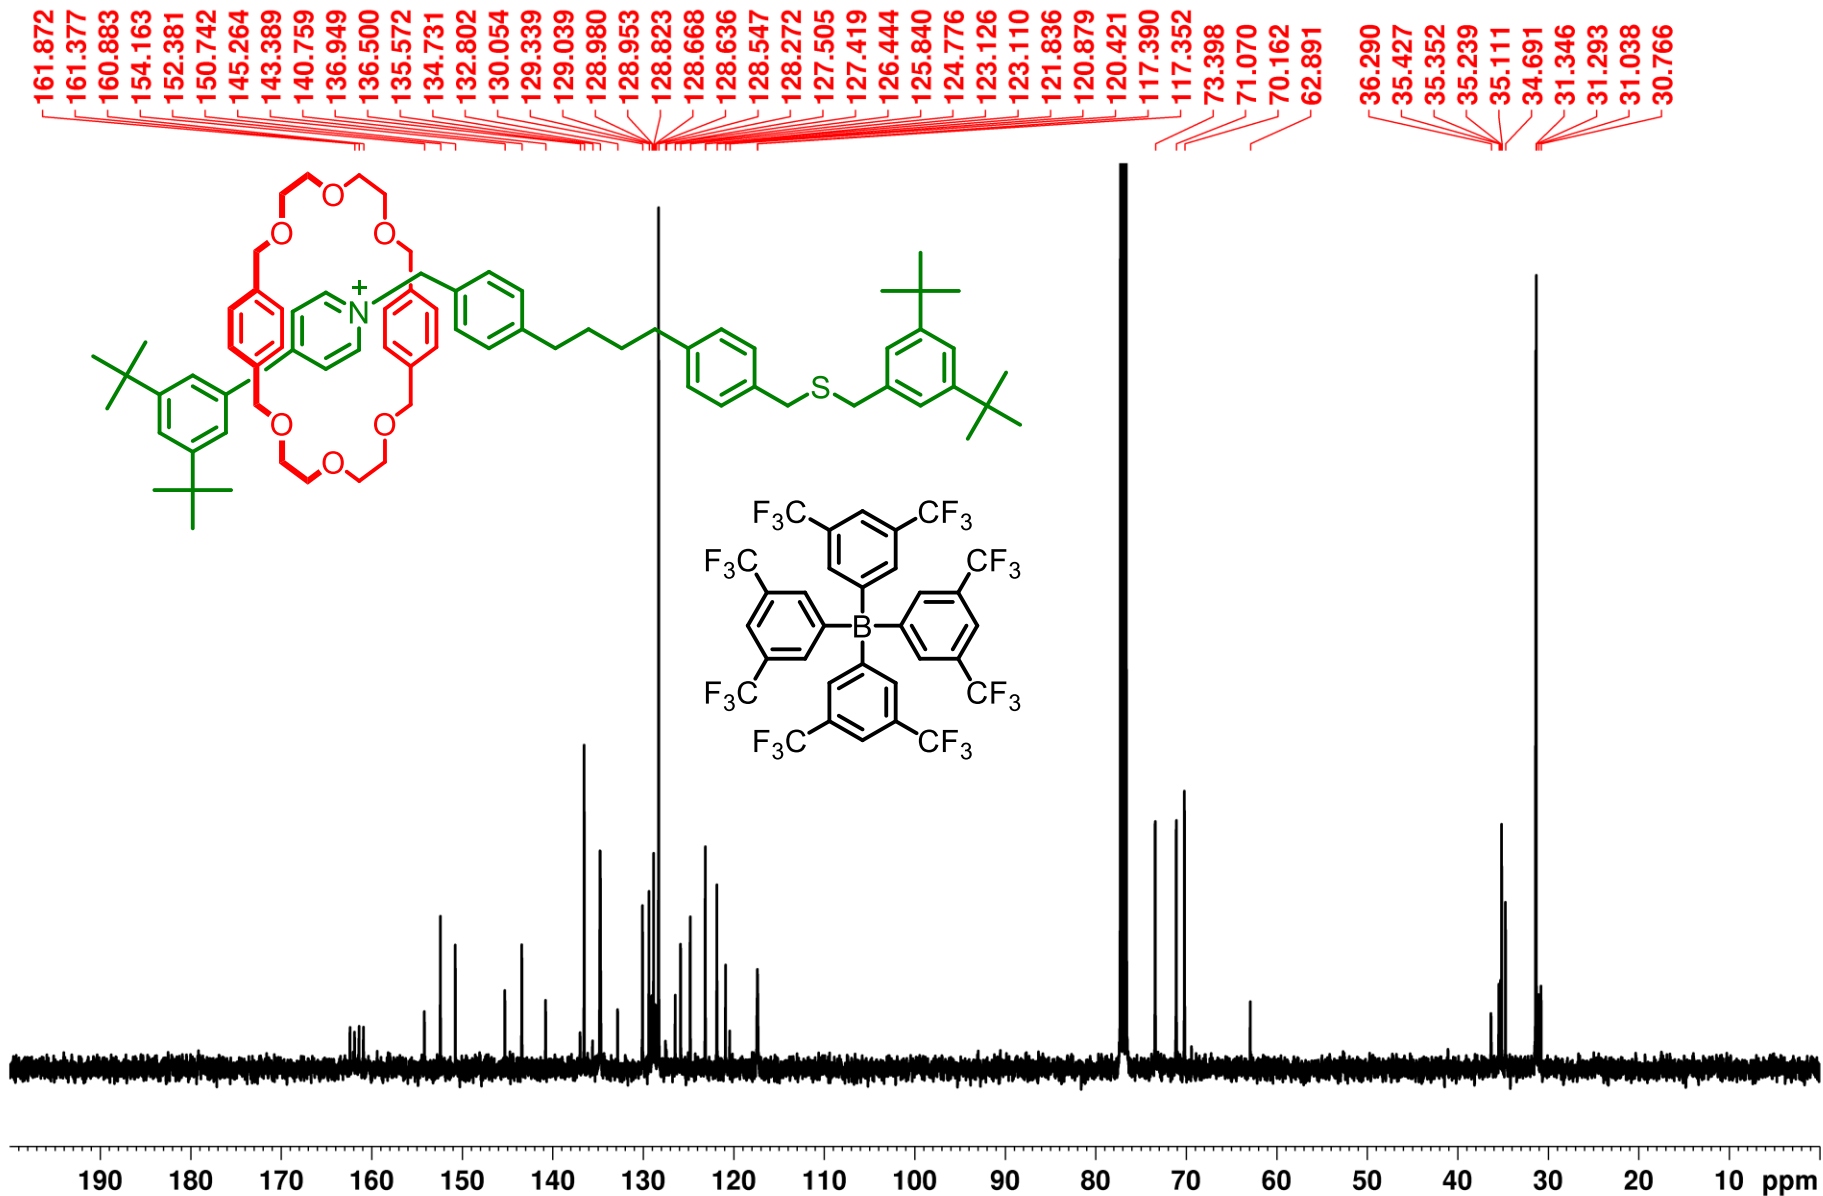

# Figure S15 ESI Mass Spectra of Compound 6•TFPB

## Mass Spectrum SmartFormula Report

### Analysis Info

Analysis Name: D:\Data\fish\data\2023q2(datas)\230529\230529\_pyridine-rot-C4-thio\_pw\_1-74\_01\_53571.d  
 Method: tune\_wide\_pos\_LCMS\_with lock mass\_220107-3.m  
 Sample Name: 230529\_pyridine-rot-C4-thio\_pw  
 Comment:  
 Acquisition Date: 5/29/2023 10:16:56 AM  
 Operator: Bruker microTOF-Q II  
 Instrument / Ser#: micrOTOF-Q 228888.10 183

### Acquisition Parameter

|             |          |                       |           |                  |           |
|-------------|----------|-----------------------|-----------|------------------|-----------|
| Source Type | ESI      | Ion Polarity          | Positive  | Set Nebulizer    | 2.0 Bar   |
| Focus       | Active   | Set Capillary         | 4500 V    | Set Dry Heater   | 180 °C    |
| Scan Begin  | 50 m/z   | Set End Plate Offset  | -500 V    | Set Dry Gas      | 6.9 l/min |
| Scan End    | 3000 m/z | Set Collision Cell RF | 500.0 Vpp | Set Divert Valve | Waste     |

### +MS, 0.2-0.2min #10-12

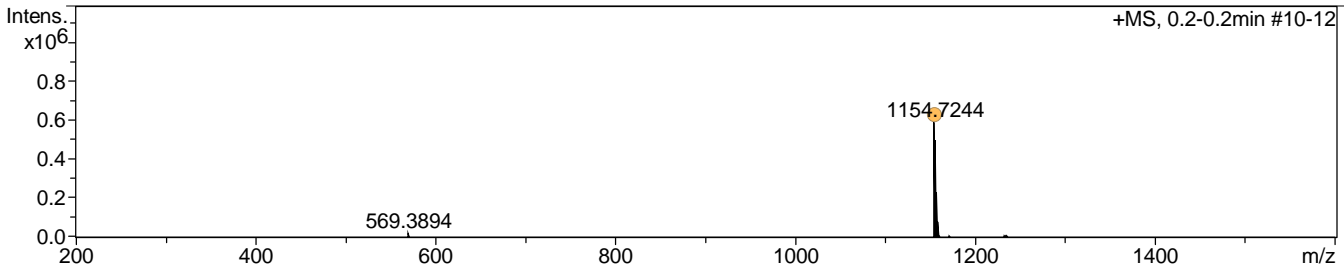

| Meas. m/z | # | Ion Formula | m/z       | err [mDa] | err [ppm] | mSigma | Score  | rdb  | e <sup>-</sup> Conf | N-Rule |
|-----------|---|-------------|-----------|-----------|-----------|--------|--------|------|---------------------|--------|
| 1154.7244 | 1 | C76H100NO6S | 1154.7266 | 2.2       | 1.9       | 6.9    | 100.00 | 27.5 | even                | ok     |

### +MS, 0.2-0.2min #10-12

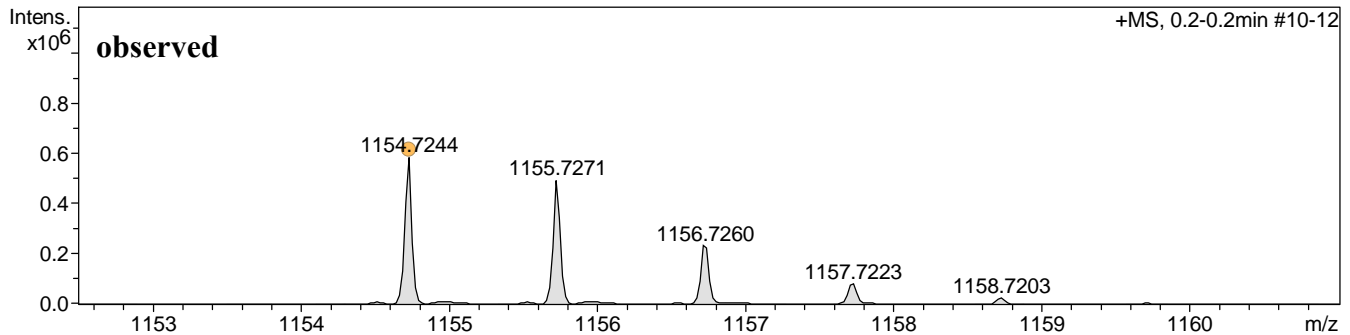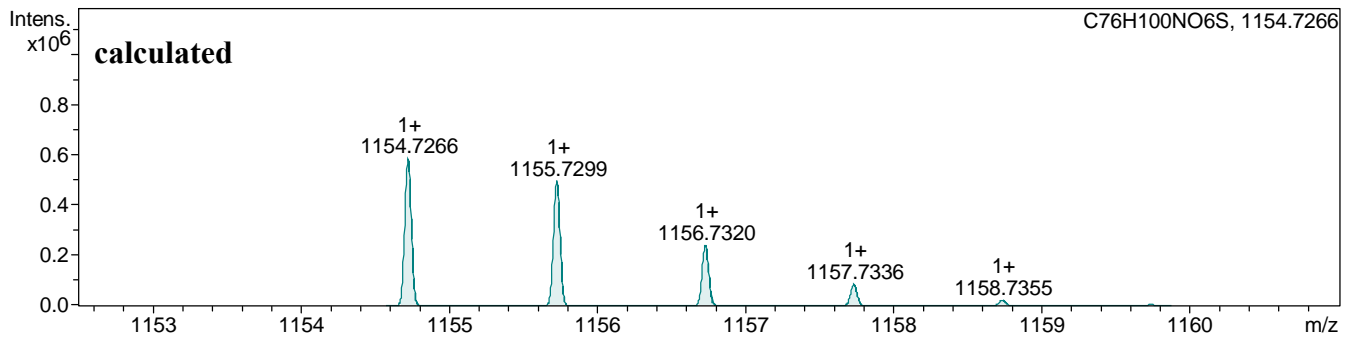

Figure S16  $^1\text{H}$  NMR Spectrum (400 MHz /  $\text{CD}_2\text{Cl}_2$  / 298 K) of  $7 \cdot \text{TFPB}$

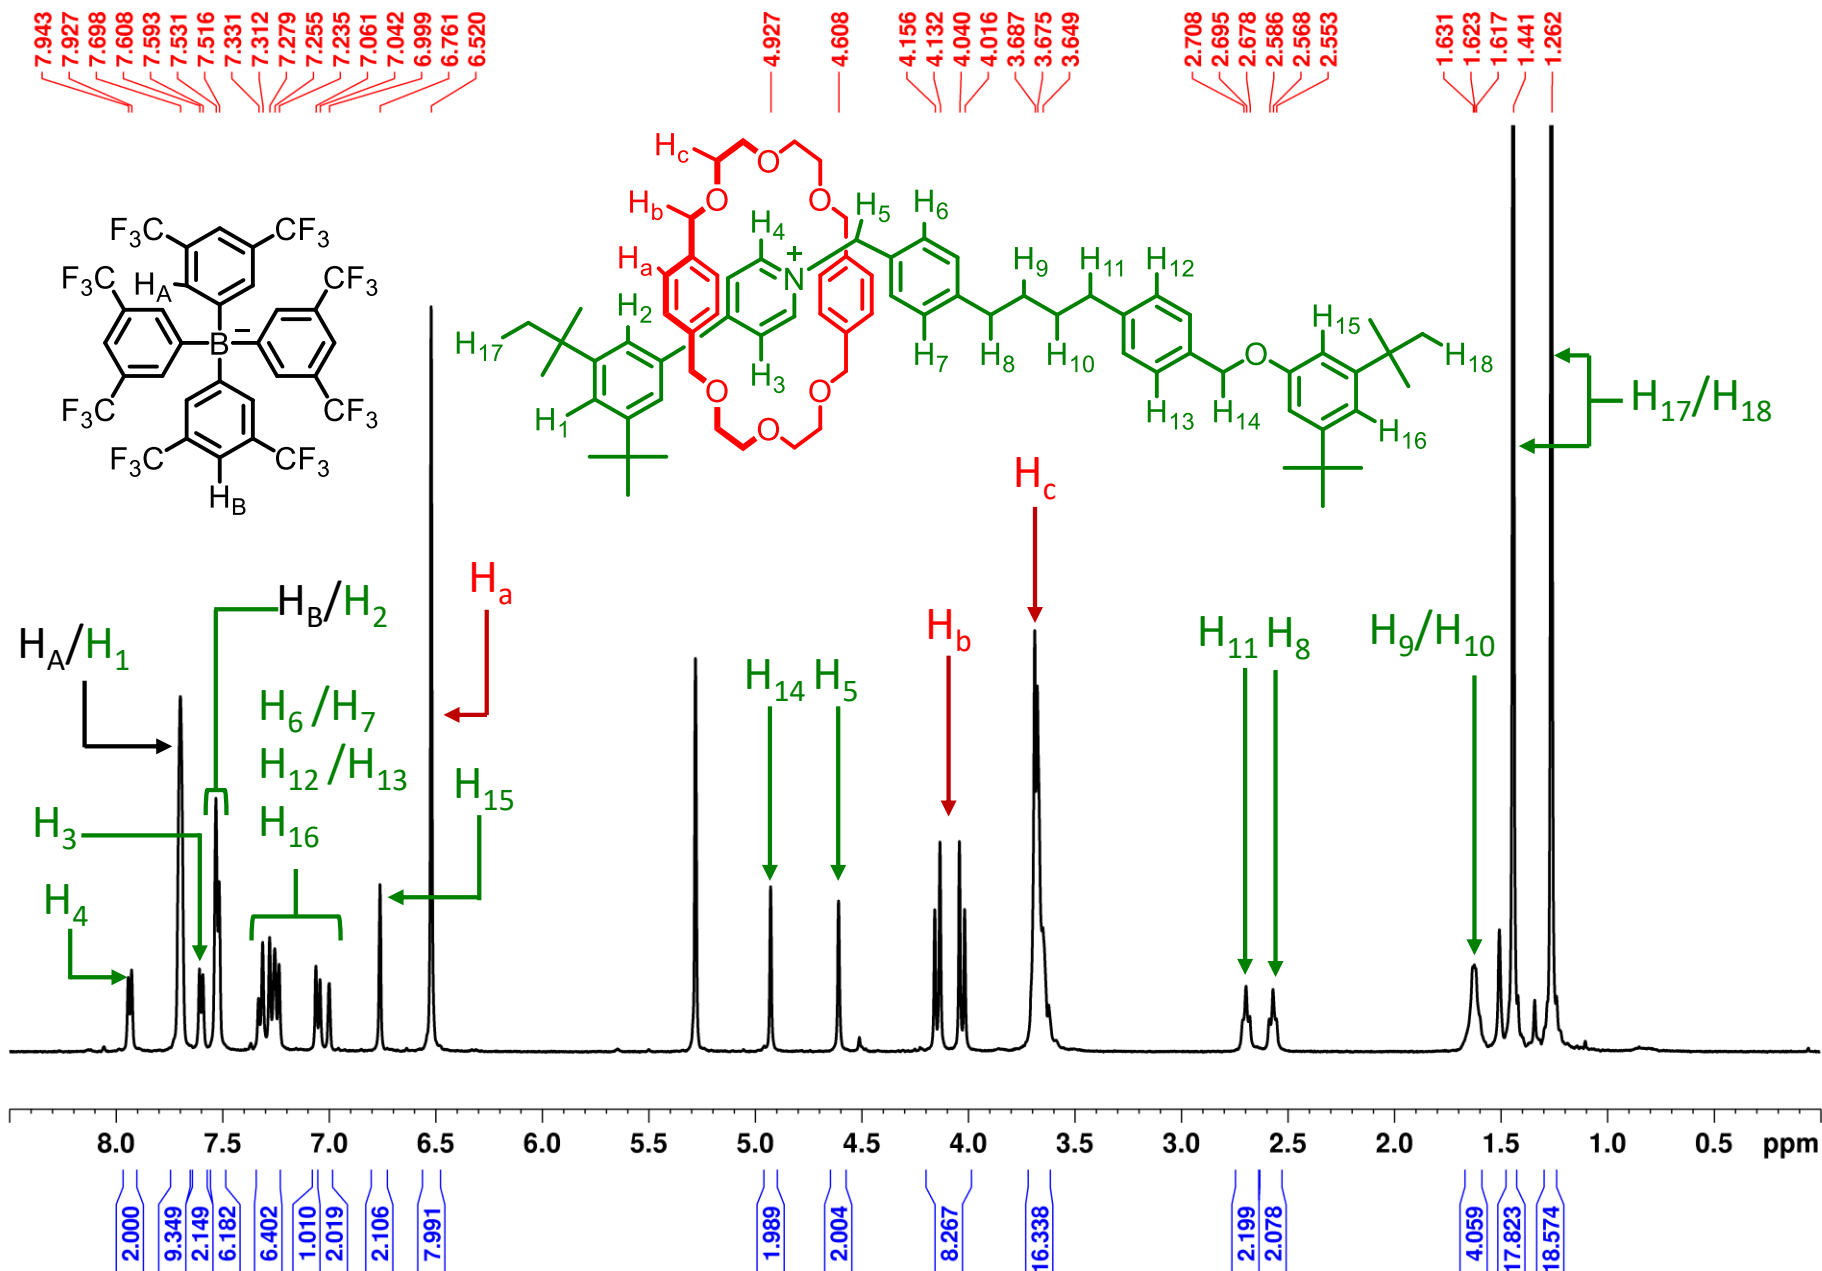

Figure S17  $^{13}\text{C}$  NMR Spectrum (100 MHz /  $\text{CDCl}_3$  / 298 K) of 7·TFPB

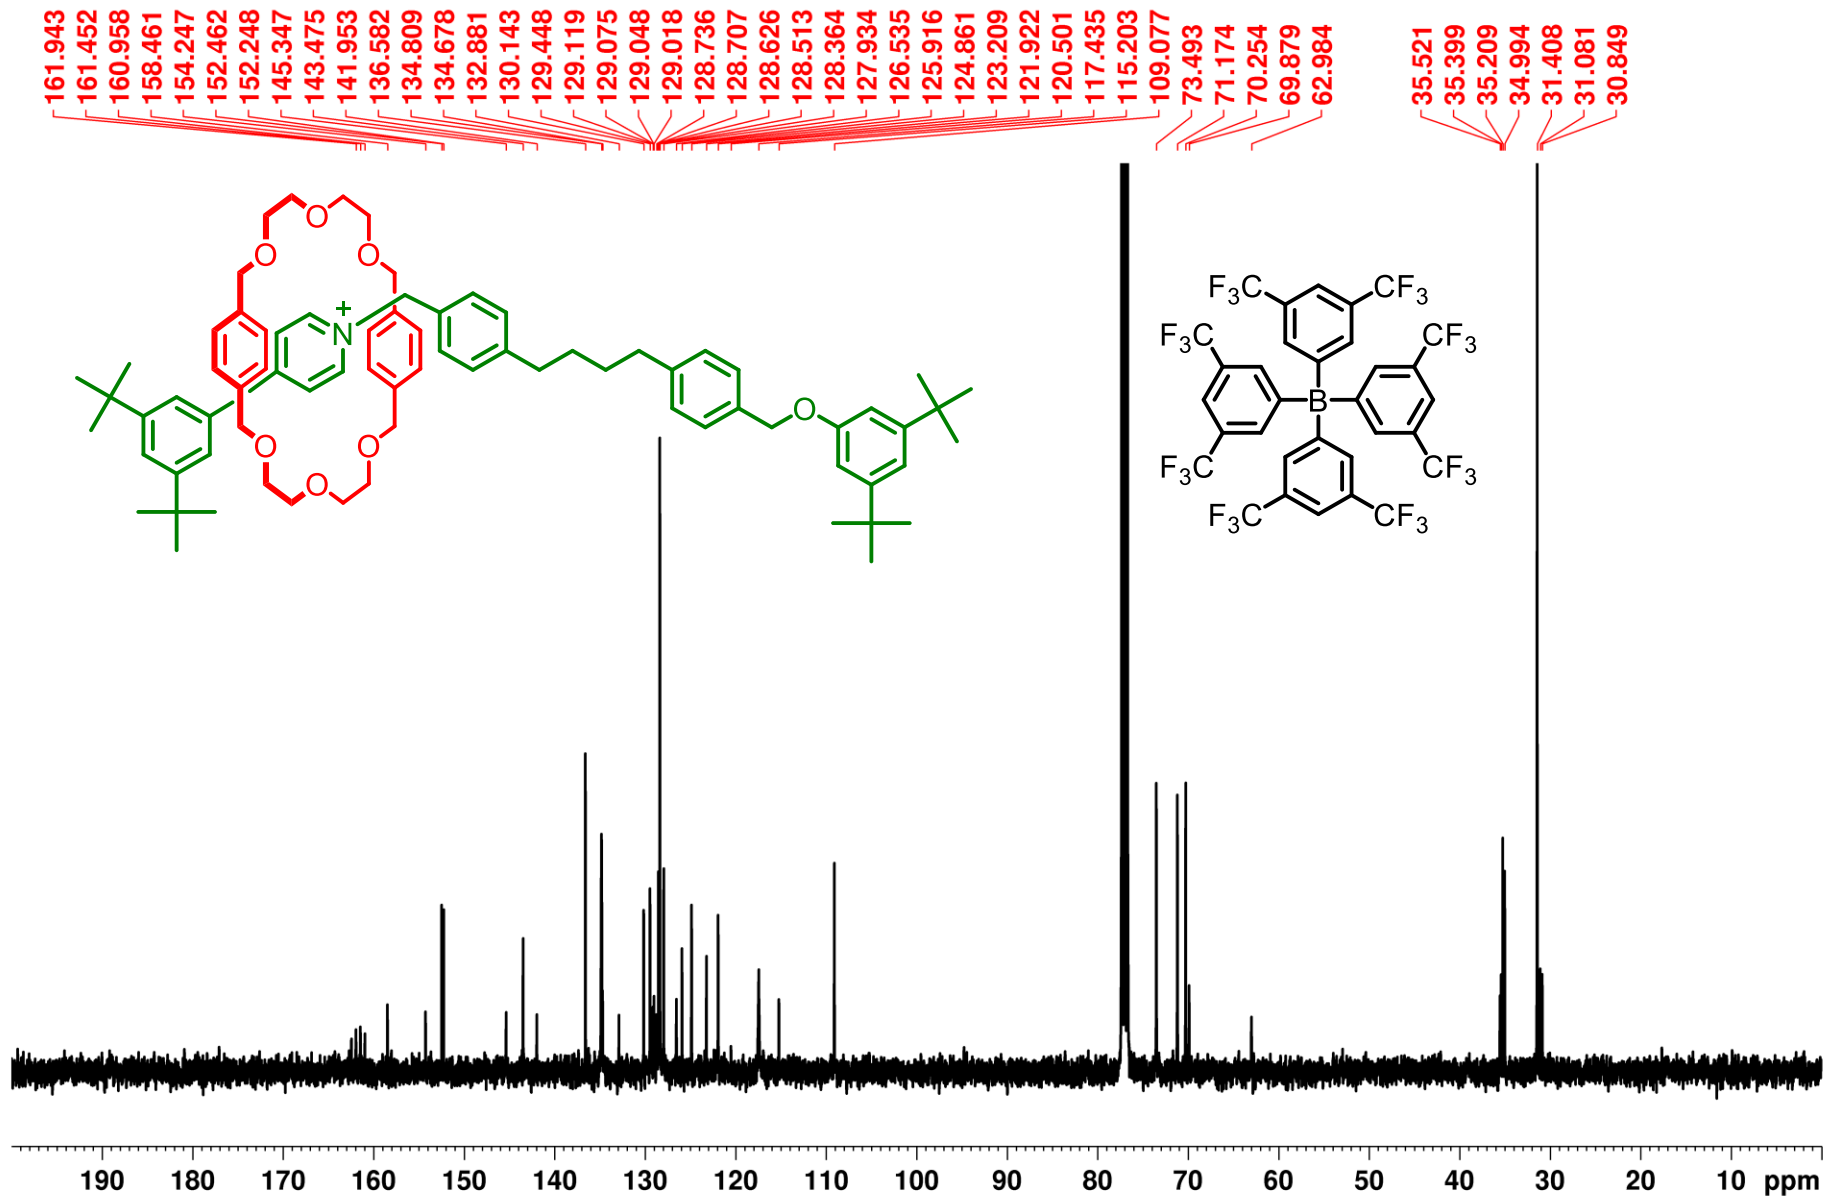



# Figure S18 ESI Mass Spectra of Compound 7•TFPB

## Mass Spectrum SmartFormula Report

### Analysis Info

Analysis Name D:\Data\fish\data\2023q2(datas)\230529\230529\_pyridine-rot-C4-phen\_pw\_1-73\_01\_53569.d  
Method tune\_wide\_pos\_LCMS\_with lock mass\_220107-3.m  
Sample Name 230529\_pyridine-rot-C4-phen\_pw  
Comment

Acquisition Date 5/29/2023 10:05:29 AM  
Operator Bruker microTOF-Q II  
Instrument / Ser# micrOTOF-Q 228888.10  
183

### Acquisition Parameter

|             |          |                       |           |                  |           |
|-------------|----------|-----------------------|-----------|------------------|-----------|
| Source Type | ESI      | Ion Polarity          | Positive  | Set Nebulizer    | 2.0 Bar   |
| Focus       | Active   | Set Capillary         | 4500 V    | Set Dry Heater   | 180 °C    |
| Scan Begin  | 50 m/z   | Set End Plate Offset  | -500 V    | Set Dry Gas      | 6.9 l/min |
| Scan End    | 3000 m/z | Set Collision Cell RF | 500.0 Vpp | Set Divert Valve | Waste     |

### +MS, 0.2min #9

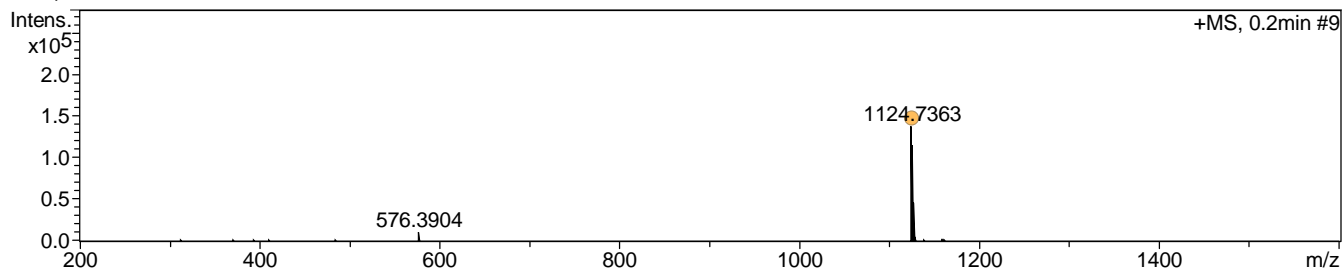

| Meas. m/z | # | Ion Formula | m/z       | err [mDa] | err [ppm] | mSigma | Score  | rdb  | e <sup>-</sup> | Conf | N-Rule |
|-----------|---|-------------|-----------|-----------|-----------|--------|--------|------|----------------|------|--------|
| 1124.7363 | 1 | C75H98NO7   | 1124.7338 | -2.5      | -2.2      | 11.2   | 100.00 | 27.5 | even           |      | ok     |

### +MS, 0.2min #9

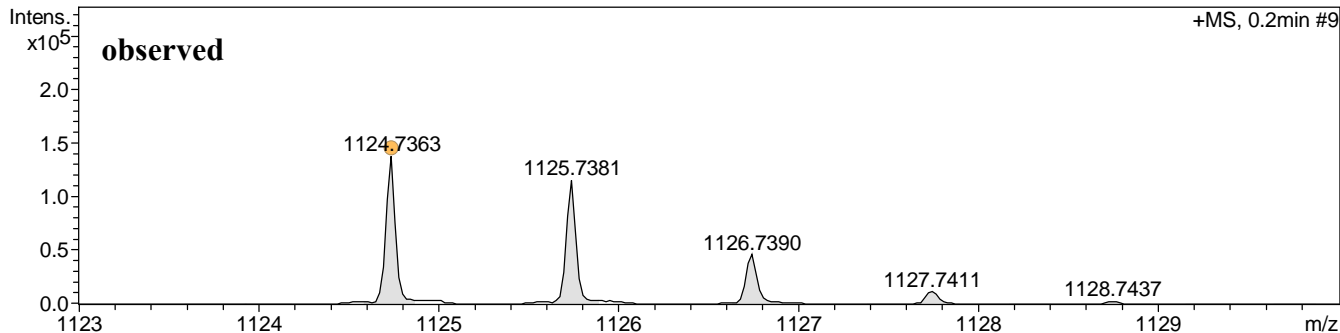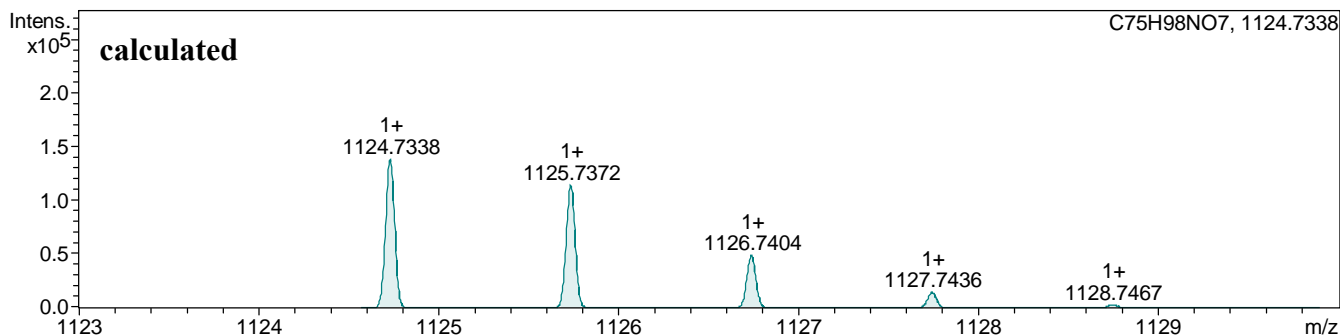

Figure S19  $^1\text{H}$  NMR Spectrum (400 MHz /  $\text{CD}_2\text{Cl}_2$  / 298 K) of  $\mathbf{8} \cdot \text{TFPB}$

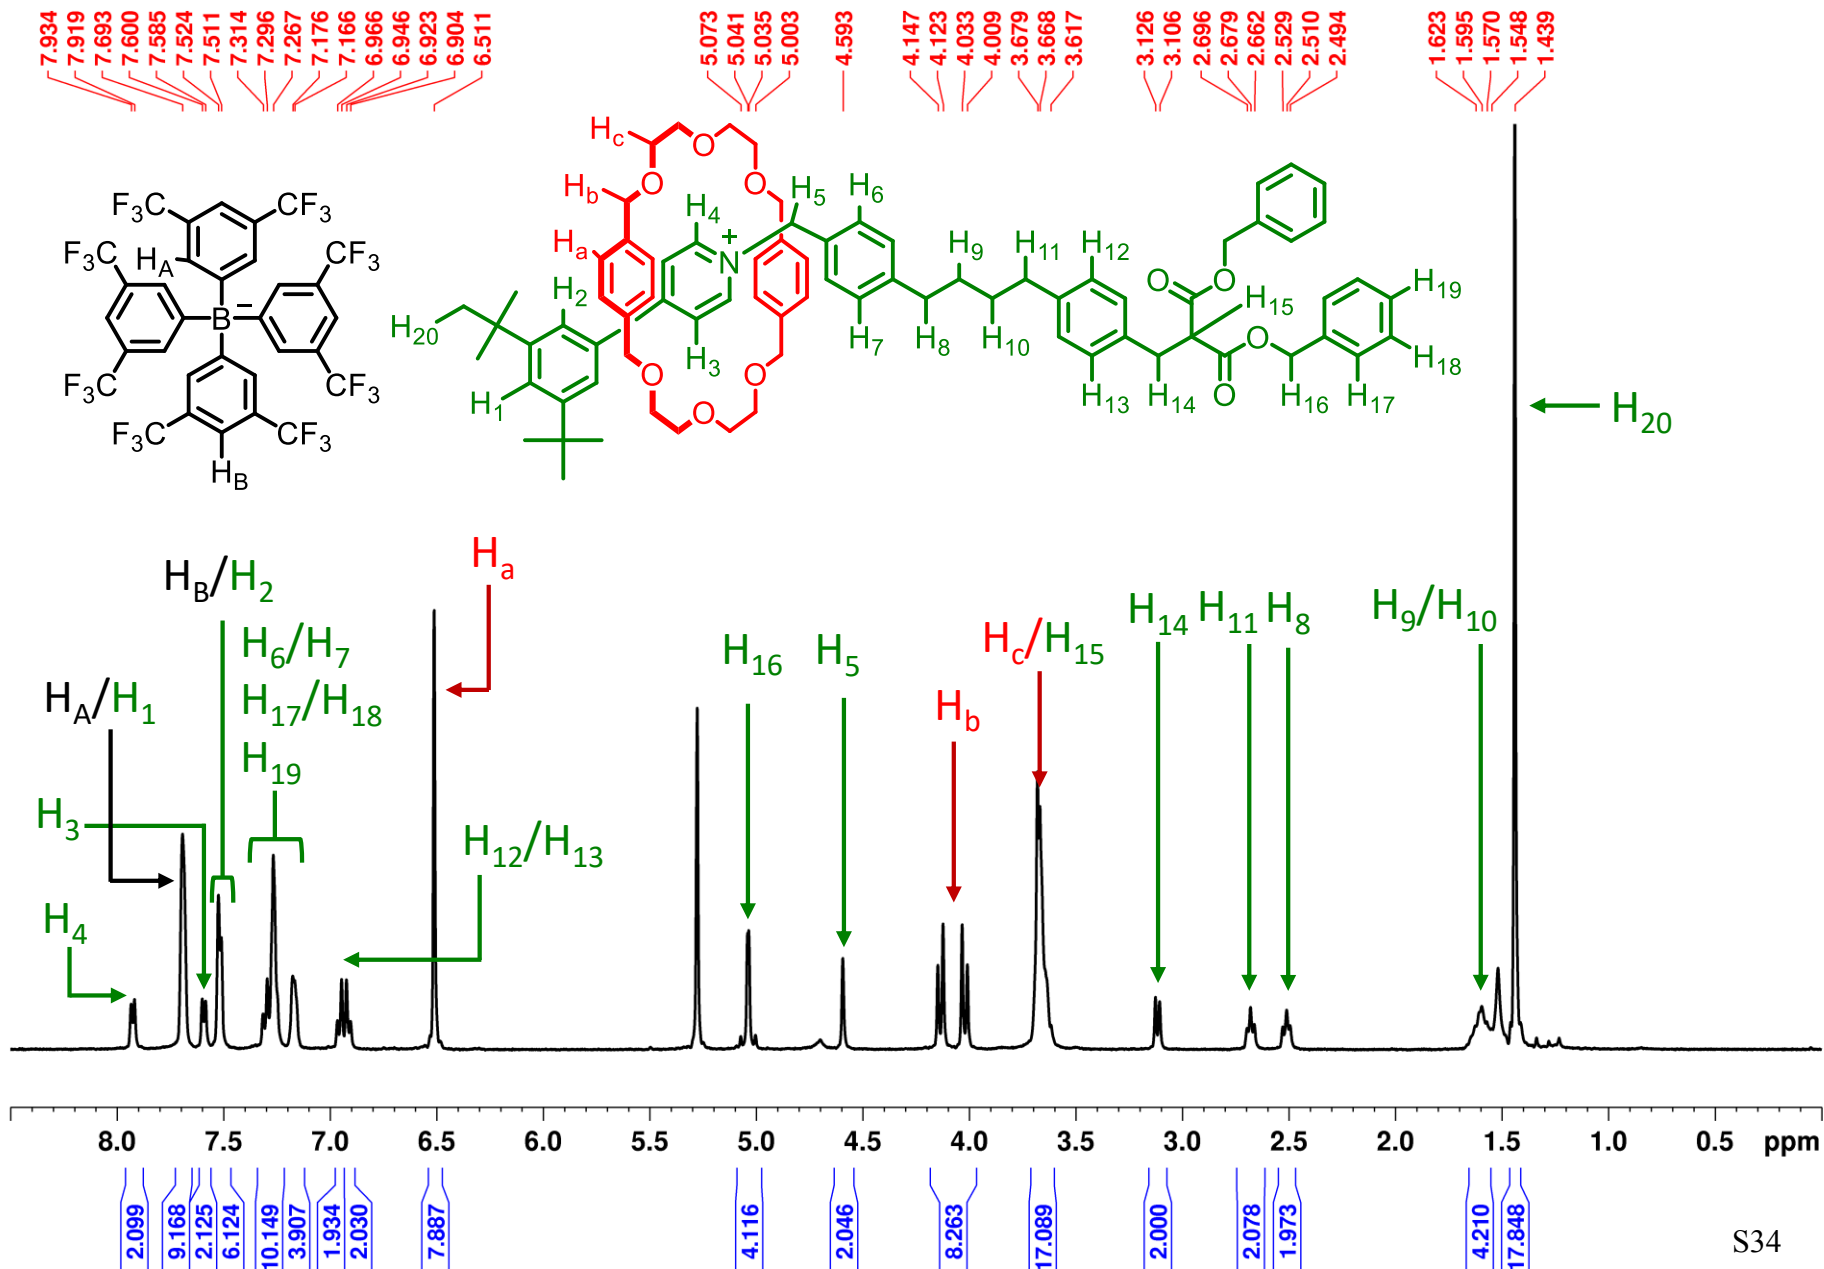

Figure S20  $^{13}\text{C}$  NMR Spectrum (100 MHz /  $\text{CDCl}_3$  / 298 K) of  $\mathbf{8} \cdot \text{TFPB}$

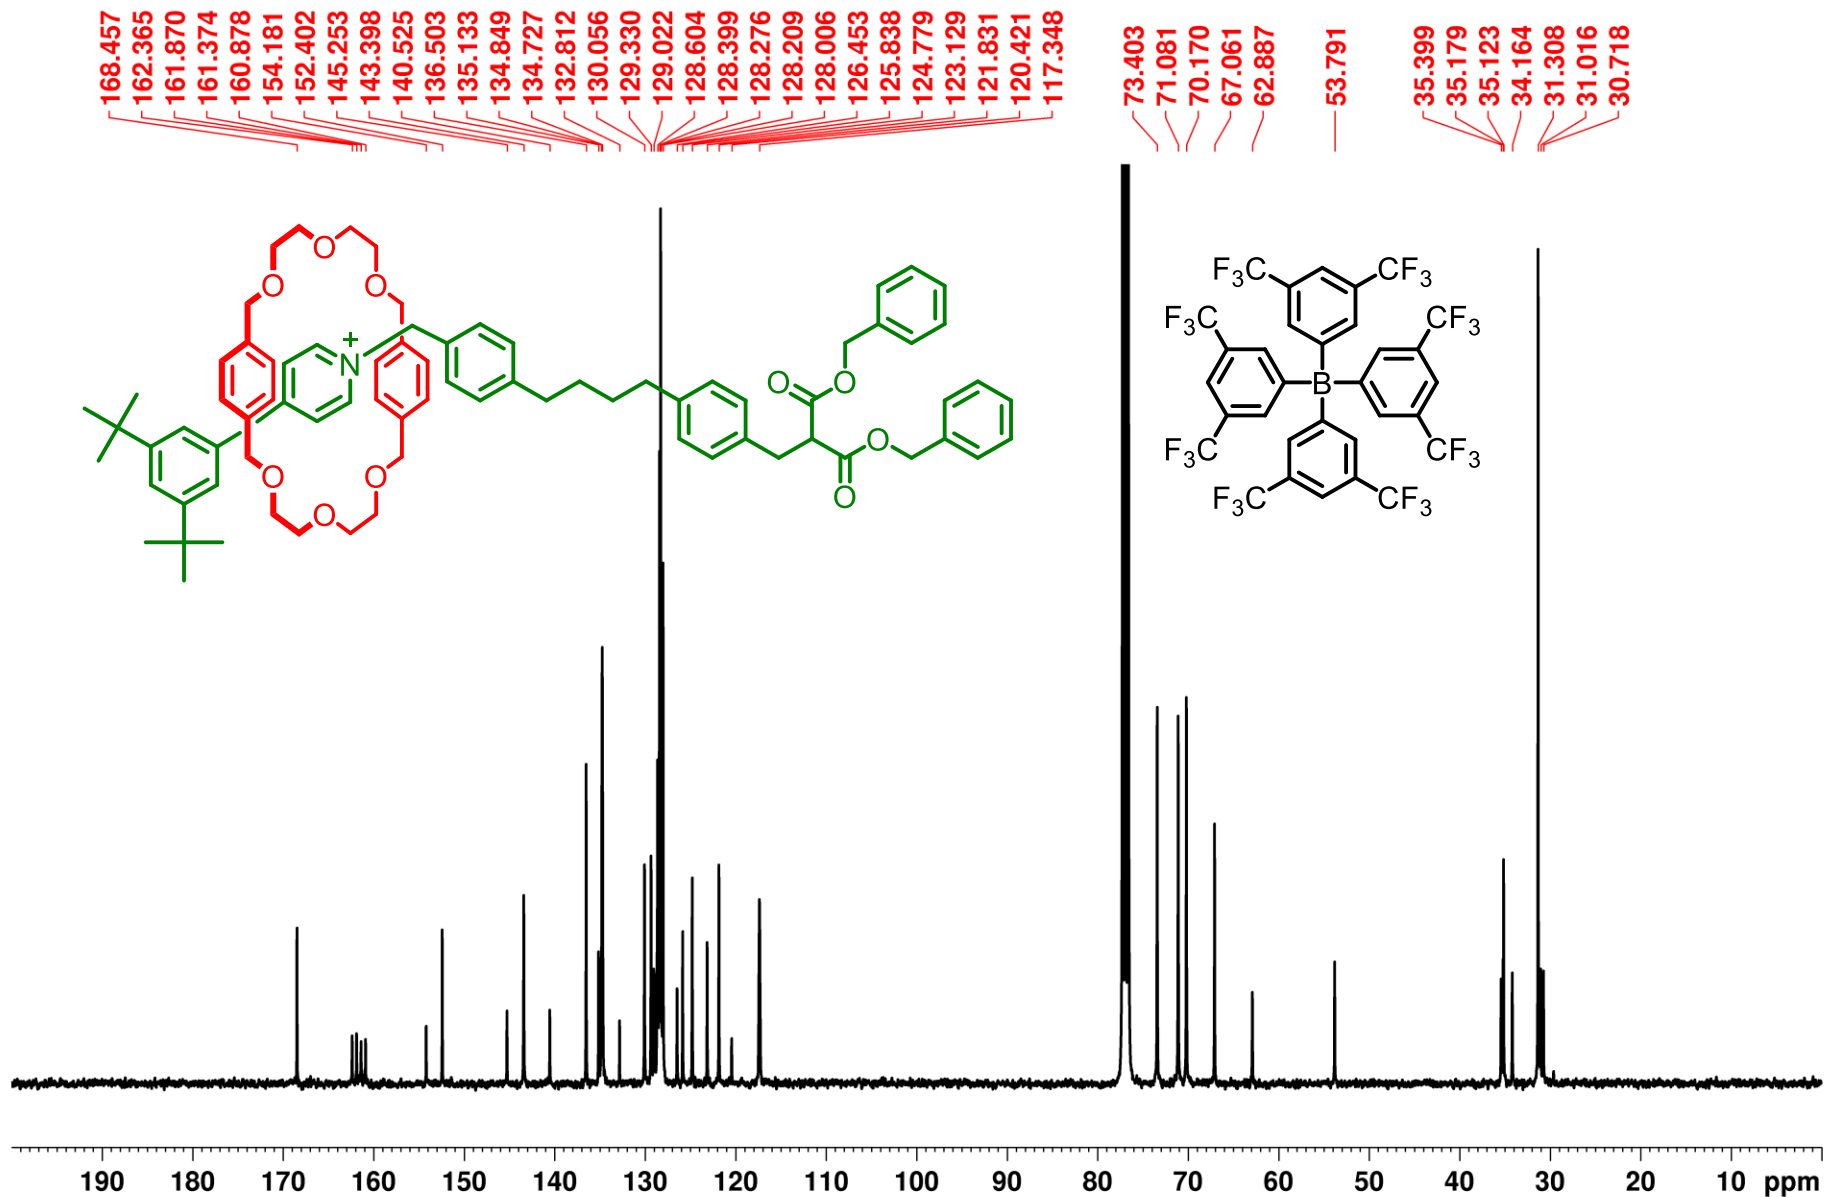

# Figure S21 ESI Mass Spectra of Compound 8•TFPB

## Mass Spectrum SmartFormula Report

### Analysis Info

Analysis Name D:\Data\fish\data\2023q2(datas)\230605\230605\_pyridinum-malonate-2\_pw\_1-1\_01\_53700.d  
Method tune\_wide\_pos\_LCMS\_with lock mass\_220107-3.m  
Sample Name 230605\_pyridinum-malonate-2\_pw  
Comment

Acquisition Date 6/5/2023 10:50:29 AM  
Operator Bruker microTOF-Q II  
Instrument / Ser# micrOTOF-Q 228888.10  
183

### Acquisition Parameter

|             |          |                       |           |                  |           |
|-------------|----------|-----------------------|-----------|------------------|-----------|
| Source Type | ESI      | Ion Polarity          | Positive  | Set Nebulizer    | 2.0 Bar   |
| Focus       | Active   | Set Capillary         | 4500 V    | Set Dry Heater   | 180 °C    |
| Scan Begin  | 50 m/z   | Set End Plate Offset  | -500 V    | Set Dry Gas      | 6.9 l/min |
| Scan End    | 3000 m/z | Set Collision Cell RF | 500.0 Vpp | Set Divert Valve | Waste     |

### +MS, 0.2-0.2min #9-11

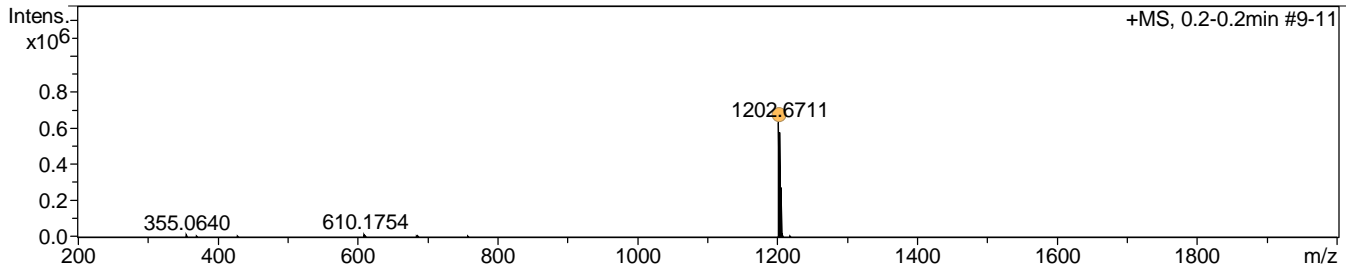

| Meas. m/z | # | Ion Formula | m/z       | err [mDa] | err [ppm] | mSigma | Score  | rdb  | e <sup>-</sup> Conf | N-Rule |
|-----------|---|-------------|-----------|-----------|-----------|--------|--------|------|---------------------|--------|
| 1202.6711 | 1 | C78H92NO10  | 1202.6716 | 0.5       | 0.4       | 29.5   | 100.00 | 33.5 | even                | ok     |

### +MS, 0.2-0.2min #9-11

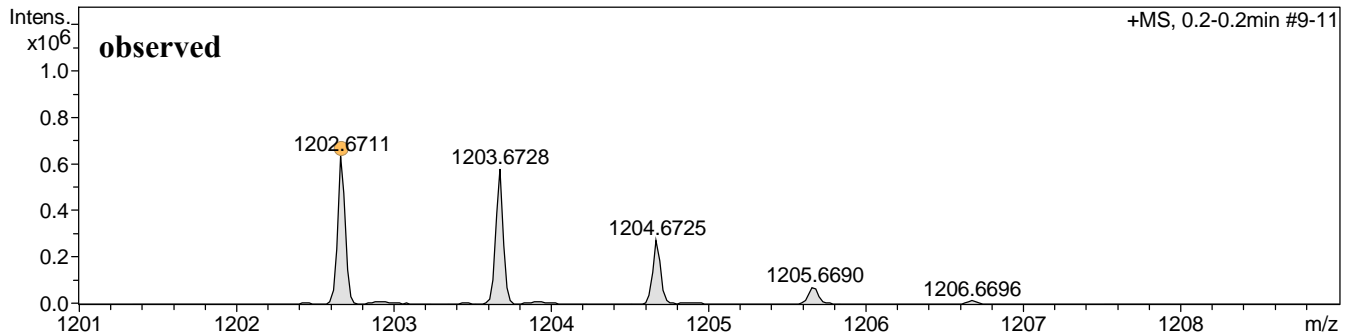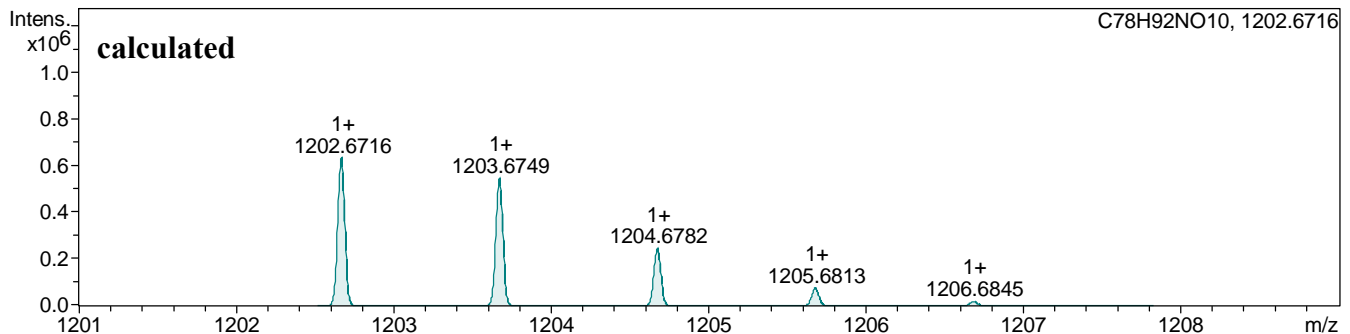

Figure S22  $^1\text{H}$  NMR Spectrum (400 MHz /  $\text{CD}_2\text{Cl}_2$  / 298 K) of **S1**·TFPB

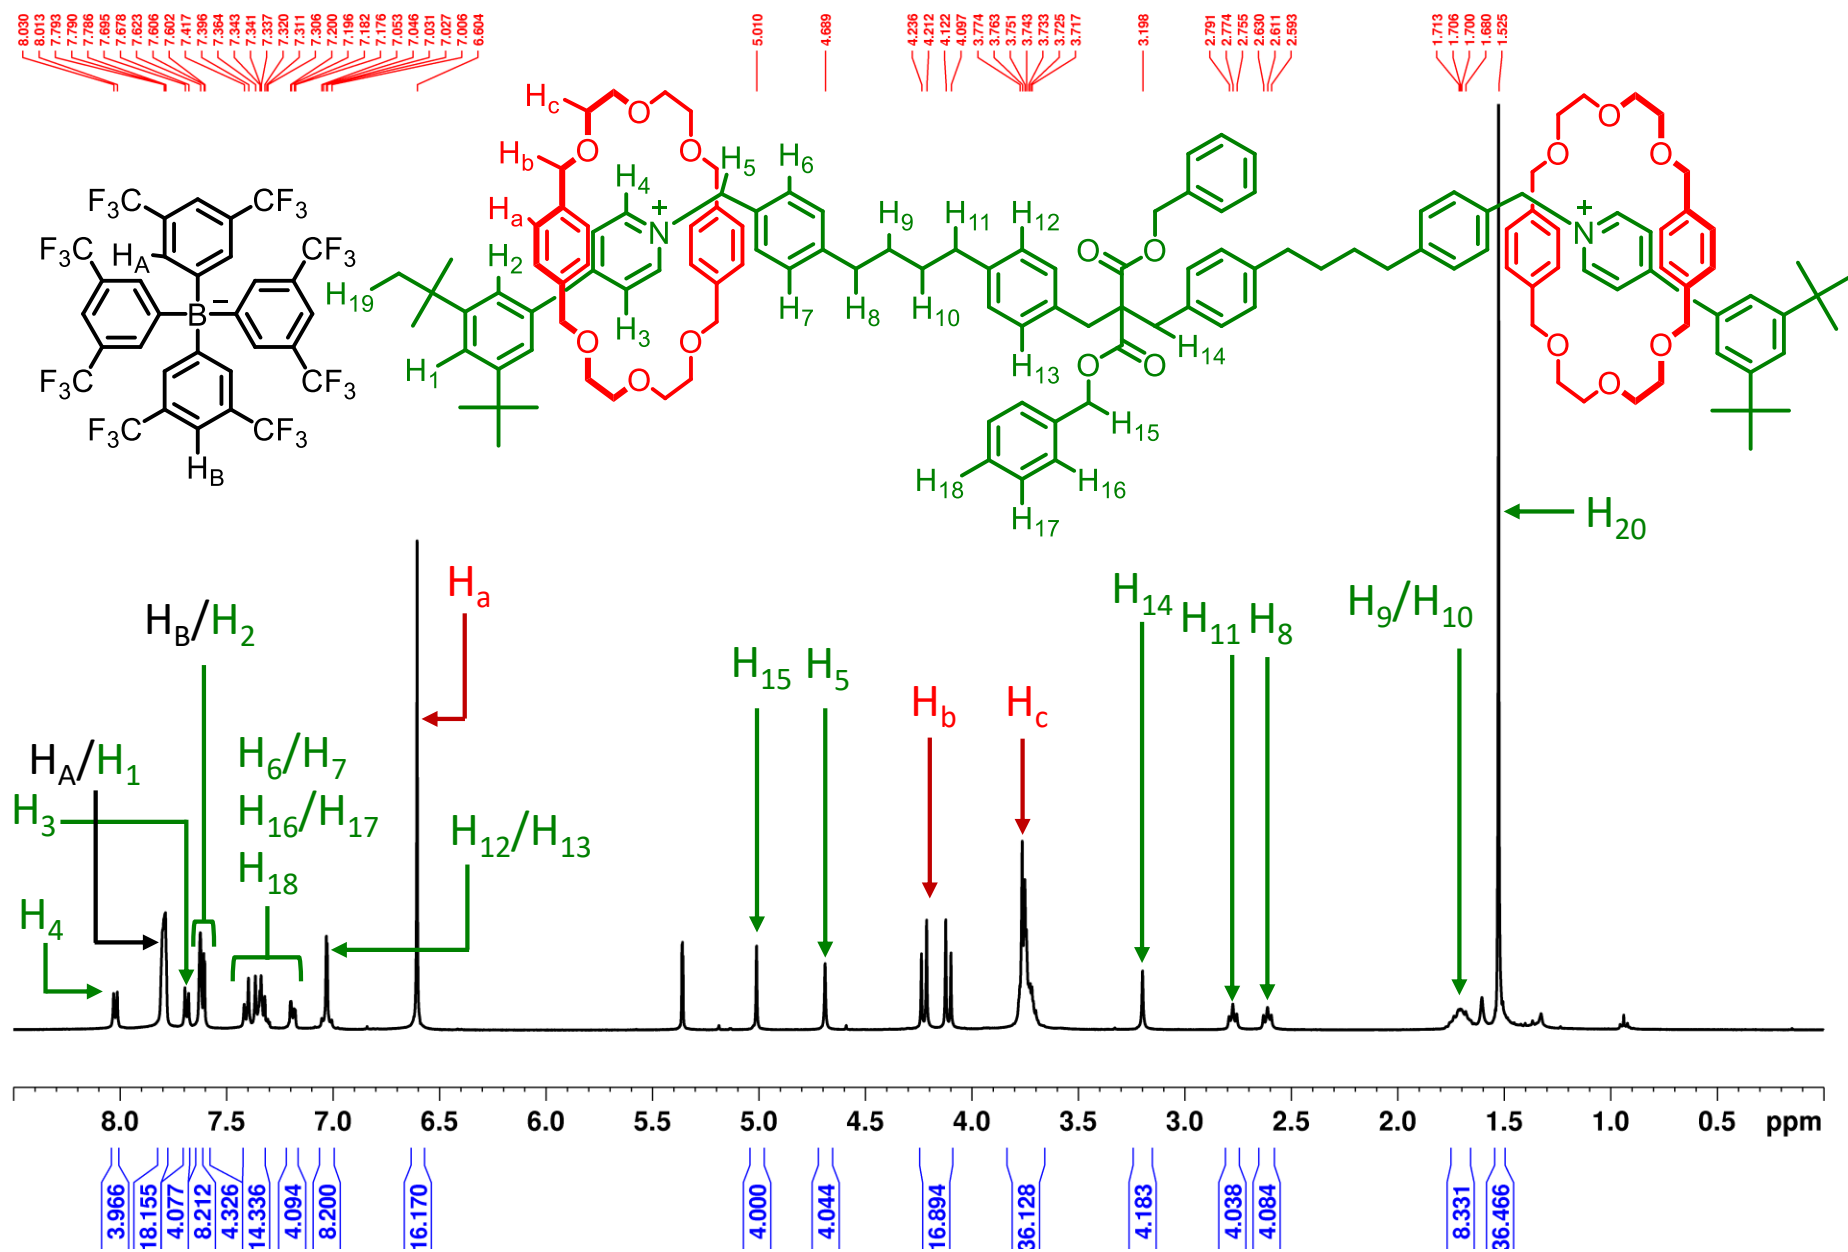

Figure S23  $^{13}\text{C}$  NMR Spectrum (100 MHz /  $\text{CDCl}_3$  / 298 K) of  $\text{S1} \cdot \text{TFPB}$

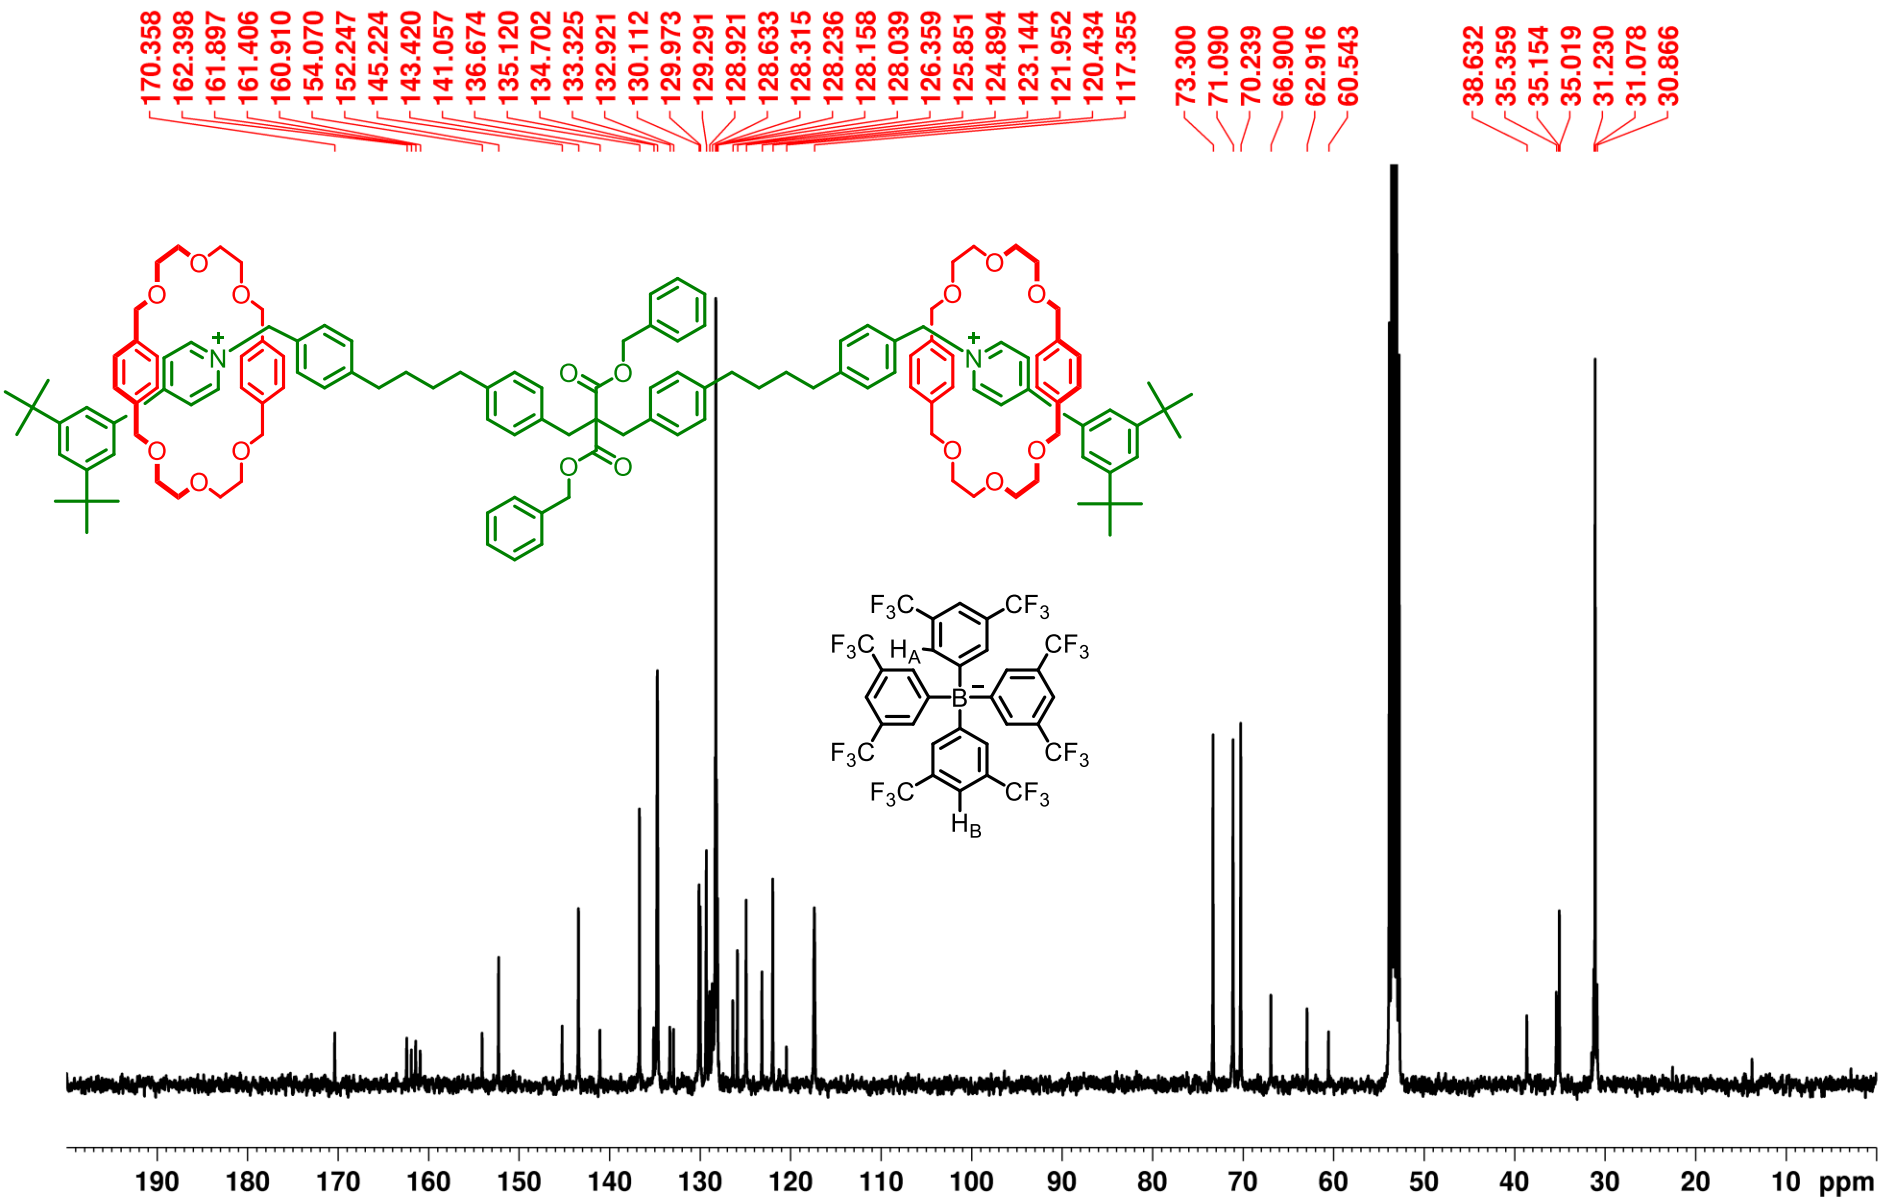

# Figure S24 ESI Mass Spectra of Compound S1•2TFPB

## Mass Spectrum SmartFormula Report

### Analysis Info

|               |                                                                                |                   |                      |
|---------------|--------------------------------------------------------------------------------|-------------------|----------------------|
| Analysis Name | D:\Data\Fish\1_Data\2024Q2\240430\240430_pyridine-C4-3-rot-ma_pw_46_01_35771.d | Acquisition Date  | 4/30/2024 3:39:26 PM |
| Method        | tune_wide_pos_LCMS_with lock mass_220107-3.m                                   | Operator          | BDAL@DE              |
| Sample Name   | 240430_pyridine-C4-3-rot-ma_pw                                                 | Instrument / Ser# | micrOTOF-Q 228888.10 |
| Comment       |                                                                                |                   | 183                  |

### Acquisition Parameter

|             |          |                       |           |                  |           |
|-------------|----------|-----------------------|-----------|------------------|-----------|
| Source Type | ESI      | Ion Polarity          | Positive  | Set Nebulizer    | 2.0 Bar   |
| Focus       | Active   | Set Capillary         | 4500 V    | Set Dry Heater   | 180 °C    |
| Scan Begin  | 50 m/z   | Set End Plate Offset  | -500 V    | Set Dry Gas      | 6.9 l/min |
| Scan End    | 3000 m/z | Set Collision Cell RF | 500.0 Vpp | Set Divert Valve | Waste     |

### +MS, 0.5-0.6min #29-36

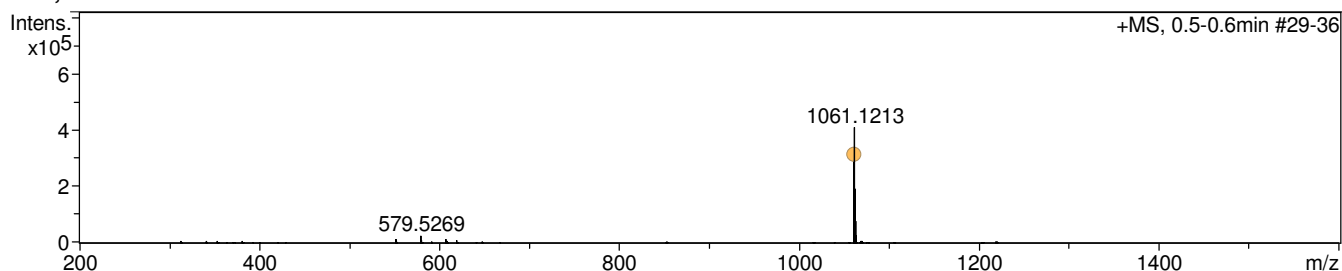

| Meas. m/z | # | Ion Formula   | m/z       | err [mDa] | err [ppm] | mSigma | Score  | rdb  | e <sup>-</sup> Conf | N-Rule |
|-----------|---|---------------|-----------|-----------|-----------|--------|--------|------|---------------------|--------|
| 1060.6187 | 1 | C139H168N2O16 | 1060.6191 | -0.5      | -0.5      | 33.6   | 100.00 | 57.0 | even                | ok     |

### +MS, 0.5-0.6min #29-36

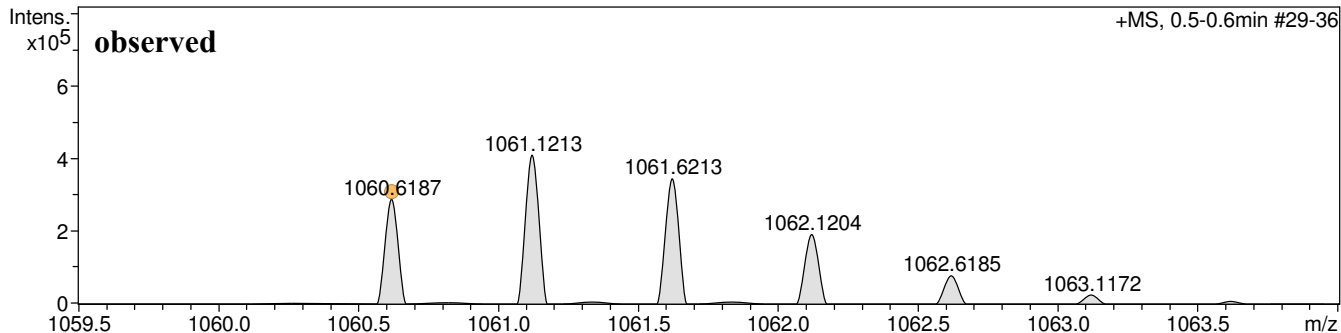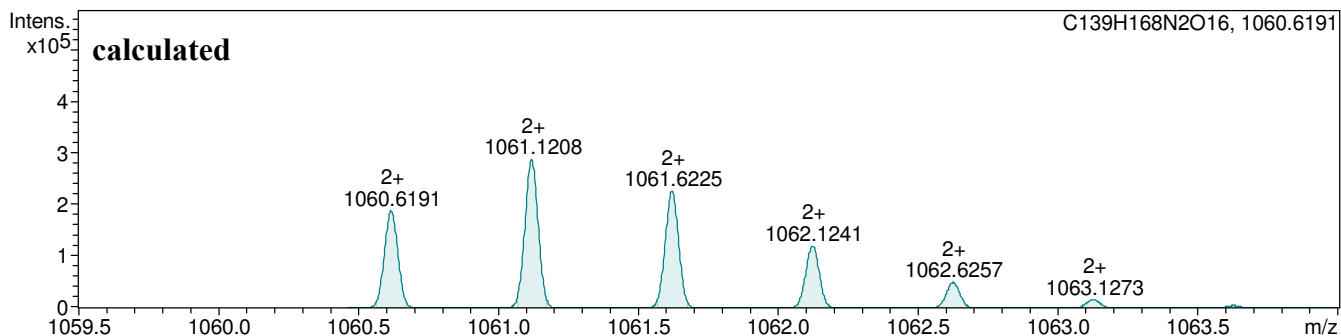

Figure S25  $^1\text{H}$  NMR Spectrum (400 MHz /  $\text{CDCl}_3$  / 298 K) of S2

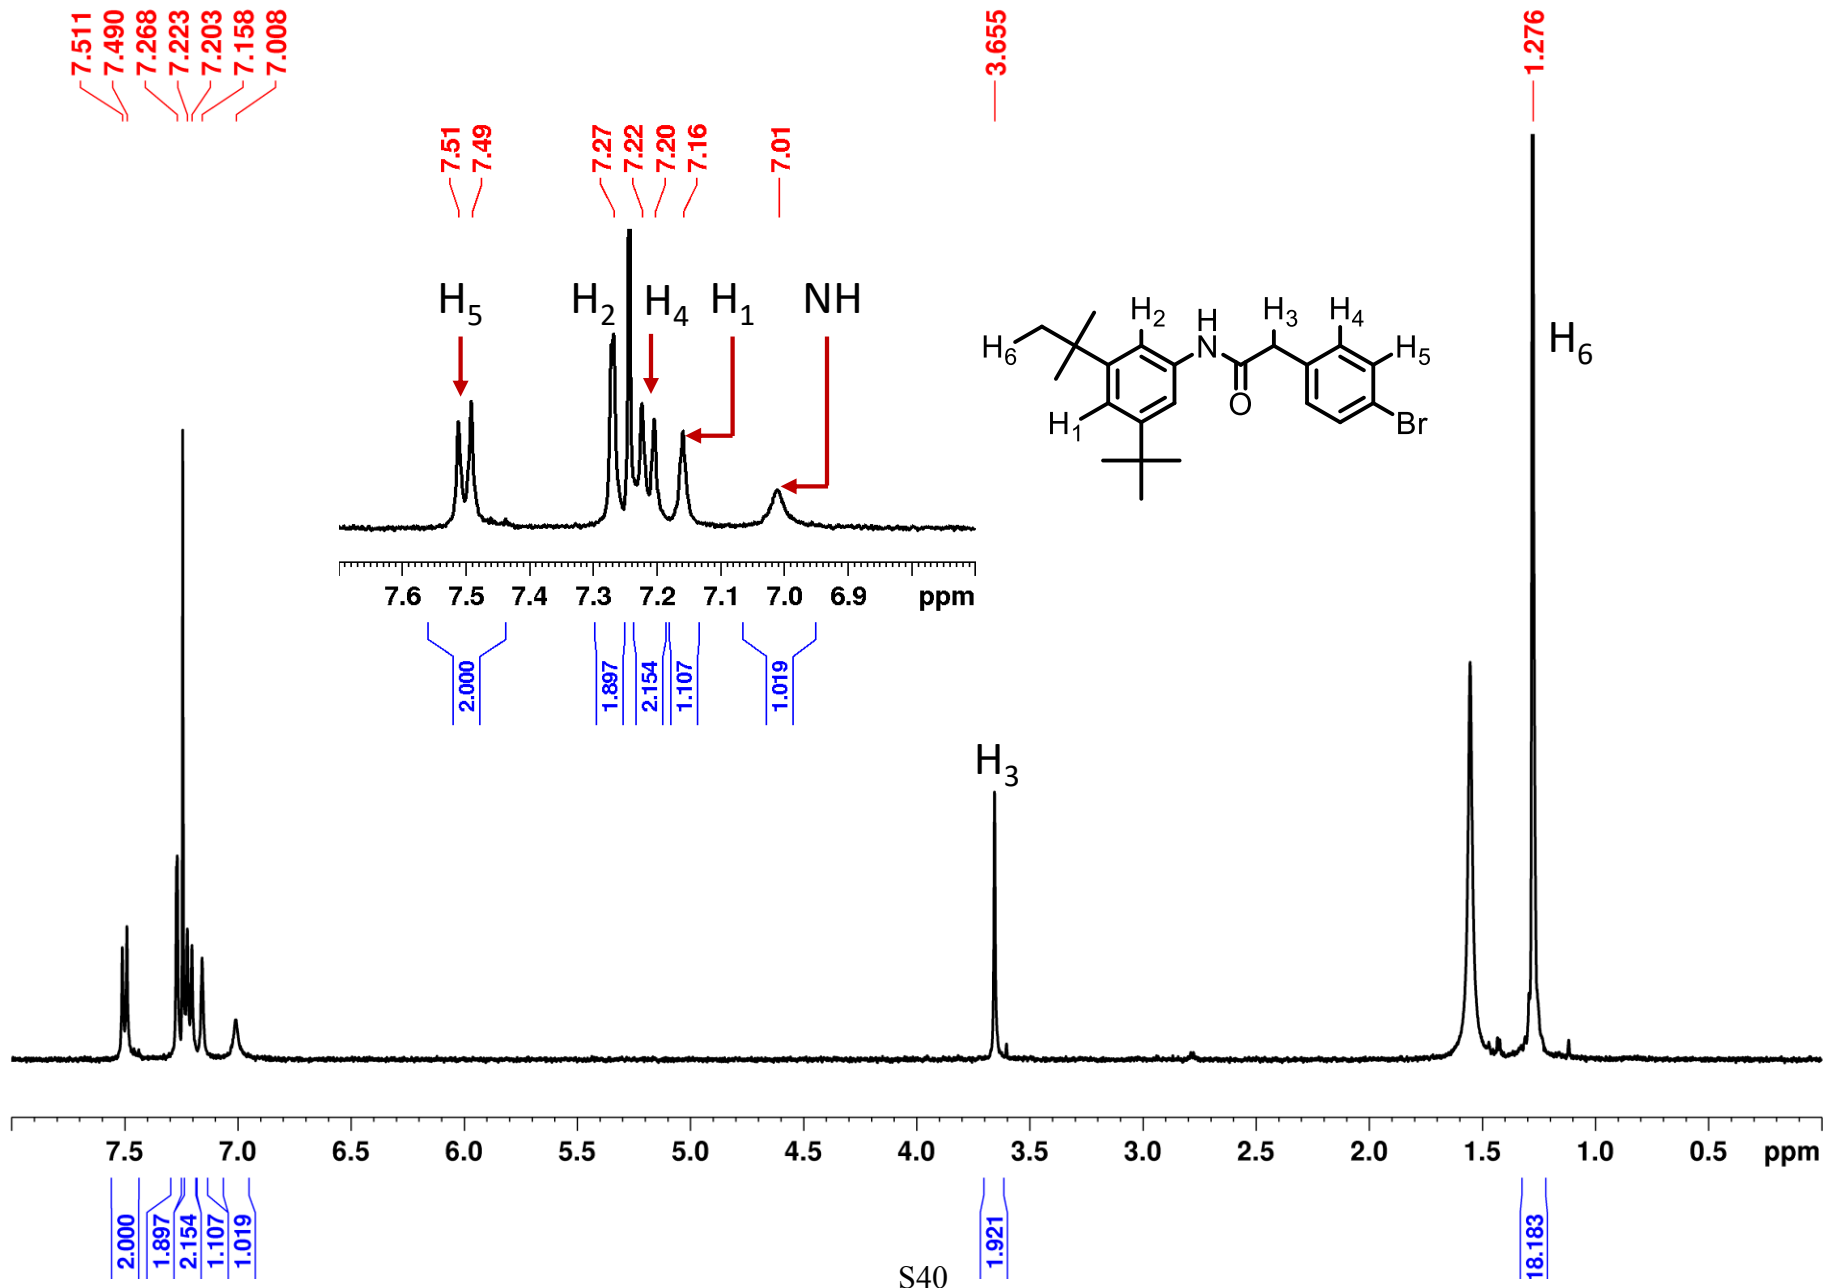



Figure S26  $^{13}\text{C}$  NMR Spectrum (100 MHz /  $\text{CDCl}_3$  / 298 K) of S2

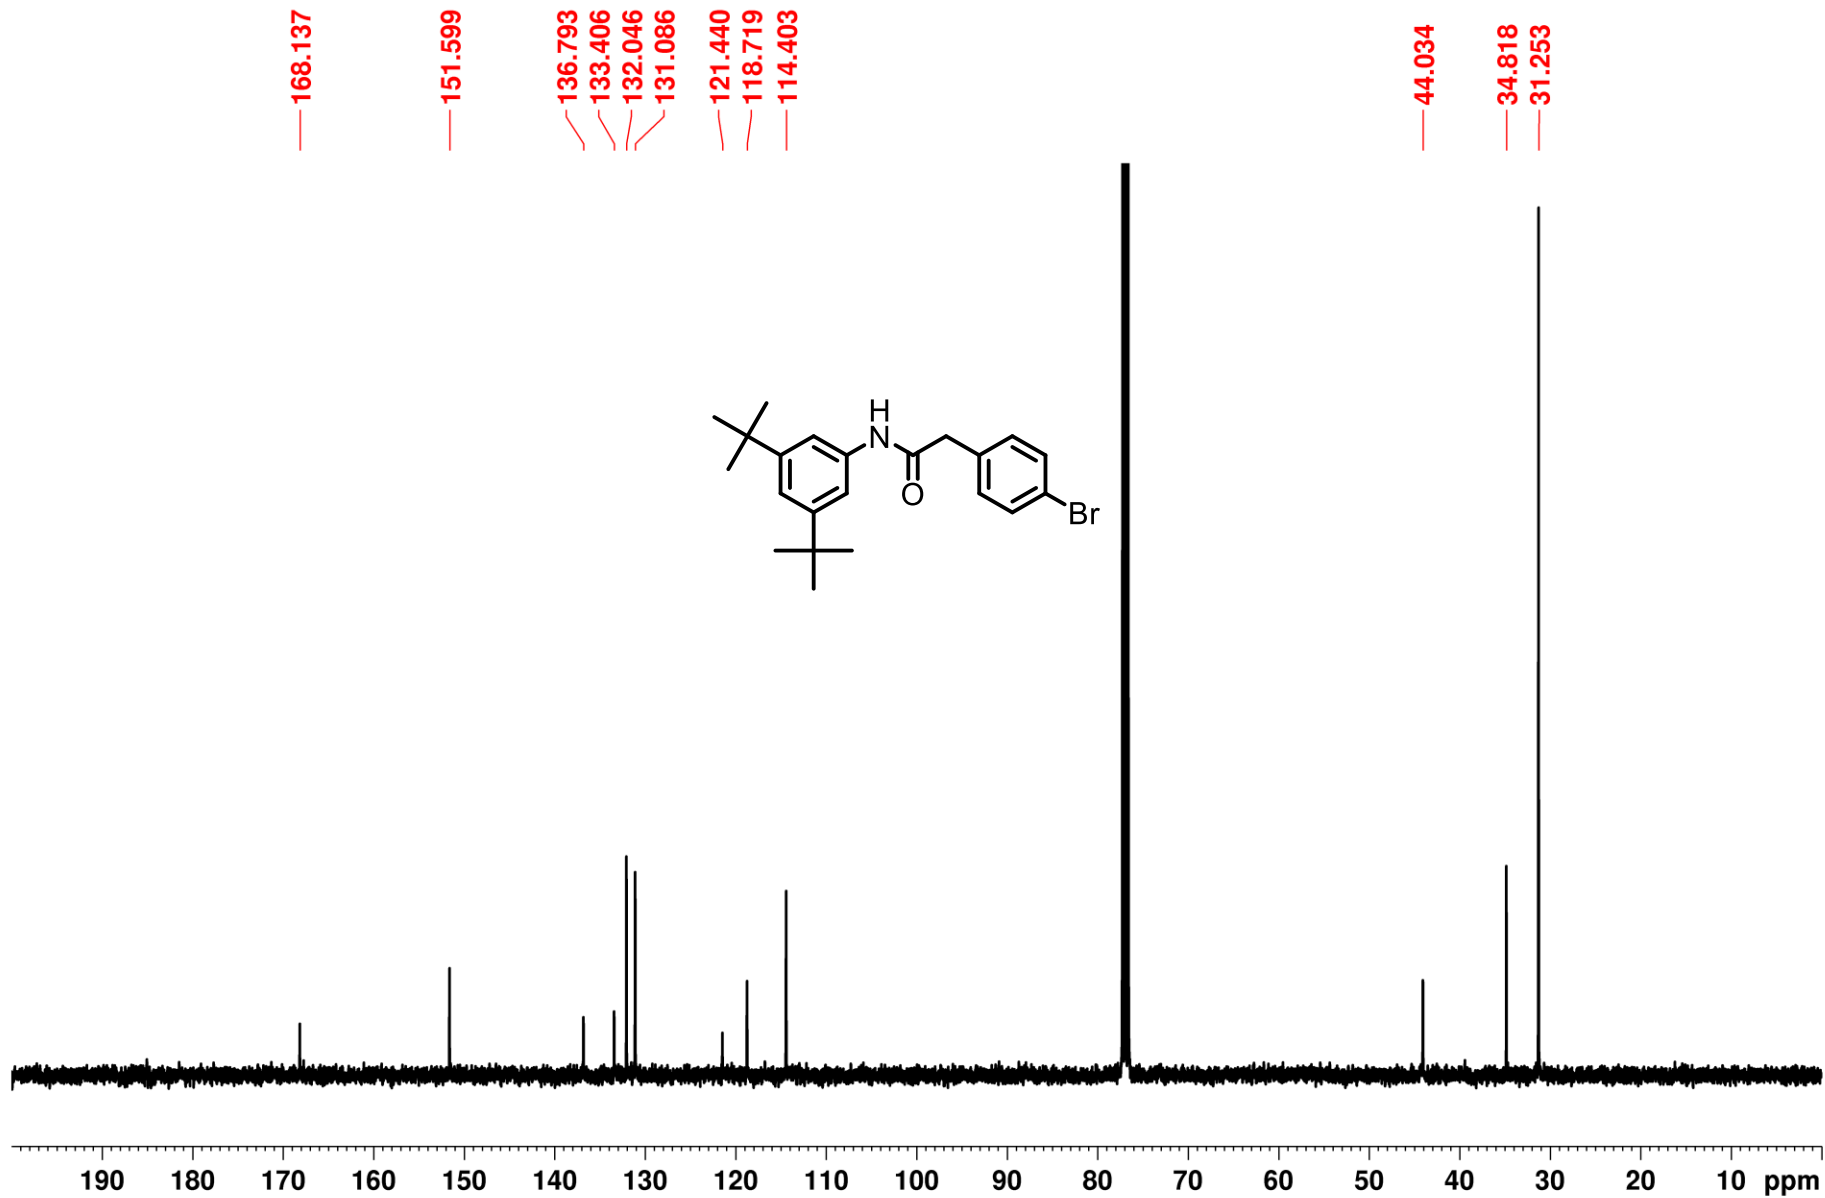

# Figure S27 ESI Mass Spectra of Compound S2

## Mass Spectrum SmartFormula Report

### Analysis Info

Analysis Name D:\Data\fish\data\2023q2(datas)\230612\230612\_amide-Br\_pl\_1-52\_01\_53840.d  
Method tune\_low\_pos\_LCMS\_with lock mass\_220107-3.m  
Sample Name 230612\_amide-Br\_pl  
Comment

Acquisition Date 6/12/2023 12:40:38 PM  
Operator Bruker microTOF-Q II  
Instrument / Ser# micrOTOF-Q 228888.10  
183

### Acquisition Parameter

|             |          |                       |           |                  |           |
|-------------|----------|-----------------------|-----------|------------------|-----------|
| Source Type | ESI      | Ion Polarity          | Positive  | Set Nebulizer    | 2.0 Bar   |
| Focus       | Active   | Set Capillary         | 4500 V    | Set Dry Heater   | 180 °C    |
| Scan Begin  | 50 m/z   | Set End Plate Offset  | -500 V    | Set Dry Gas      | 6.9 l/min |
| Scan End    | 3000 m/z | Set Collision Cell RF | 100.0 Vpp | Set Divert Valve | Waste     |

### +MS, 0.3-0.3min #15-19

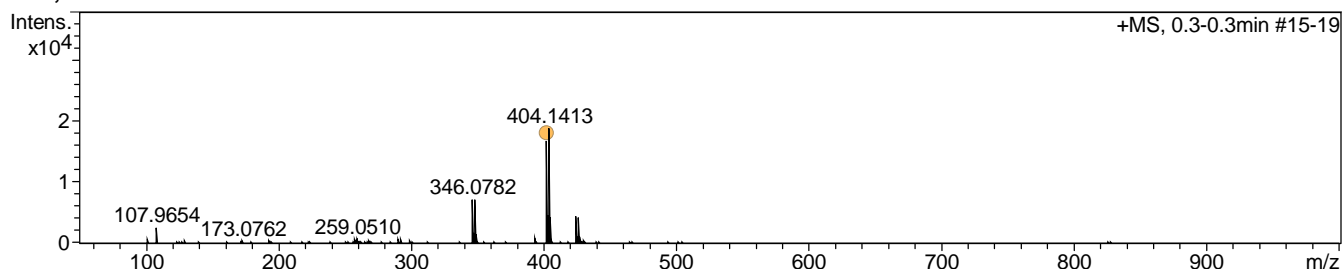

| Meas. m/z | # | Ion Formula | m/z      | err [mDa] | err [ppm] | mSigma | Score  | rdb | e <sup>-</sup> | Conf | N-Rule |
|-----------|---|-------------|----------|-----------|-----------|--------|--------|-----|----------------|------|--------|
| 402.1429  | 1 | C22H29BrNO  | 402.1427 | 0.2       | 0.4       | 48.7   | 100.00 | 8.5 | even           |      | ok     |

### +MS, 0.3-0.3min #15-19

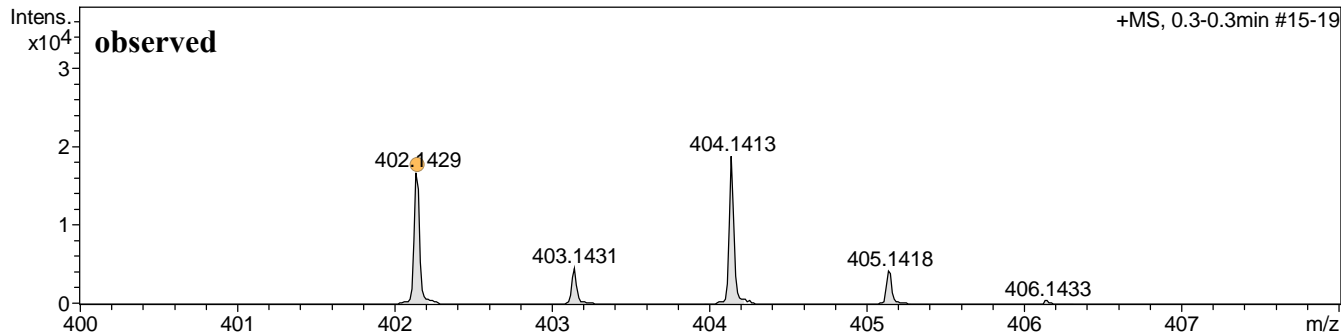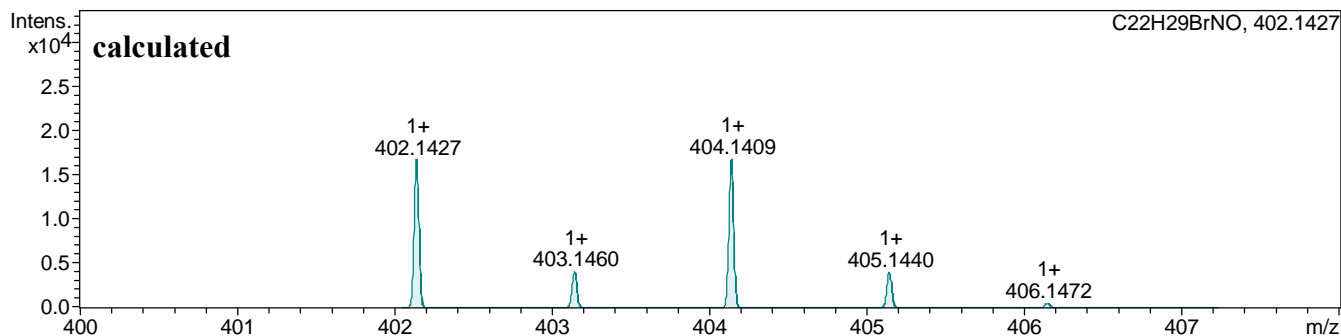

Figure S28  $^1\text{H}$  NMR Spectrum (400 MHz /  $\text{CD}_2\text{Cl}_2$  / 298 K) of S3

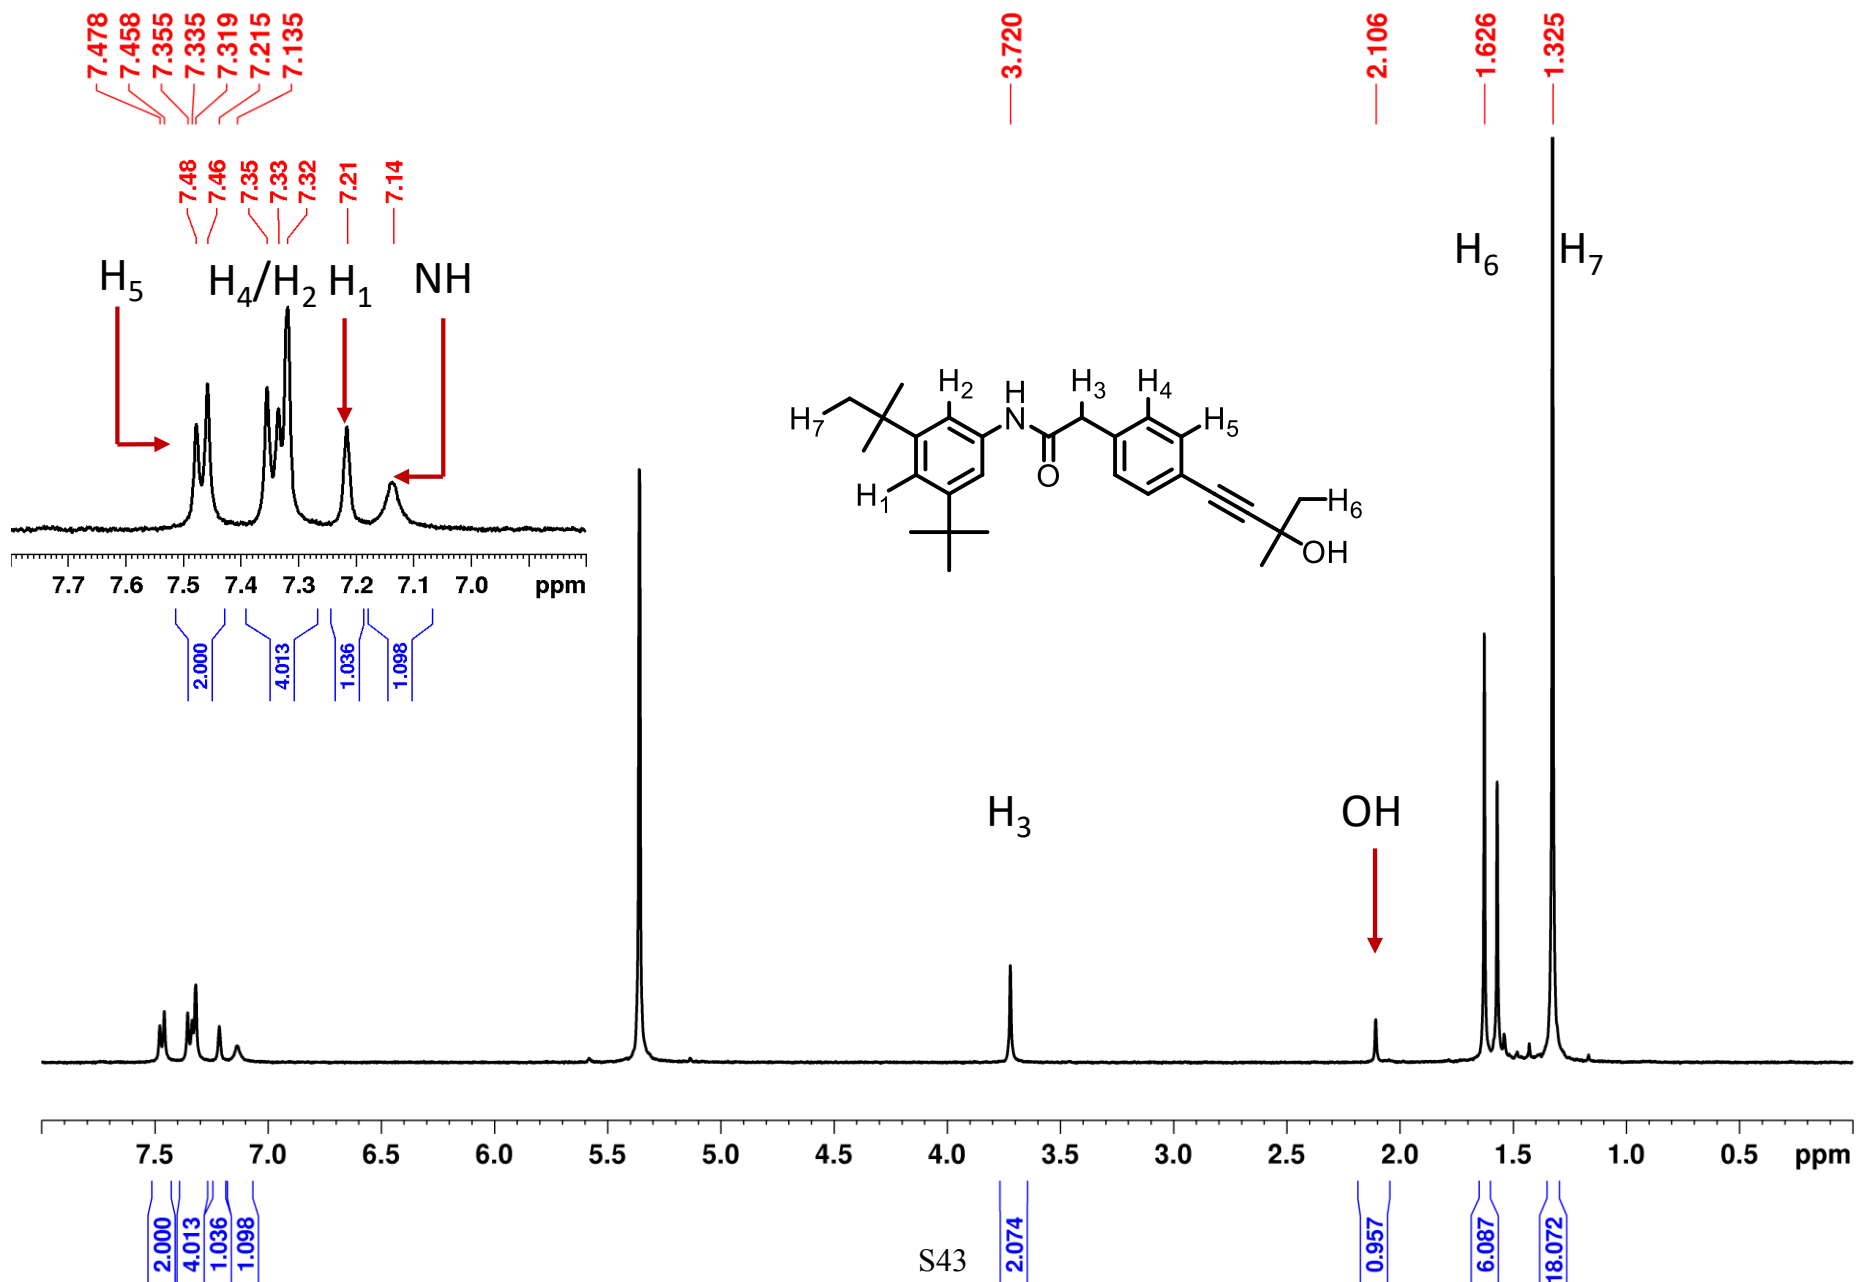

Figure S29  $^{13}\text{C}$  NMR Spectrum (100 MHz /  $\text{CDCl}_3$  / 298 K) of S3

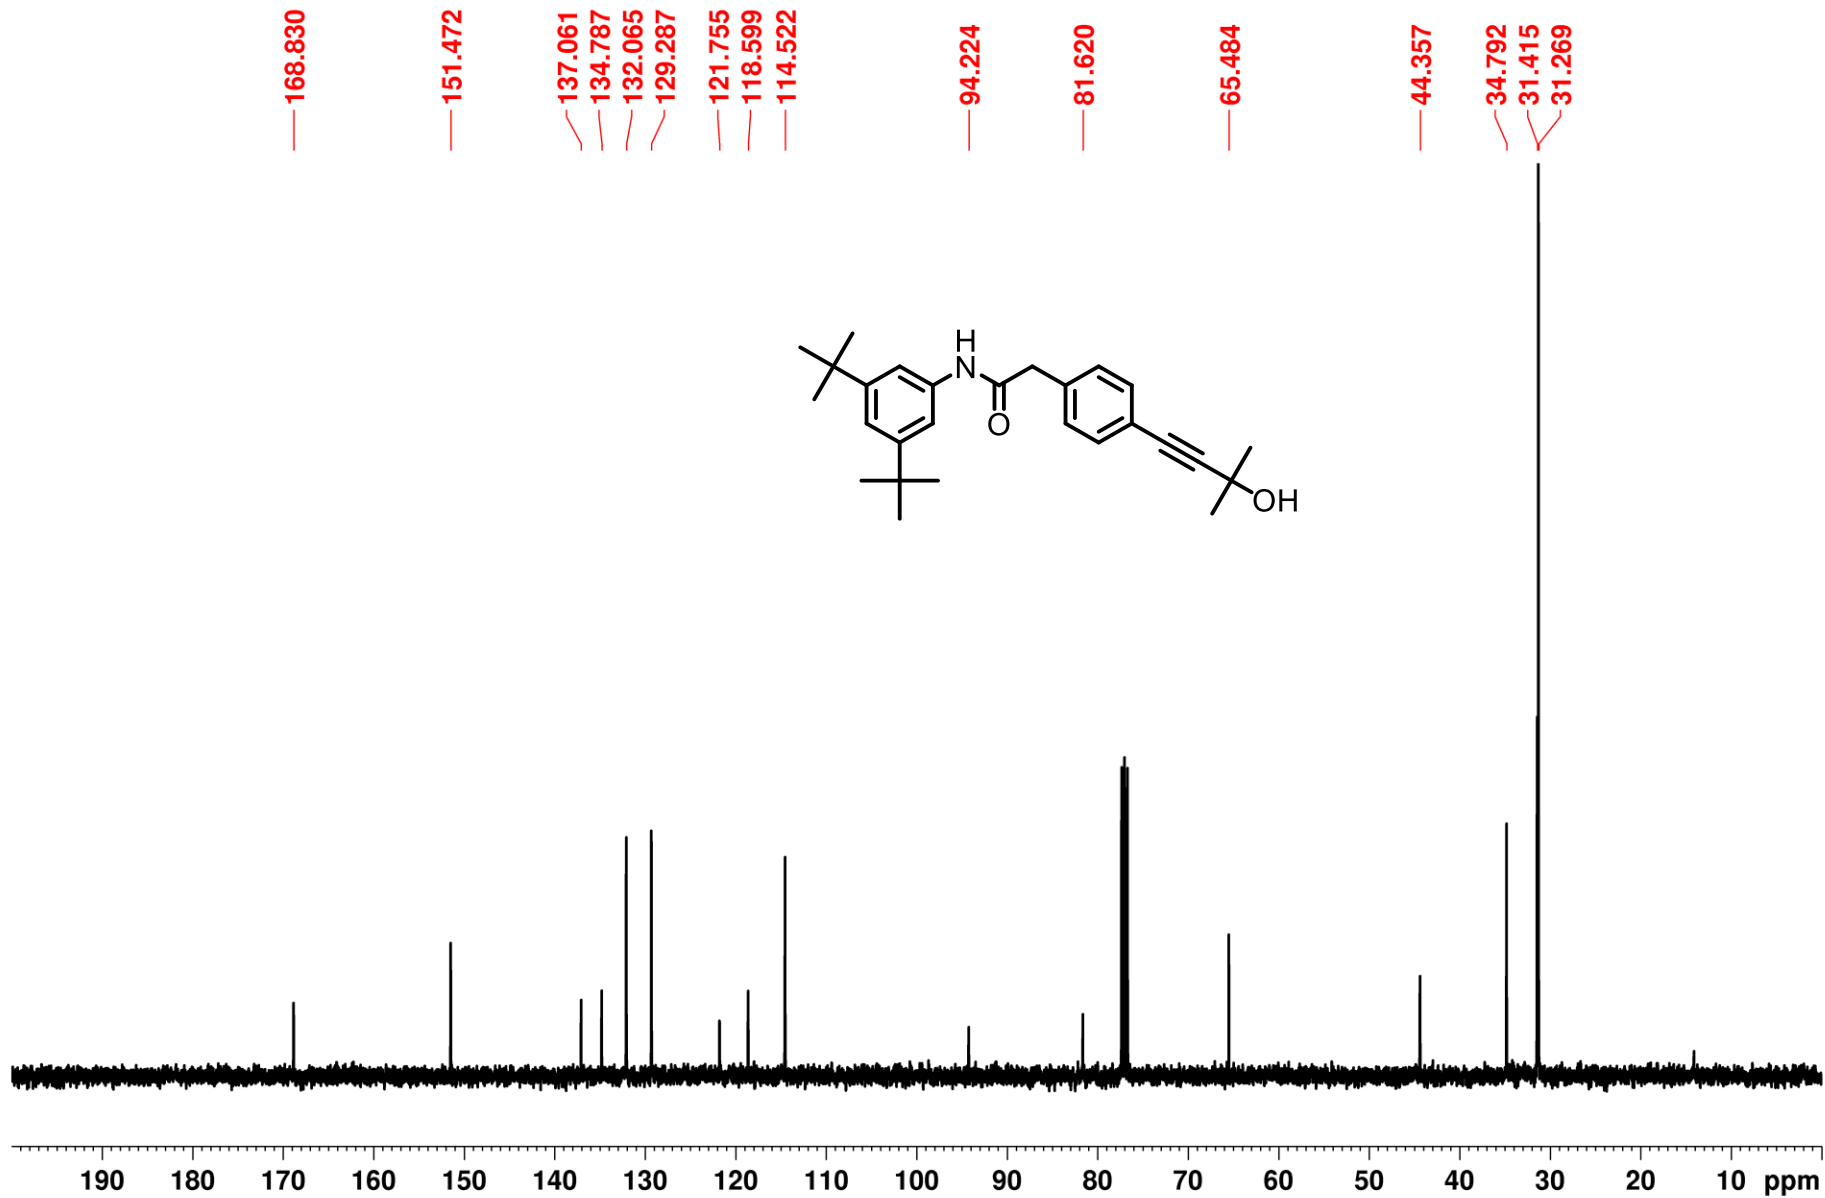

# Figure S30 ESI Mass Spectra of Compound S3

## Mass Spectrum SmartFormula Report

### Analysis Info

Analysis Name D:\Data\Fish\Data\2023Q2(datas)\230612\230612\_amide-yne-OH\_pl\_1-53\_01\_53841.d  
Method tune\_low\_pos\_LCMS\_with lock mass\_220107-3.m  
Sample Name 230612\_amide-yne-OH\_pl  
Comment  
Acquisition Date 6/12/2023 12:46:21 PM  
Operator Bruker microTOF-Q II  
Instrument / Ser# micrOTOF-Q 228888.10  
183

### Acquisition Parameter

|             |          |                       |           |                  |           |
|-------------|----------|-----------------------|-----------|------------------|-----------|
| Source Type | ESI      | Ion Polarity          | Positive  | Set Nebulizer    | 2.0 Bar   |
| Focus       | Active   | Set Capillary         | 4500 V    | Set Dry Heater   | 180 °C    |
| Scan Begin  | 50 m/z   | Set End Plate Offset  | -500 V    | Set Dry Gas      | 6.9 l/min |
| Scan End    | 3000 m/z | Set Collision Cell RF | 100.0 Vpp | Set Divert Valve | Waste     |

### +MS, 0.1-0.2min #8-10

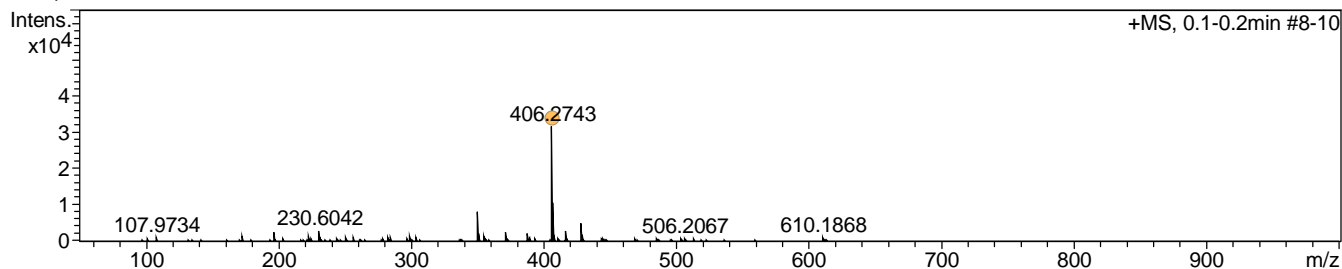

| Meas. m/z | # | Ion Formula | m/z      | err [mDa] | err [ppm] | mSigma | Score  | rdb  | e <sup>-</sup> Conf | N-Rule |
|-----------|---|-------------|----------|-----------|-----------|--------|--------|------|---------------------|--------|
| 406.2743  | 1 | C27H36NO2   | 406.2741 | 0.3       | 0.7       | 15.0   | 100.00 | 10.5 | even                | ok     |

### +MS, 0.1-0.2min #8-10

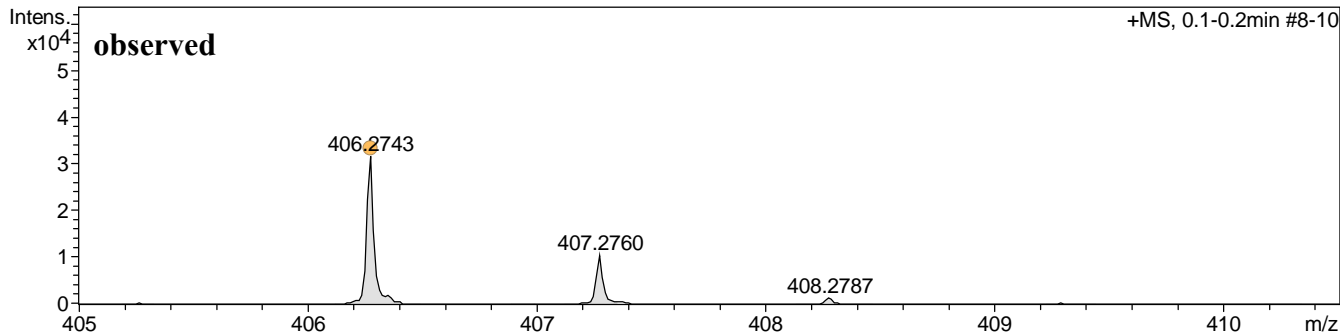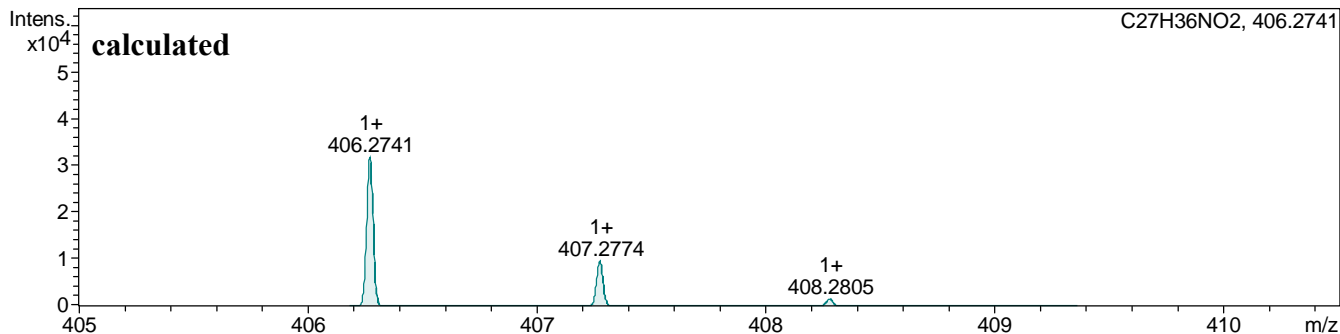

Figure S31  $^1\text{H}$  NMR Spectrum (400 MHz /  $\text{CDCl}_3$  / 298 K) of S4

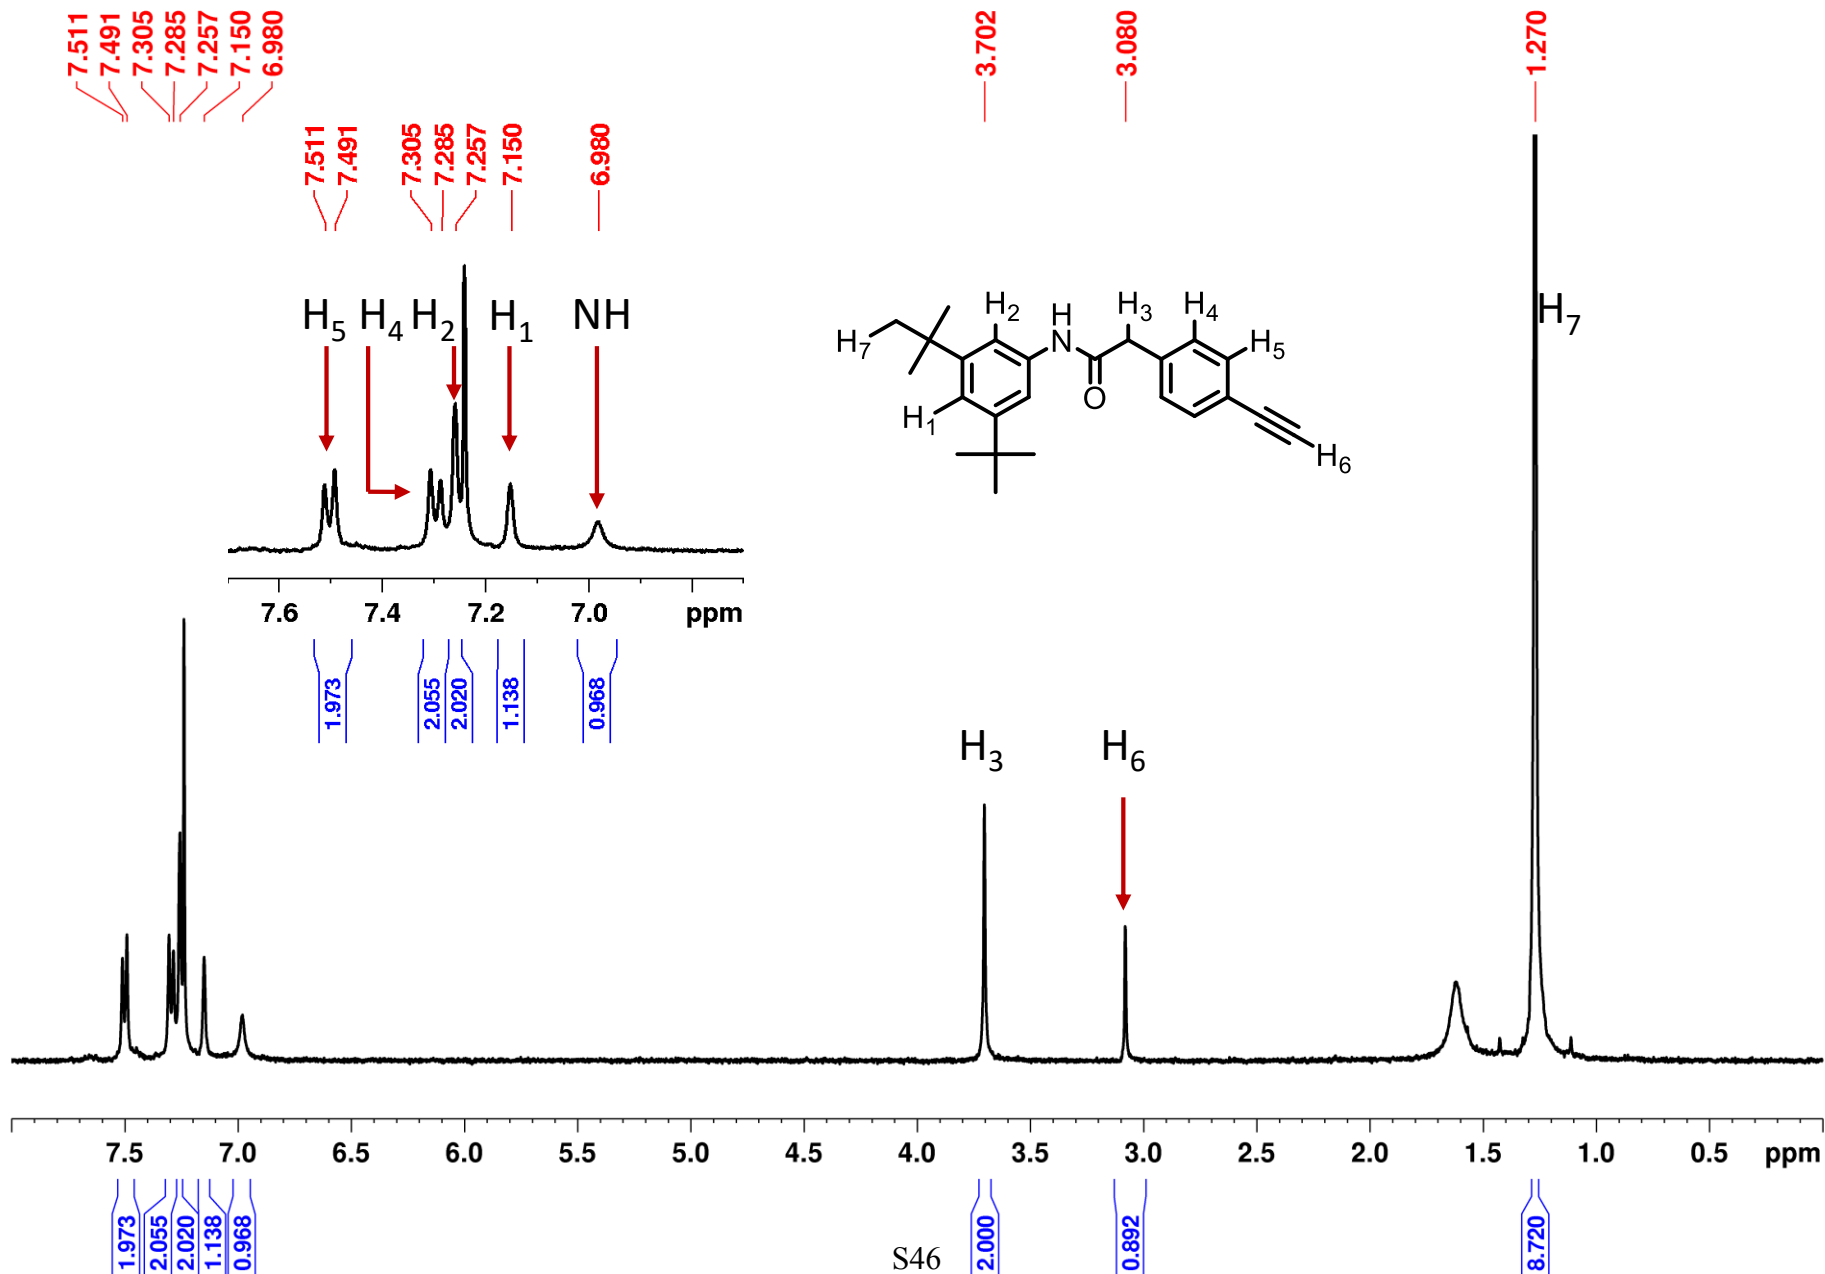

Figure S32  $^{13}\text{C}$  NMR Spectrum (100 MHz /  $\text{CDCl}_3$  / 298 K) of S4

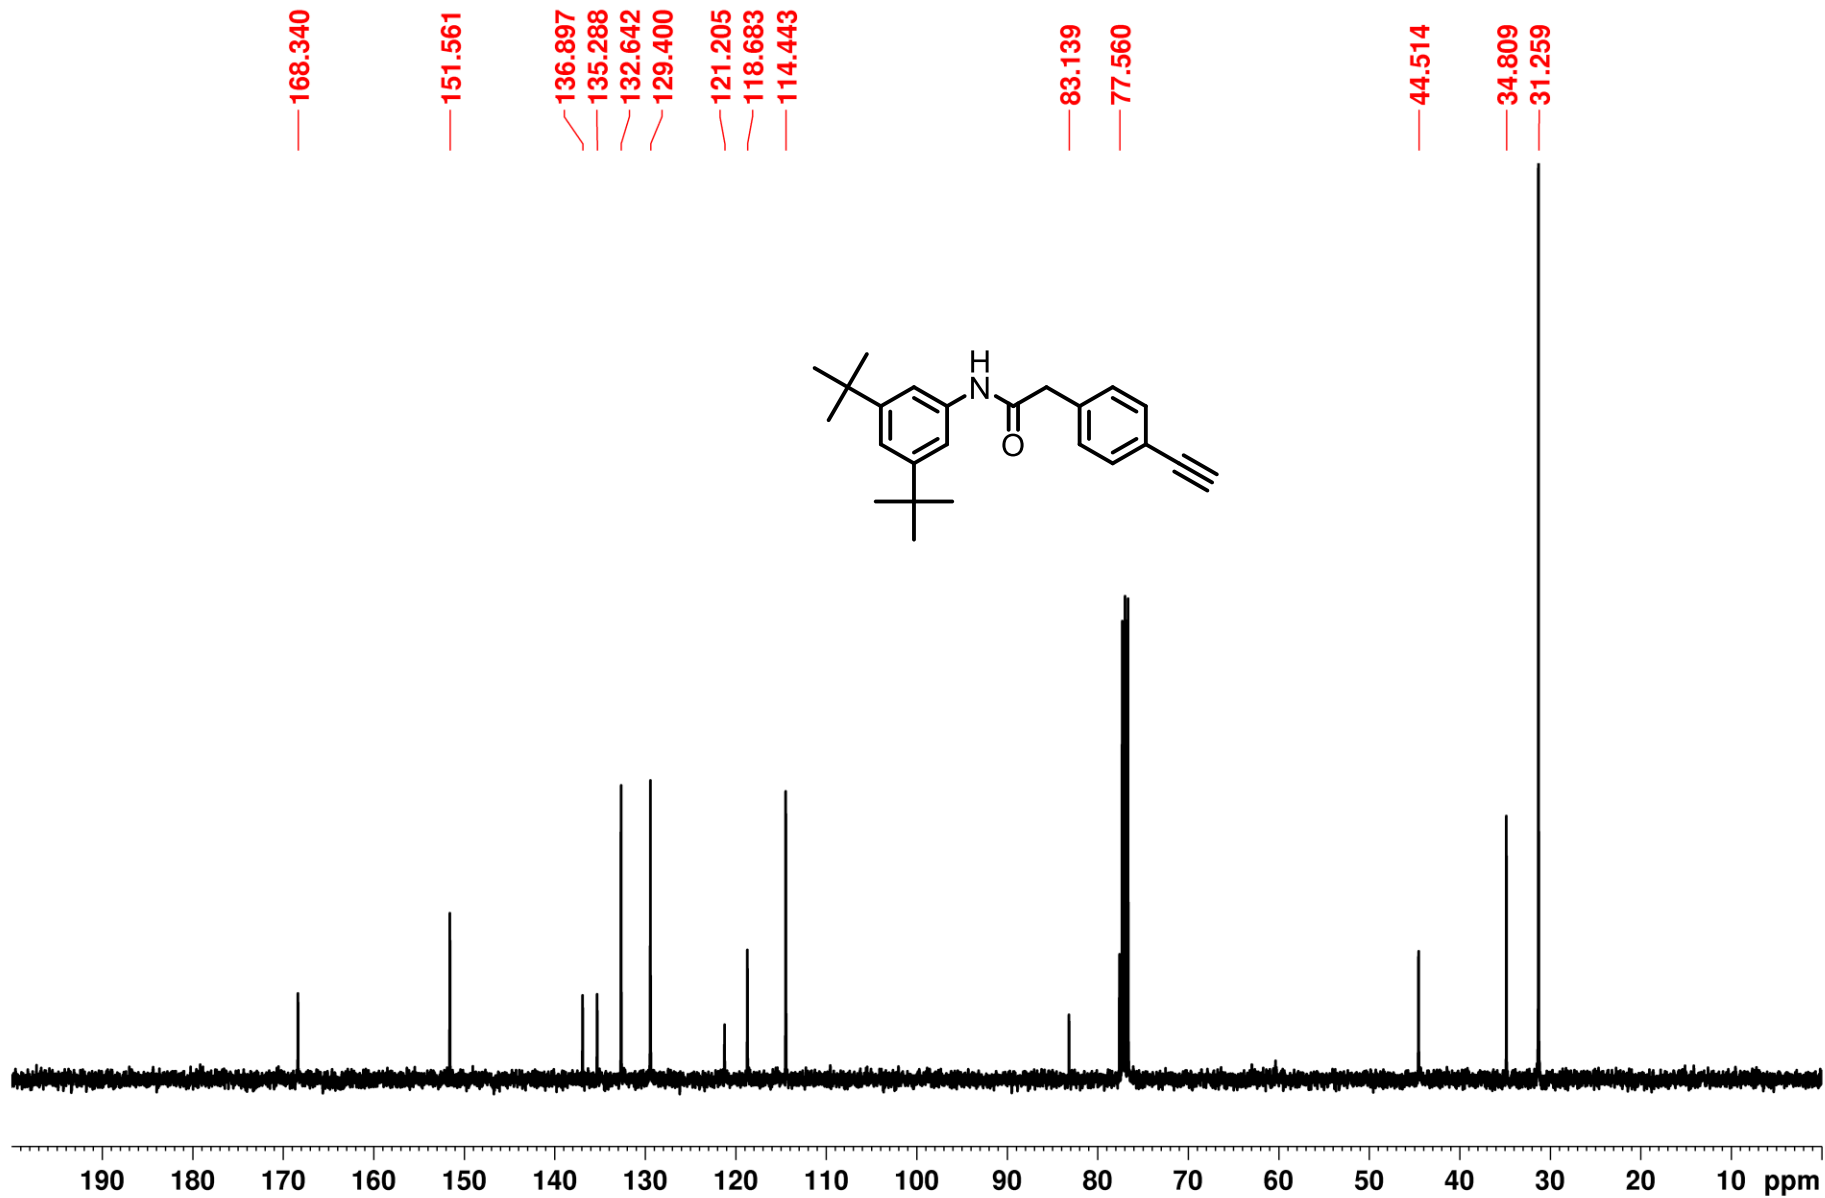

# Figure S33 ESI Mass Spectra of Compound S4

## Mass Spectrum SmartFormula Report

### Analysis Info

Analysis Name D:\Data\Fish\Data\2023Q2(datas)\230612\230612\_amide-yne\_pl\_1-54\_01\_53842.d  
Method tune\_low\_pos\_LCMS\_with lock mass\_220107-3.m  
Sample Name 230612\_amide-yne\_pl  
Comment

Acquisition Date 6/12/2023 12:52:03 PM  
Operator Bruker microTOF-Q II  
Instrument / Ser# micrOTOF-Q 228888.10  
183

### Acquisition Parameter

|             |          |                       |           |                  |           |
|-------------|----------|-----------------------|-----------|------------------|-----------|
| Source Type | ESI      | Ion Polarity          | Positive  | Set Nebulizer    | 2.0 Bar   |
| Focus       | Active   | Set Capillary         | 4500 V    | Set Dry Heater   | 180 °C    |
| Scan Begin  | 50 m/z   | Set End Plate Offset  | -500 V    | Set Dry Gas      | 6.9 l/min |
| Scan End    | 3000 m/z | Set Collision Cell RF | 100.0 Vpp | Set Divert Valve | Waste     |

### +MS, 0.2-0.2min #9-12

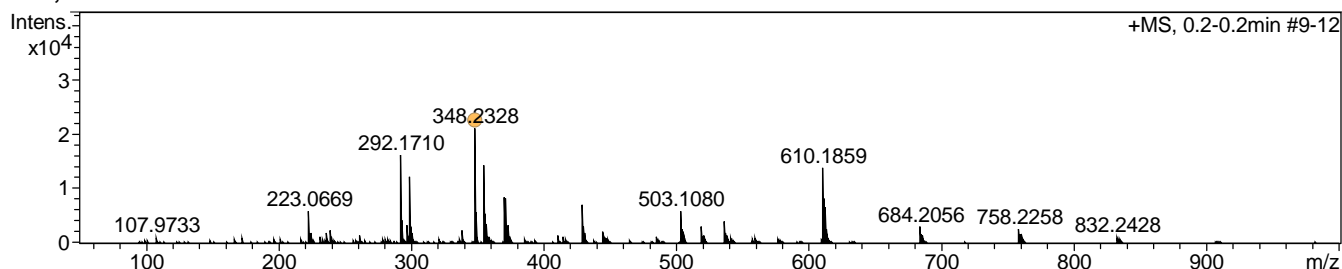

| Meas. m/z | # | Ion Formula | m/z      | err [mDa] | err [ppm] | mSigma | Score  | rdb  | e <sup>-</sup> | Conf | N-Rule |
|-----------|---|-------------|----------|-----------|-----------|--------|--------|------|----------------|------|--------|
| 348.2328  | 1 | C24H30NO    | 348.2322 | 0.6       | 1.7       | 0.8    | 100.00 | 10.5 | even           |      | ok     |

### +MS, 0.2-0.2min #9-12

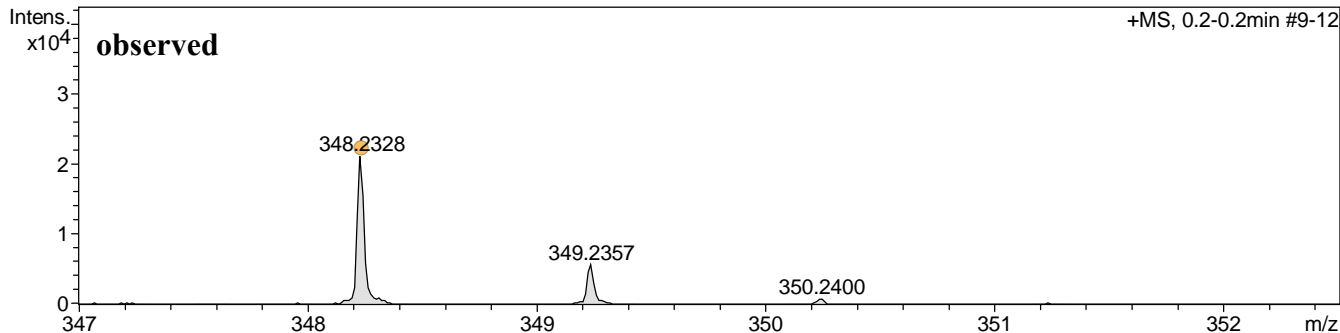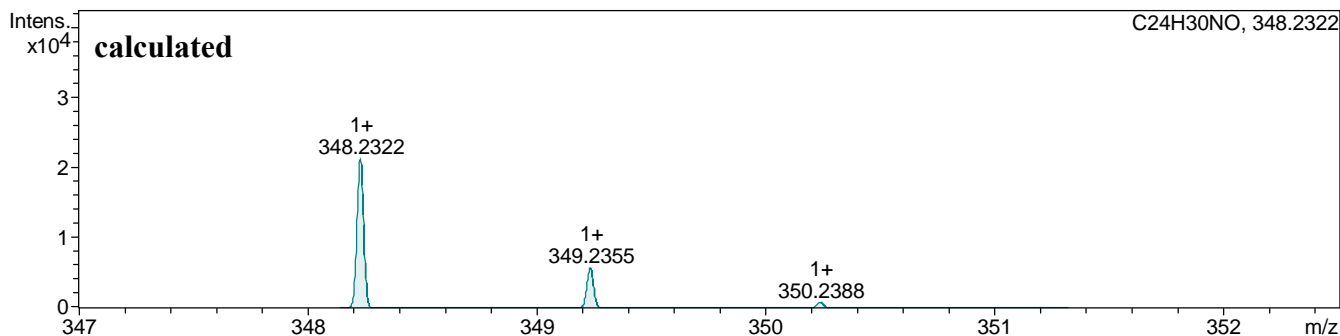



Figure S34  $^1\text{H}$  NMR Spectrum (400 MHz /  $\text{CD}_3\text{SOCD}_3$  / 298 K) of **S5**

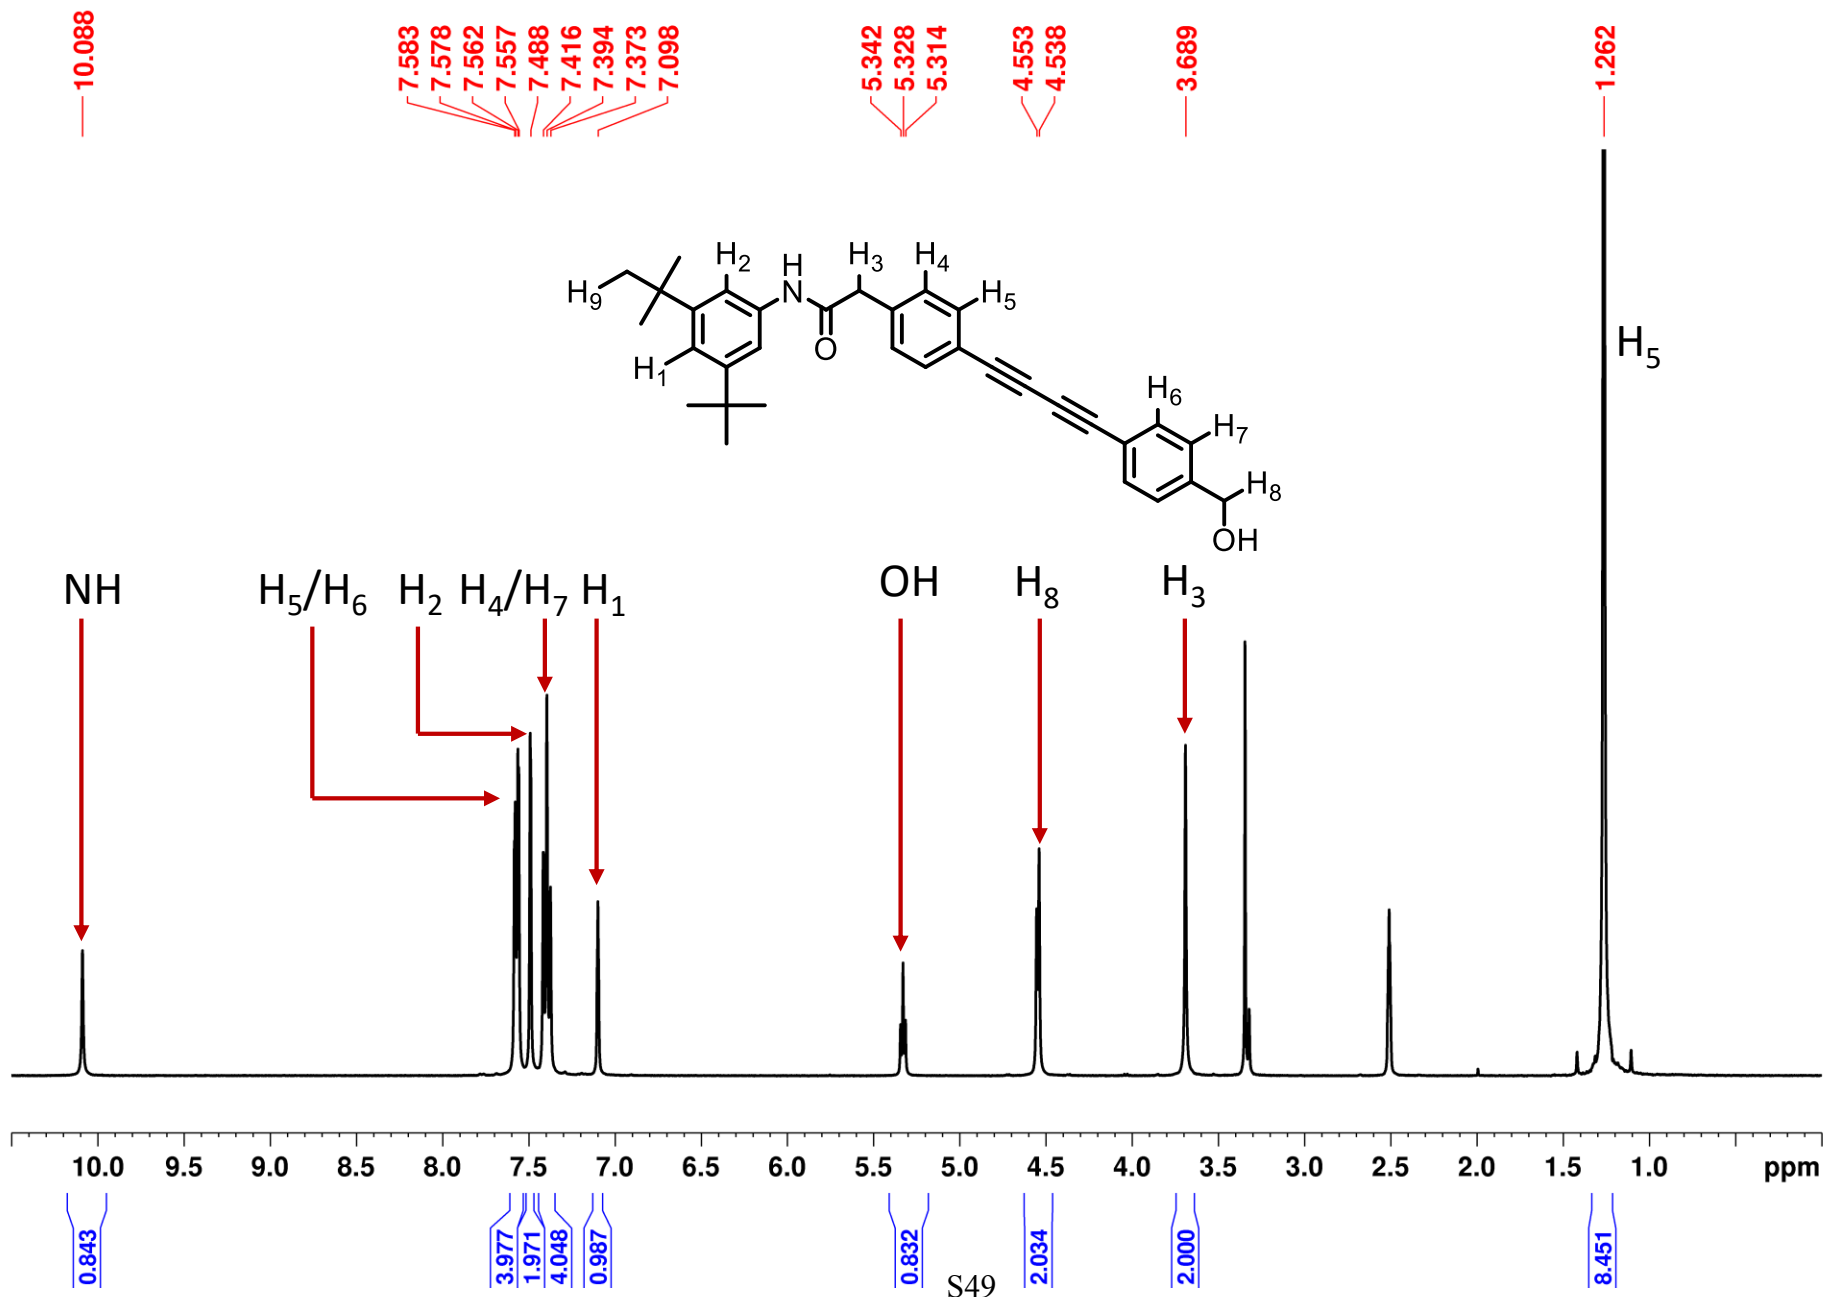

Figure S35  $^{13}\text{C}$  NMR Spectrum (100 MHz /  $\text{CD}_2\text{Cl}_2$  / 298 K) of S5

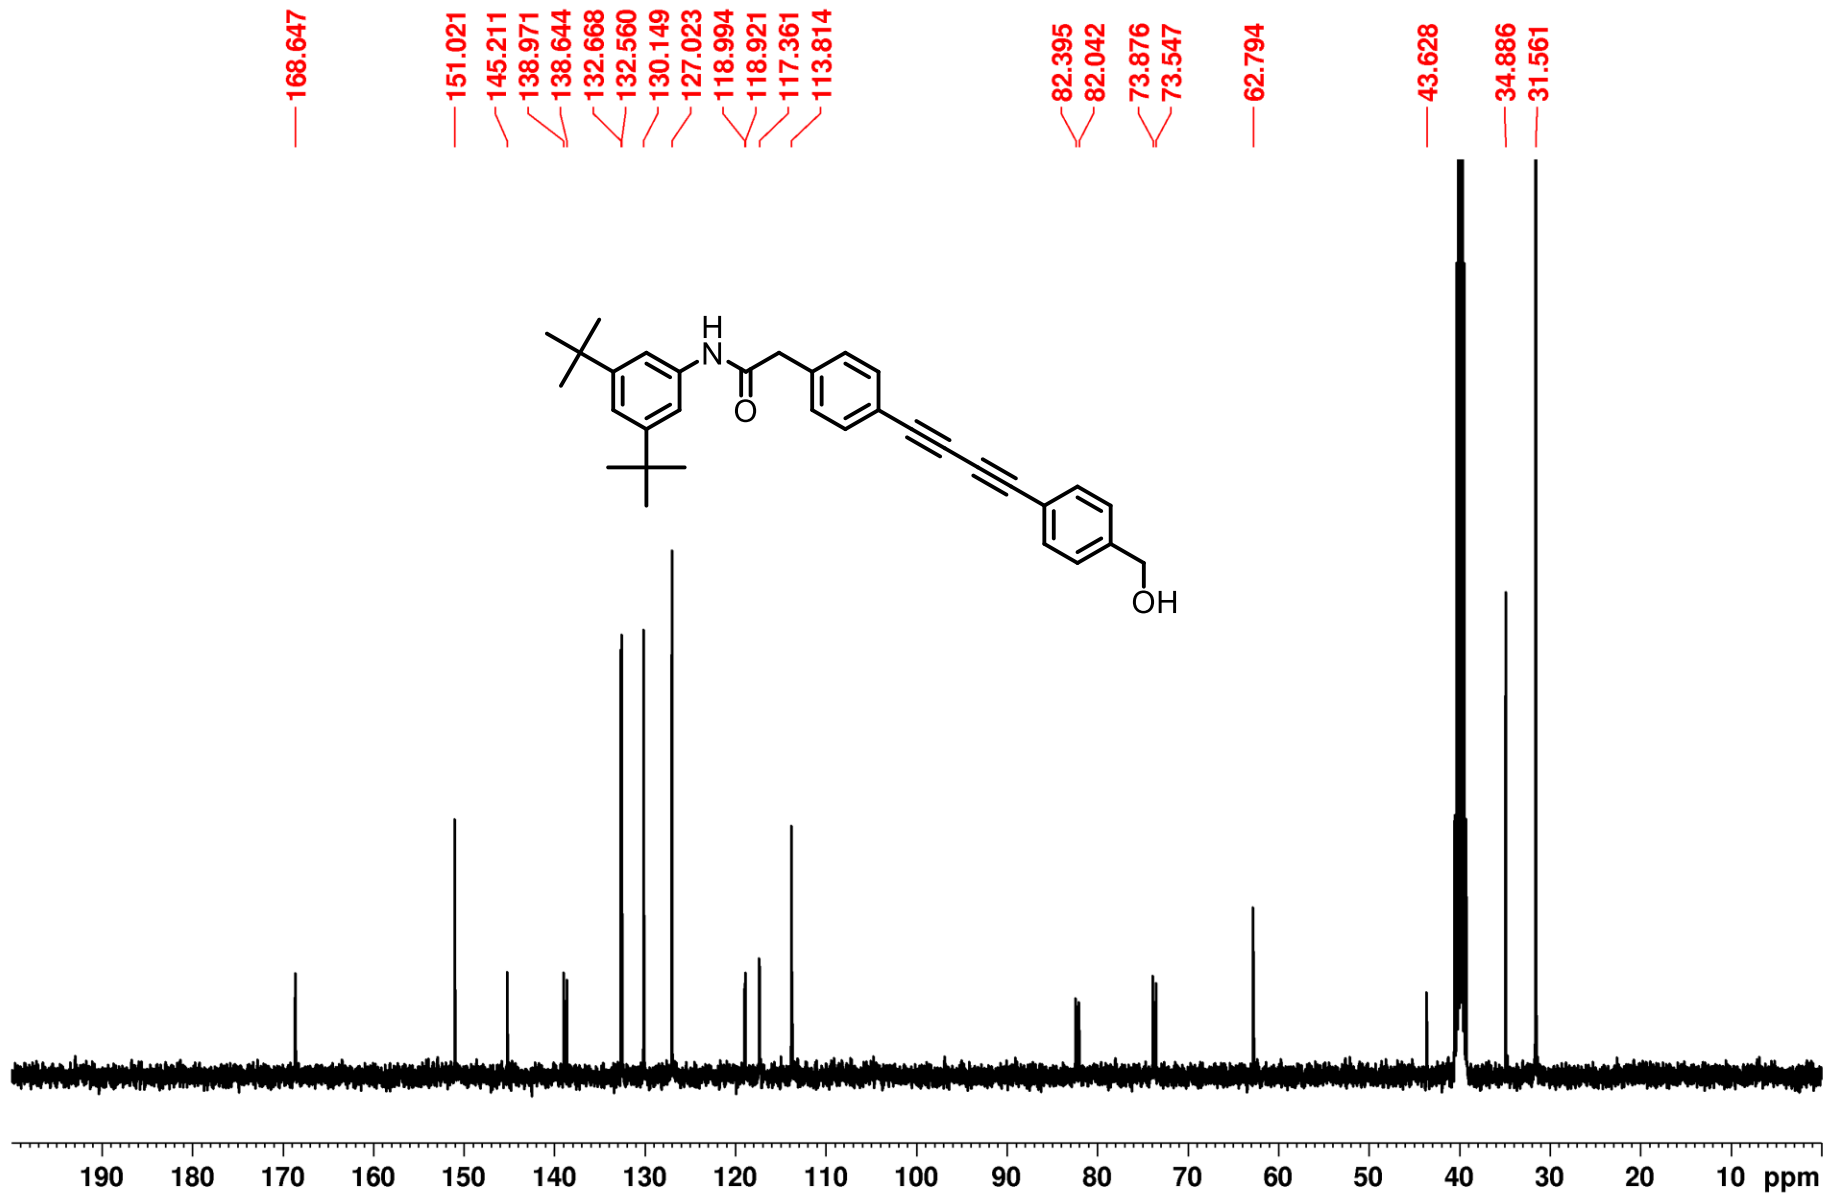

# Figure S36 ESI Mass Spectra of Compound S5

## Mass Spectrum SmartFormula Report

### Analysis Info

Analysis Name D:\Data\fish\data\2023q2(datas)\230626\230626-2\_amide-diyne-OH\_pl\_1-79\_01\_53986.d  
Method tune\_low\_pos\_LCMS\_with lock mass\_220107-3.m  
Sample Name 230626-2\_amide-diyne-OH\_pl  
Comment

Acquisition Date 6/26/2023 3:03:22 PM  
Operator Bruker microTOF-Q II  
Instrument / Ser# micrOTOF-Q 228888.10  
183

### Acquisition Parameter

|             |          |                       |           |                  |           |
|-------------|----------|-----------------------|-----------|------------------|-----------|
| Source Type | ESI      | Ion Polarity          | Positive  | Set Nebulizer    | 2.0 Bar   |
| Focus       | Active   | Set Capillary         | 4500 V    | Set Dry Heater   | 180 °C    |
| Scan Begin  | 50 m/z   | Set End Plate Offset  | -500 V    | Set Dry Gas      | 6.9 l/min |
| Scan End    | 3000 m/z | Set Collision Cell RF | 100.0 Vpp | Set Divert Valve | Waste     |

### +MS, 0.5-0.5min #27-31

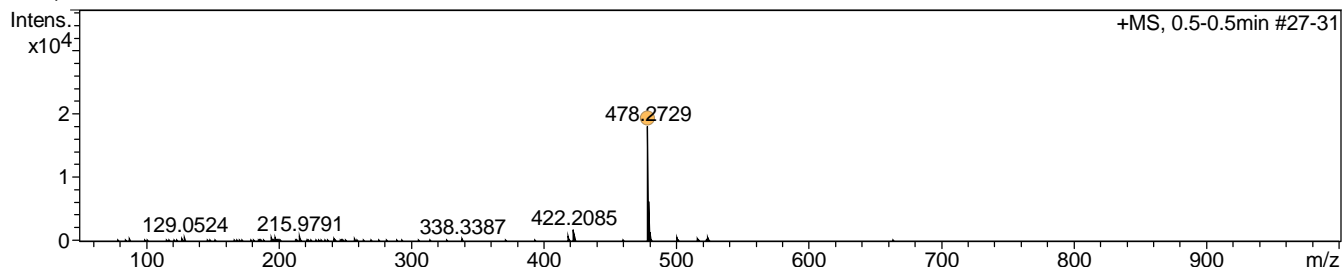

| Meas. m/z | # | Ion Formula | m/z      | err [mDa] | err [ppm] | mSigma | Score  | rdb  | e <sup>-</sup> Conf | N-Rule |
|-----------|---|-------------|----------|-----------|-----------|--------|--------|------|---------------------|--------|
| 478.2729  | 1 | C33H36NO2   | 478.2741 | 1.2       | 2.5       | 12.4   | 100.00 | 16.5 | even                | ok     |

### +MS, 0.5-0.5min #27-31

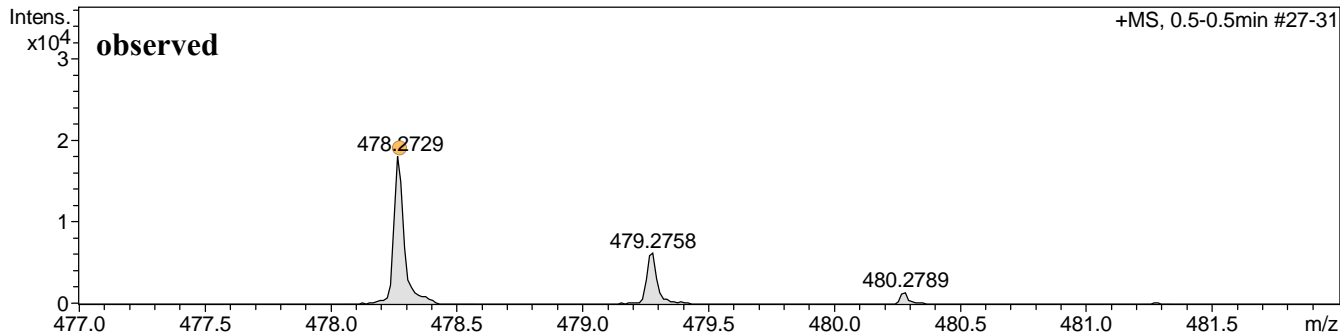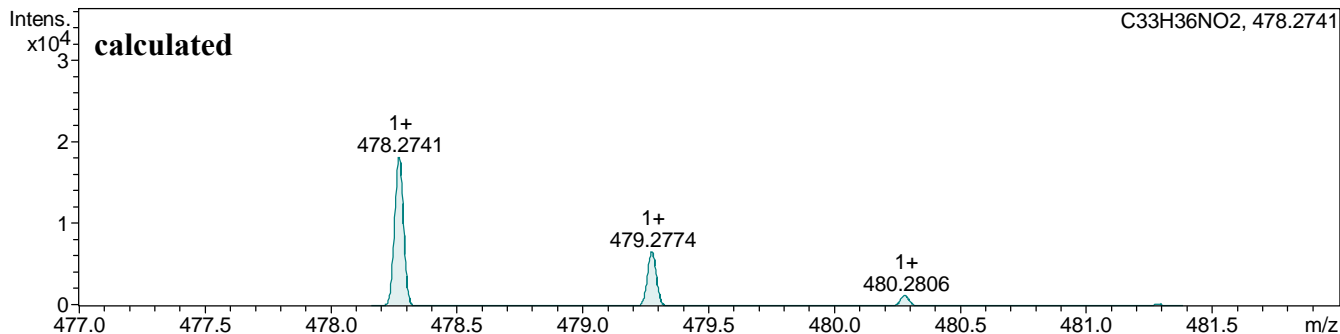

Figure S37  $^1\text{H}$  NMR Spectrum (400 MHz /  $\text{CD}_2\text{Cl}_2$  / 298 K) of S6

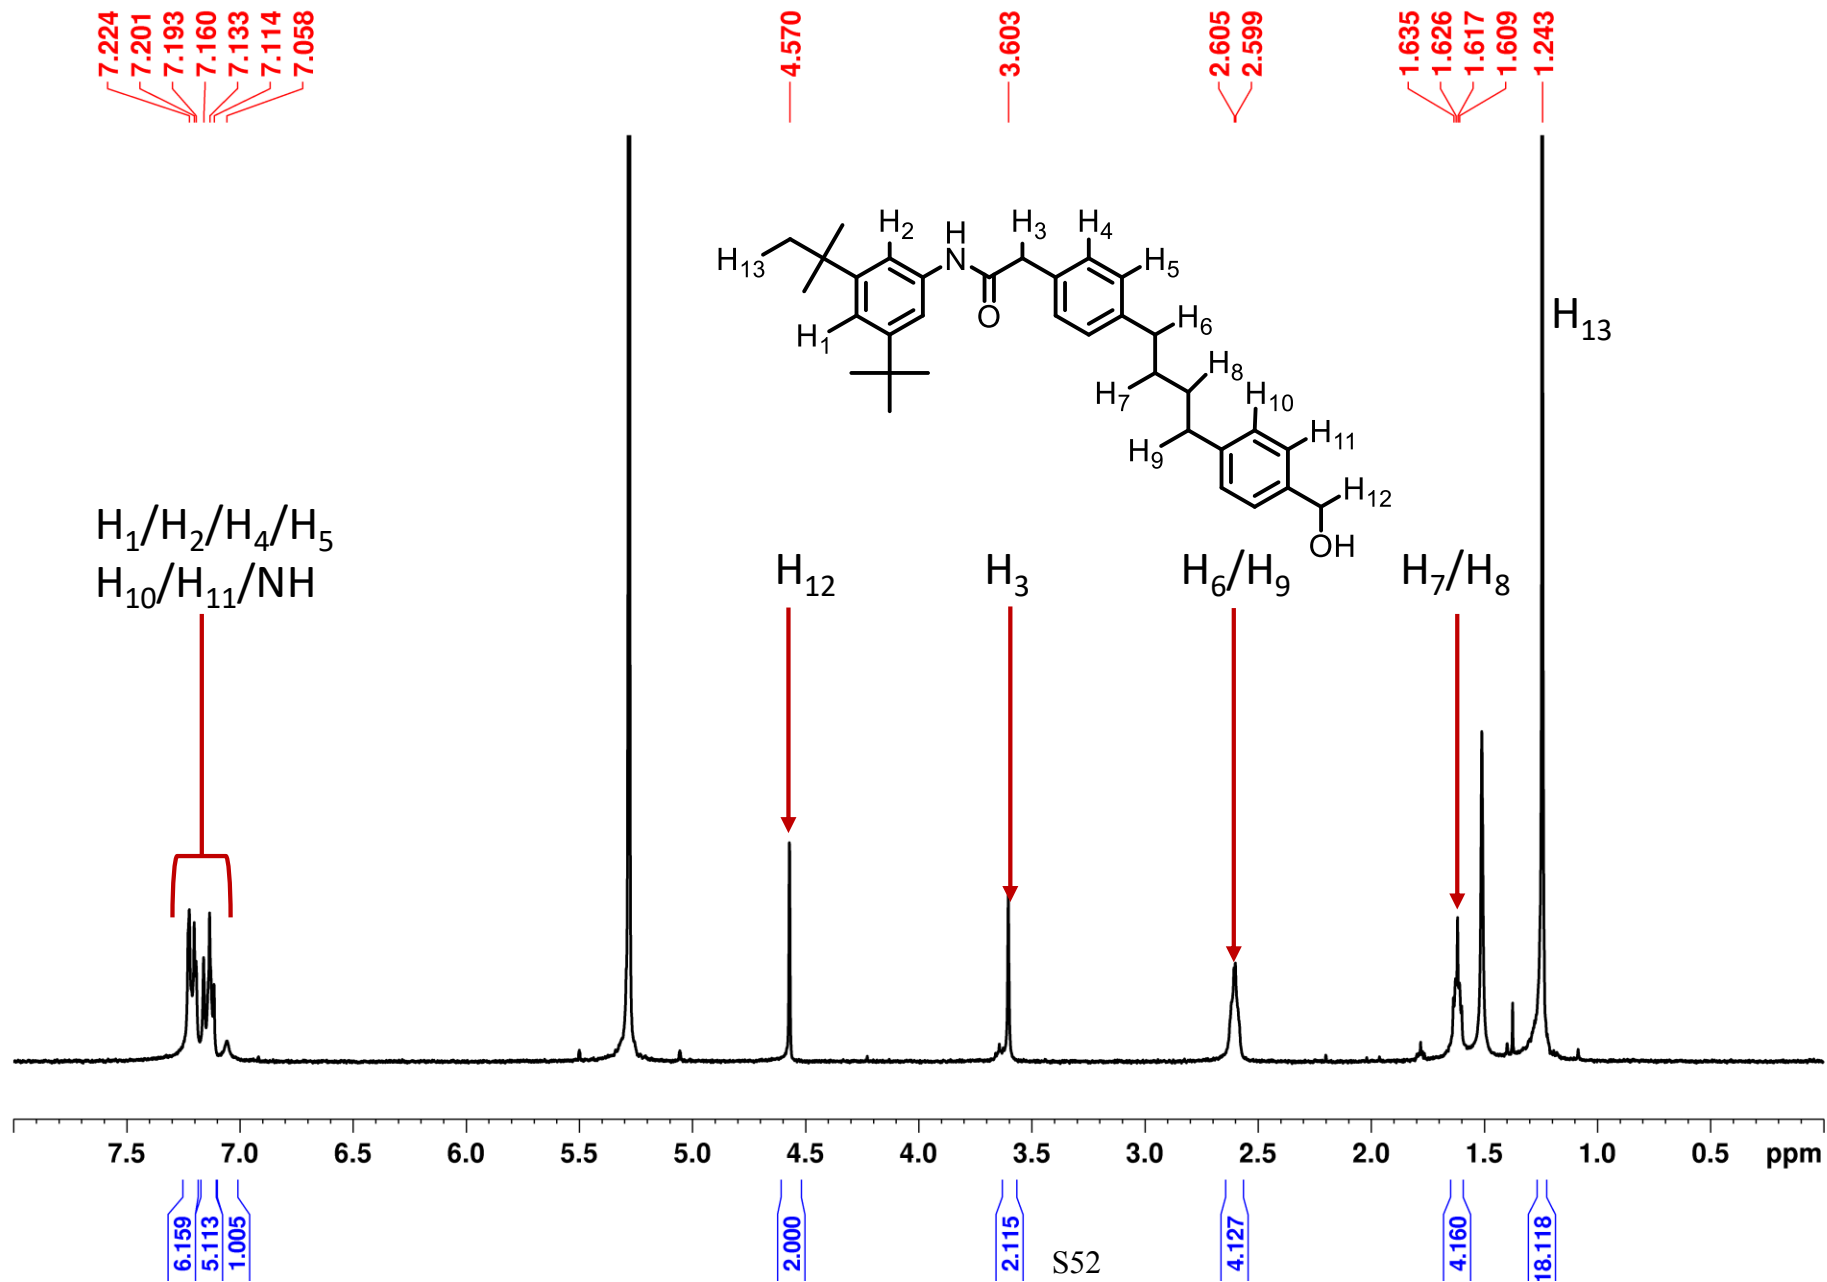

Figure S38  $^{13}\text{C}$  NMR Spectrum (100 MHz /  $\text{CDCl}_3$  / 298 K) of S6

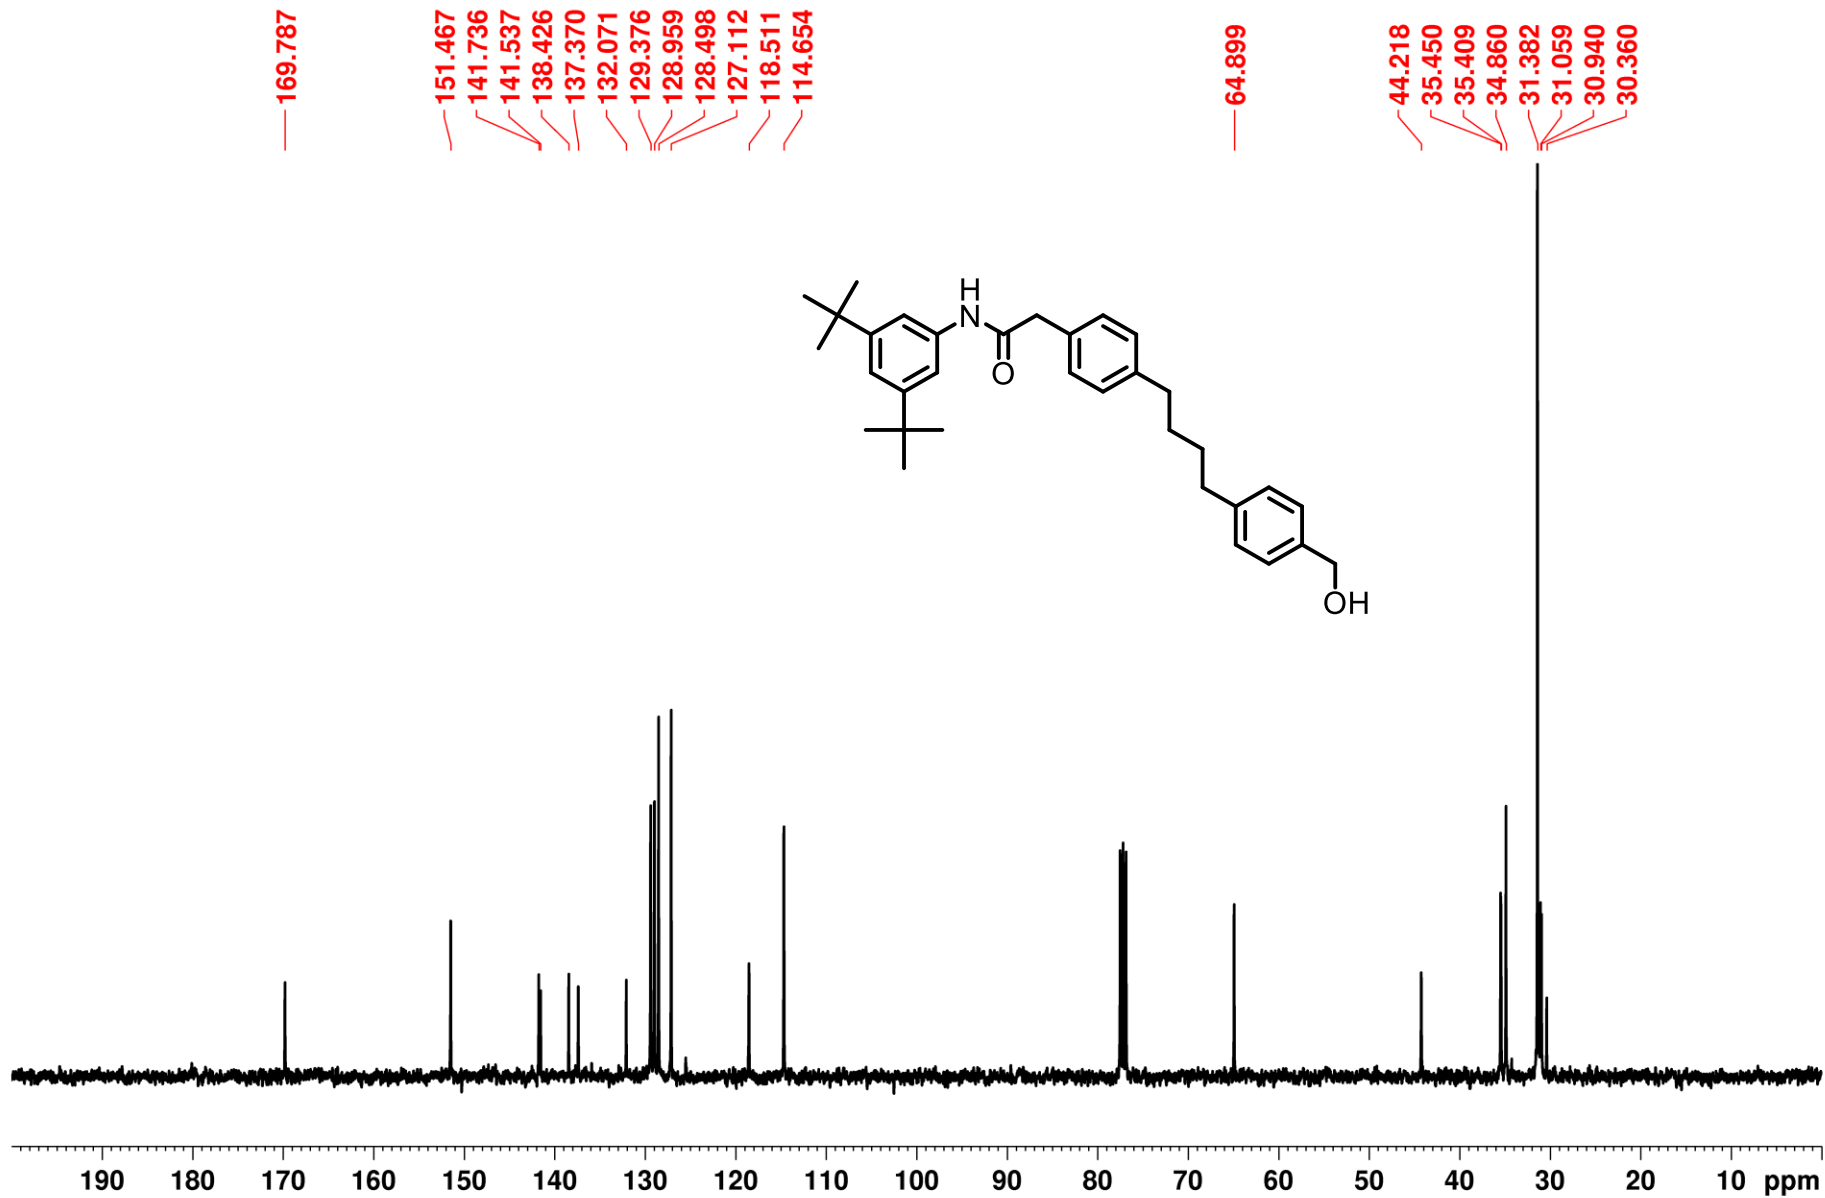

# Figure S39 ESI Mass Spectra of Compound S6

## Mass Spectrum SmartFormula Report

### Analysis Info

Analysis Name D:\Data\fish\data\2023q2(datas)\230626\230626\_amide-C4-OH\_pl\_1-80\_01\_53976.d  
Method tune\_low\_pos\_LCMS\_with lock mass\_220107-3.m  
Sample Name 230626\_amide-C4-OH\_pl  
Comment

Acquisition Date 6/26/2023 10:48:35 AM  
Operator Bruker microTOF-Q II  
Instrument / Ser# micrOTOF-Q 228888.10  
183

### Acquisition Parameter

|             |          |                       |           |                  |           |
|-------------|----------|-----------------------|-----------|------------------|-----------|
| Source Type | ESI      | Ion Polarity          | Positive  | Set Nebulizer    | 2.0 Bar   |
| Focus       | Active   | Set Capillary         | 4500 V    | Set Dry Heater   | 180 °C    |
| Scan Begin  | 50 m/z   | Set End Plate Offset  | -500 V    | Set Dry Gas      | 6.9 l/min |
| Scan End    | 3000 m/z | Set Collision Cell RF | 100.0 Vpp | Set Divert Valve | Waste     |

### +MS, 0.1-0.2min #8-11

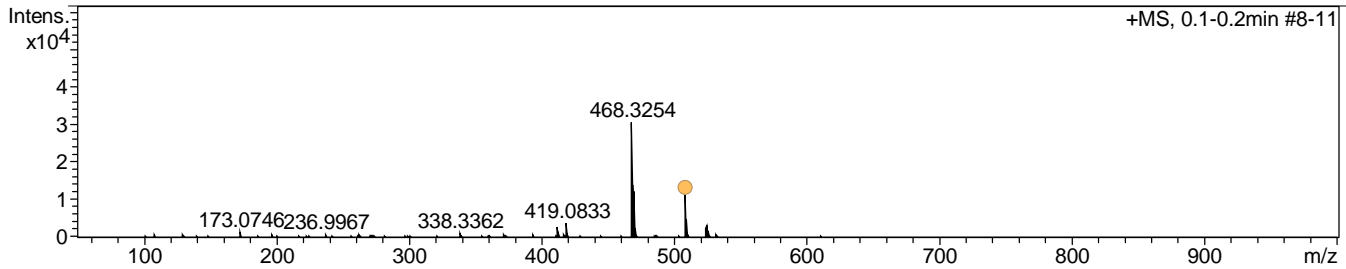

| Meas. m/z | # | Ion Formula | m/z      | err [mDa] | err [ppm] | mSigma | Score  | rdb  | e <sup>-</sup> Conf | N-Rule |
|-----------|---|-------------|----------|-----------|-----------|--------|--------|------|---------------------|--------|
| 508.3167  | 1 | C33H43NNaO2 | 508.3186 | 1.9       | 3.8       | 33.1   | 100.00 | 12.5 | even                | ok     |

### +MS, 0.1-0.2min #8-11

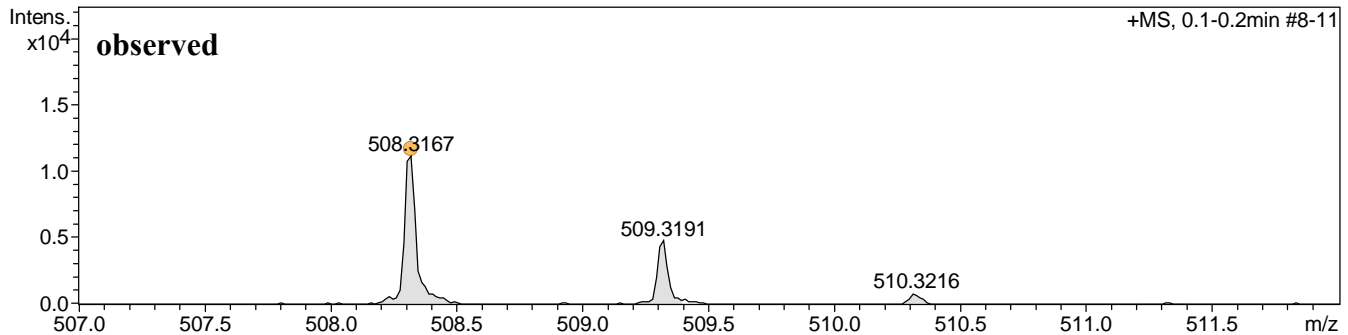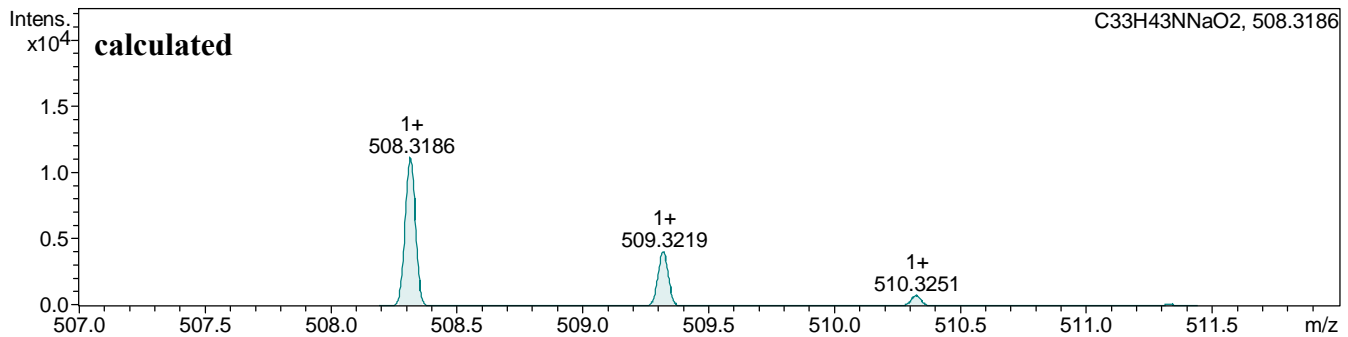

Figure S40  $^1\text{H}$  NMR Spectrum (400 MHz /  $\text{CD}_2\text{Cl}_2$  / 298 K) of **9**

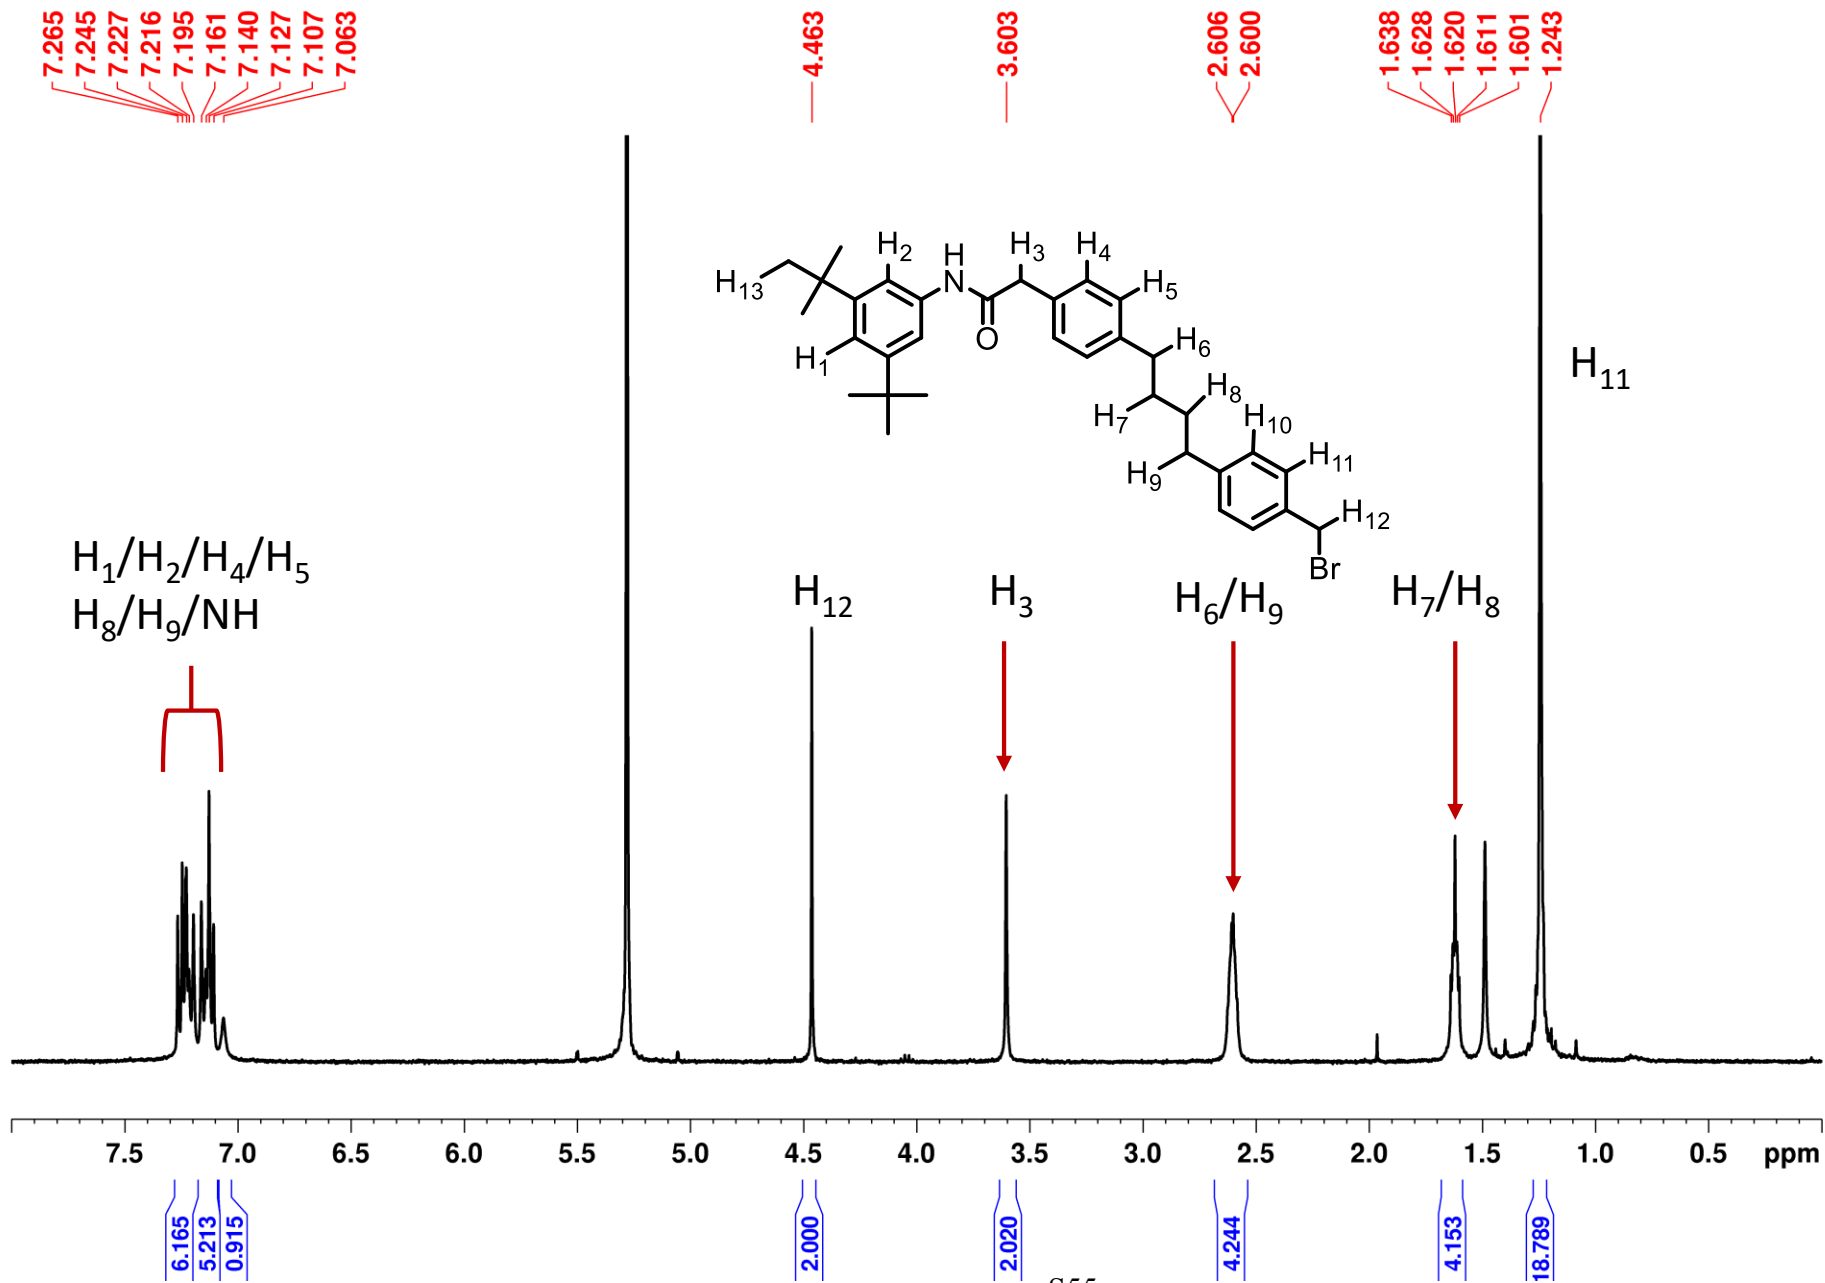

Figure S41  $^{13}\text{C}$  NMR Spectrum (100 MHz /  $\text{CDCl}_3$  / 298 K) of **9**

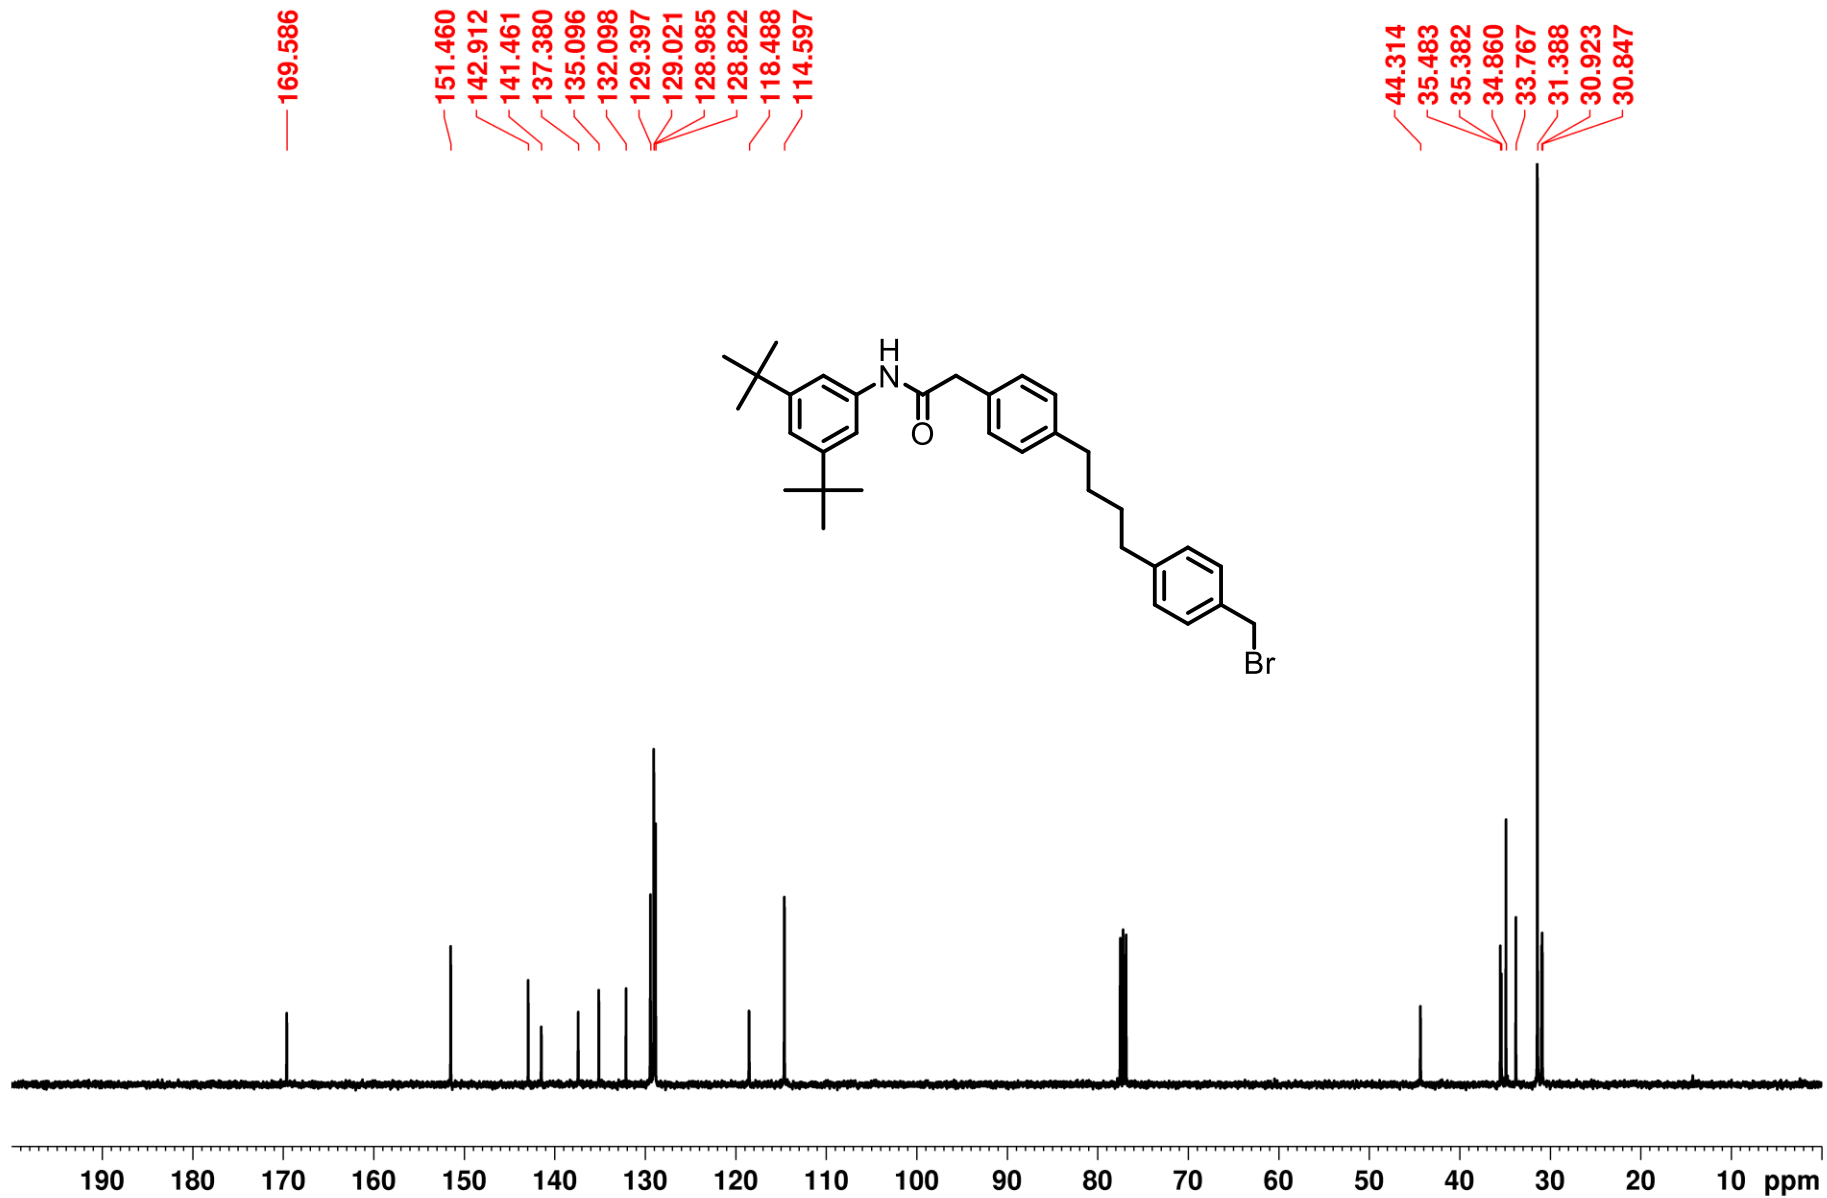



# Figure S42 ESI Mass Spectra of Compound 9

## Mass Spectrum SmartFormula Report

### Analysis Info

Analysis Name D:\Data\fish\data\2023q2(datas)\230626\230626\_amide-C4-Br\_pl\_1-81\_01\_53977.d  
Method tune\_low\_pos\_LCMS\_with lock mass\_220107-3.m  
Sample Name 230626\_amide-C4-Br\_pl  
Comment

Acquisition Date 6/26/2023 10:54:18 AM  
Operator Bruker microTOF-Q II  
Instrument / Ser# micrOTOF-Q 228888.10  
183

### Acquisition Parameter

|             |          |                       |           |                  |           |
|-------------|----------|-----------------------|-----------|------------------|-----------|
| Source Type | ESI      | Ion Polarity          | Positive  | Set Nebulizer    | 2.0 Bar   |
| Focus       | Active   | Set Capillary         | 4500 V    | Set Dry Heater   | 180 °C    |
| Scan Begin  | 50 m/z   | Set End Plate Offset  | -500 V    | Set Dry Gas      | 6.9 l/min |
| Scan End    | 3000 m/z | Set Collision Cell RF | 100.0 Vpp | Set Divert Valve | Waste     |

### +MS, 0.1-0.2min #7-10

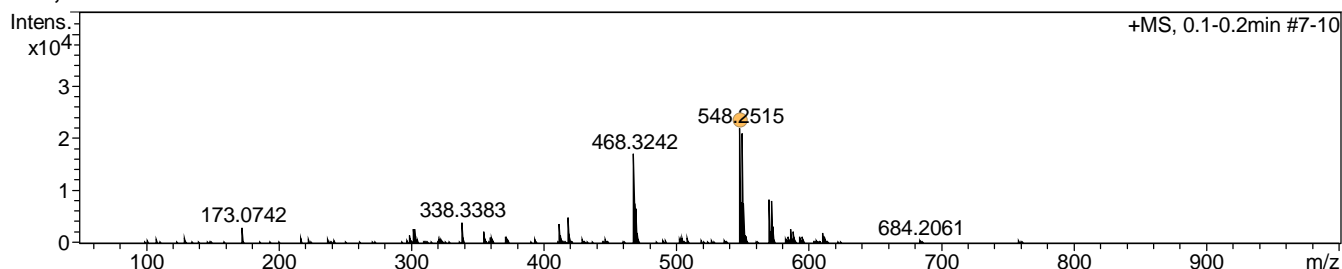

| Meas. m/z | # | Ion Formula | m/z      | err [mDa] | err [ppm] | mSigma | Score  | rdb  | e <sup>-</sup> | Conf | N-Rule |
|-----------|---|-------------|----------|-----------|-----------|--------|--------|------|----------------|------|--------|
| 548.2515  | 1 | C33H43BrNO  | 548.2523 | -0.8      | -1.4      | 25.8   | 100.00 | 12.5 | even           |      | ok     |

### +MS, 0.1-0.2min #7-10

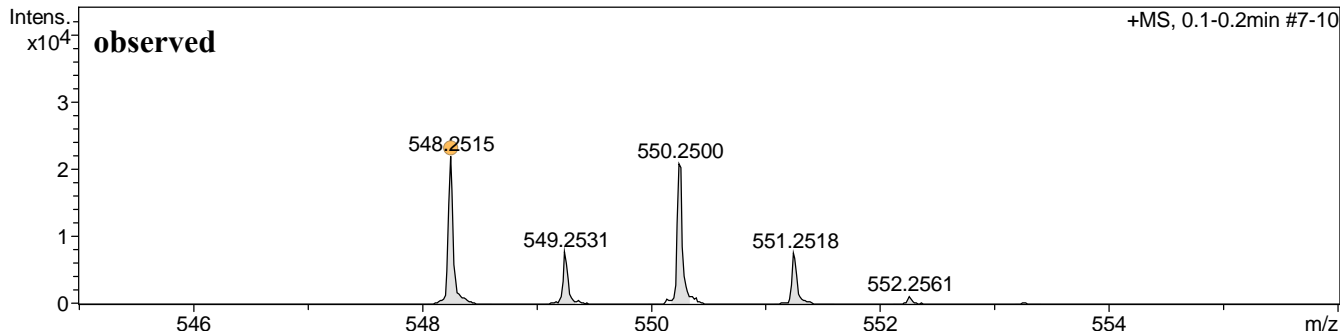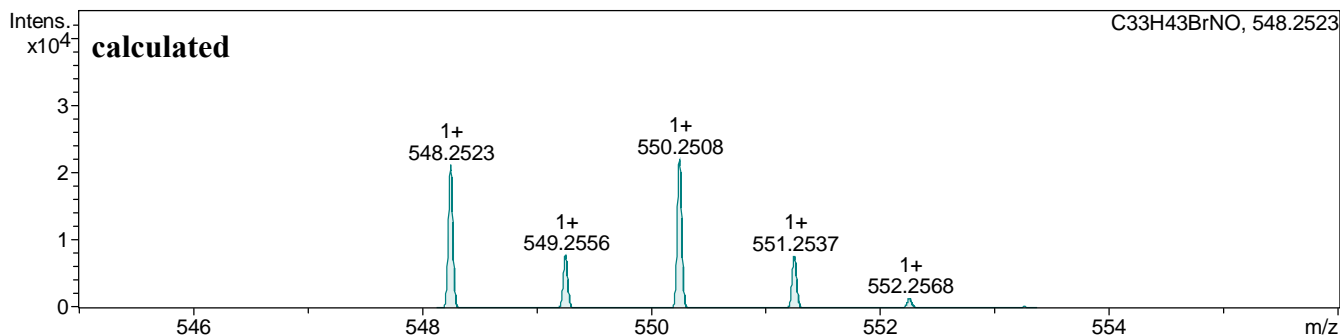

Figure S43  $^1\text{H}$  NMR Spectrum (400 MHz /  $\text{CD}_2\text{Cl}_2$  / 298 K) of  $10 \cdot \text{TFPB}$

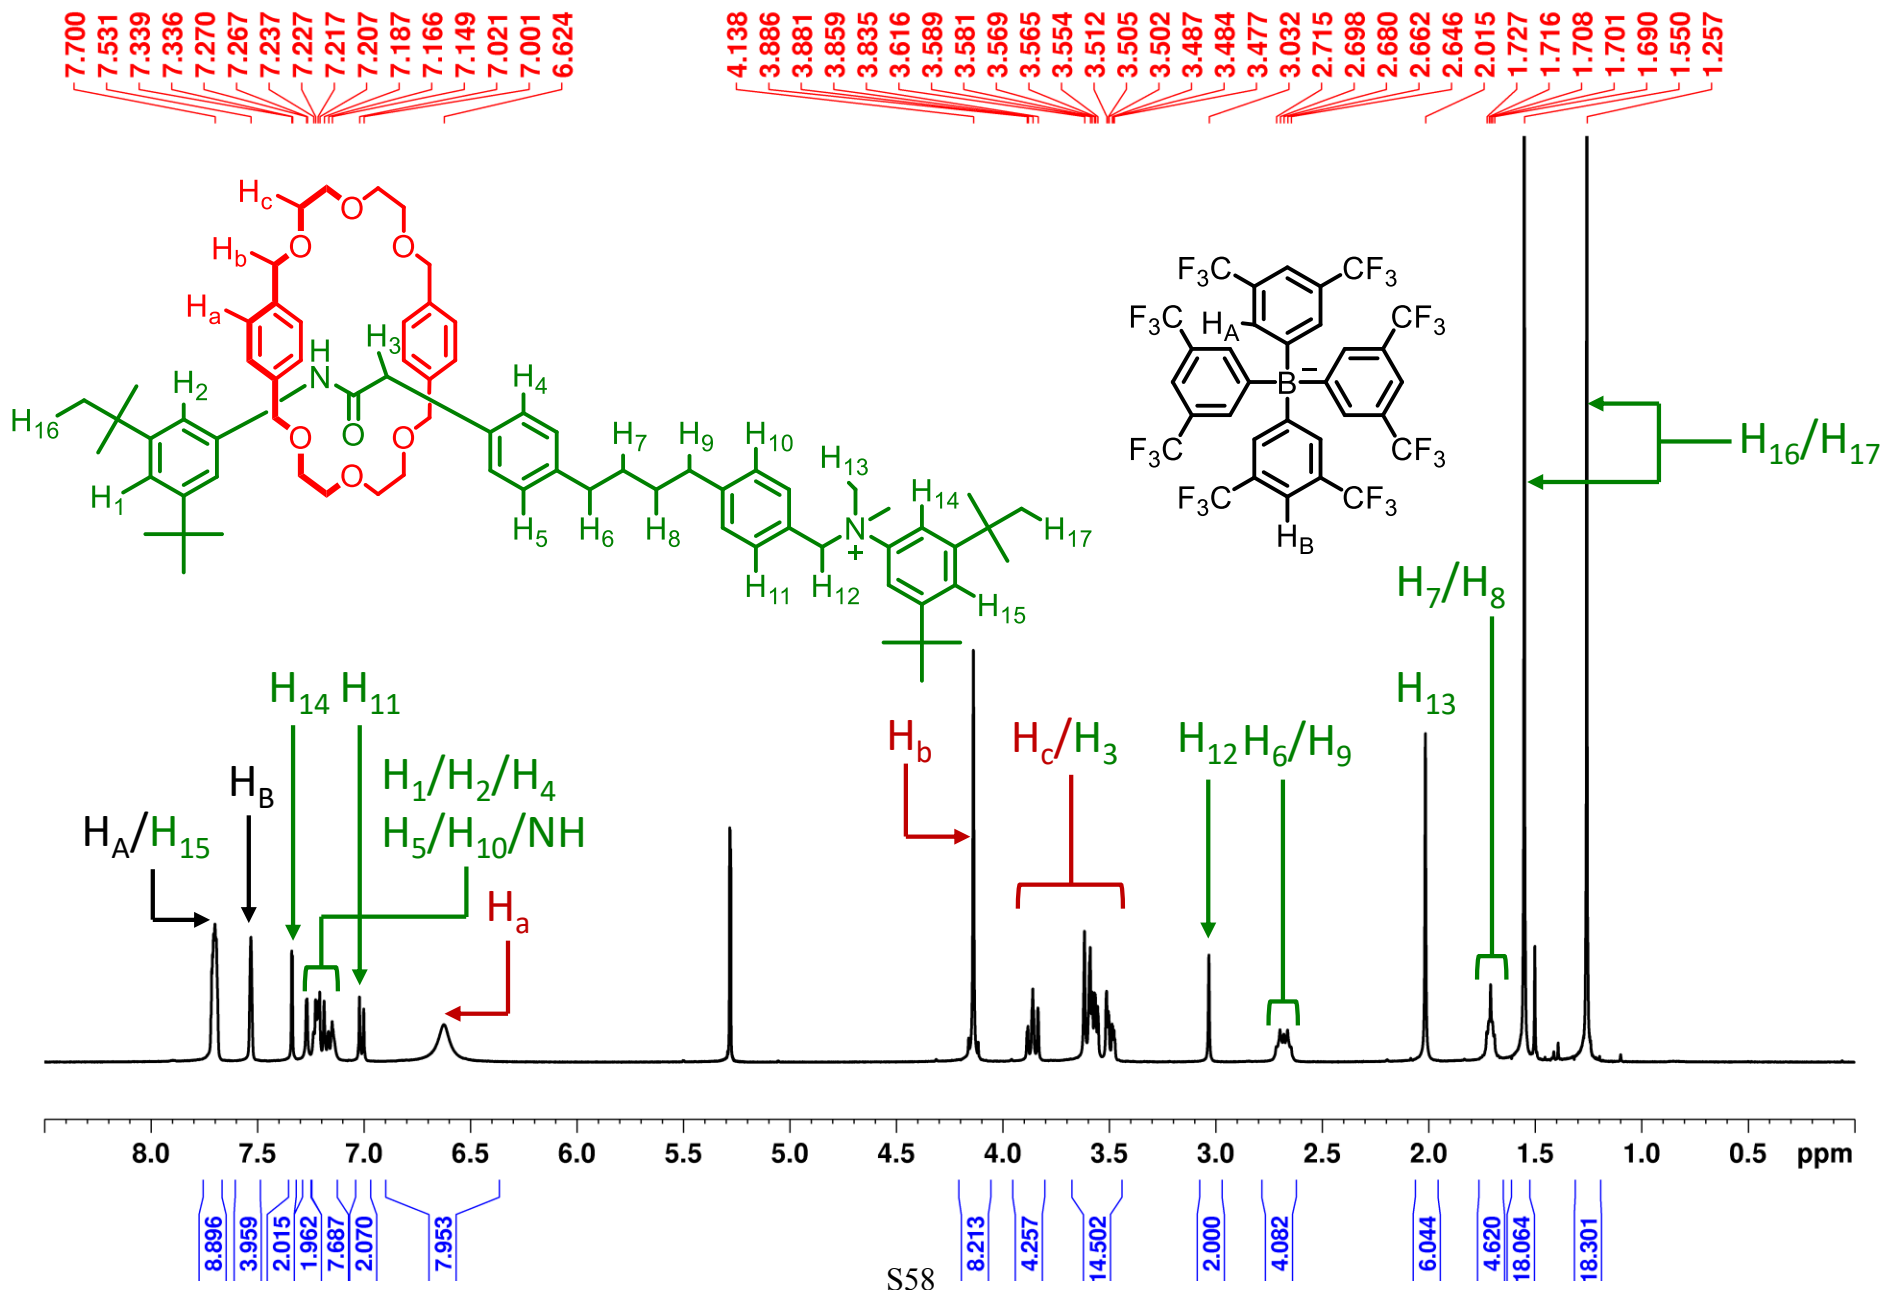

Figure S44  $^{13}\text{C}$  NMR Spectrum (100 MHz /  $\text{CDCl}_3$  / 298 K) of  $10 \cdot \text{TFPB}$

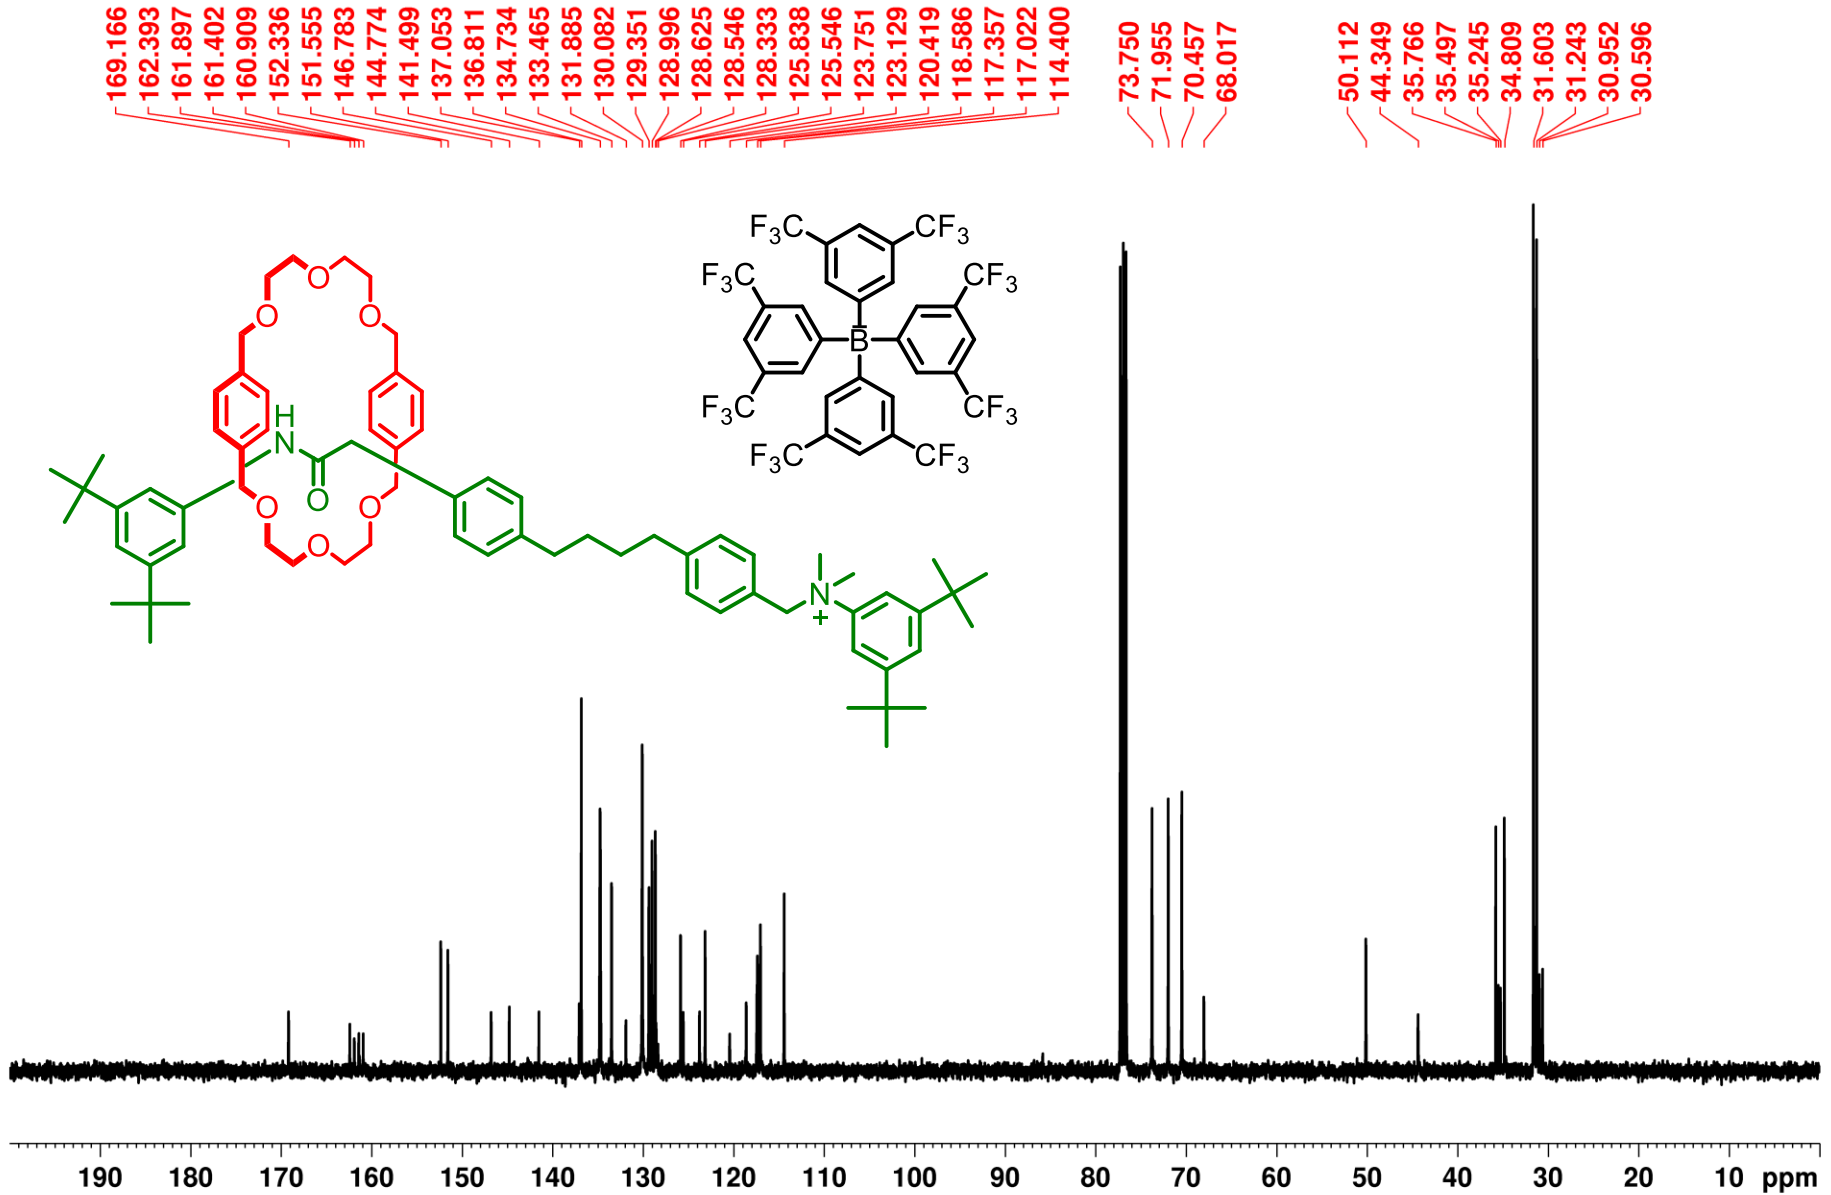

# Figure S45 ESI Mass Spectra of Compound 10•TFPB

## Mass Spectrum SmartFormula Report

### Analysis Info

Analysis Name D:\Data\fish\data\2023q2(datas)\230516\230516\_amide-C4-rotaxane\_pw\_1-36\_01\_53378.d  
Method tune\_wide\_pos\_LCMS\_with lock mass\_220107-3.m  
Sample Name 230516\_amide-C4-rotaxane\_pw  
Comment

Acquisition Date 5/16/2023 3:19:46 PM  
Operator Bruker microTOF-Q II  
Instrument / Ser# micrOTOF-Q 228888.10  
183

### Acquisition Parameter

|             |          |                       |           |                  |           |
|-------------|----------|-----------------------|-----------|------------------|-----------|
| Source Type | ESI      | Ion Polarity          | Positive  | Set Nebulizer    | 2.0 Bar   |
| Focus       | Active   | Set Capillary         | 4500 V    | Set Dry Heater   | 180 °C    |
| Scan Begin  | 50 m/z   | Set End Plate Offset  | -500 V    | Set Dry Gas      | 6.9 l/min |
| Scan End    | 3000 m/z | Set Collision Cell RF | 500.0 Vpp | Set Divert Valve | Waste     |

### +MS, 0.2min #13

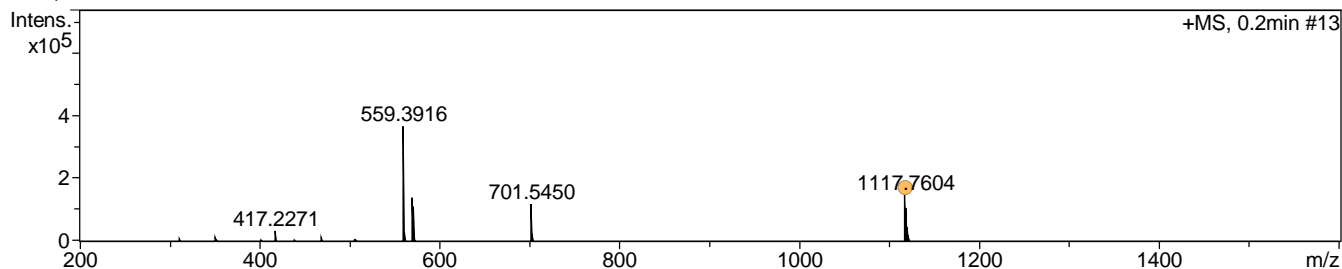

| Meas. m/z | # | Ion Formula | m/z       | err [mDa] | err [ppm] | mSigma | Score  | rdb  | e <sup>-</sup> Conf | N-Rule |
|-----------|---|-------------|-----------|-----------|-----------|--------|--------|------|---------------------|--------|
| 1117.7604 | 1 | C73H101N2O7 | 1117.7603 | 0.0       | 0.0       | 28.9   | 100.00 | 24.5 | even                | ok     |

### +MS, 0.2min #13

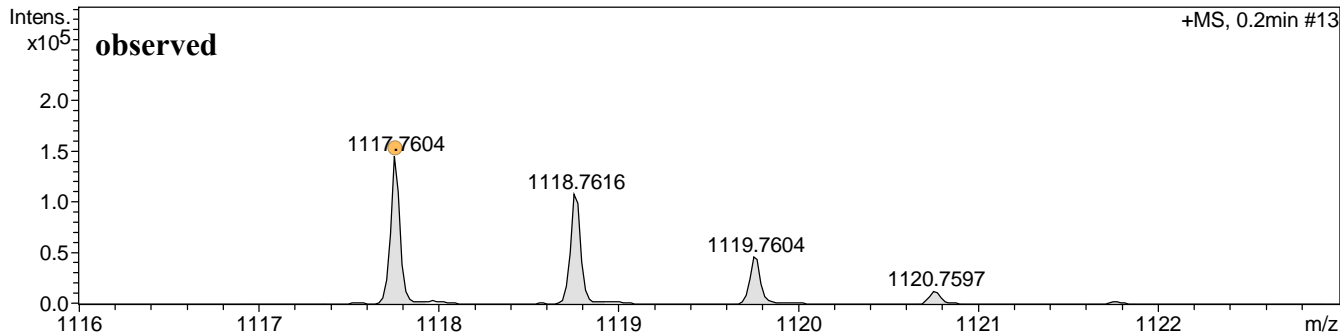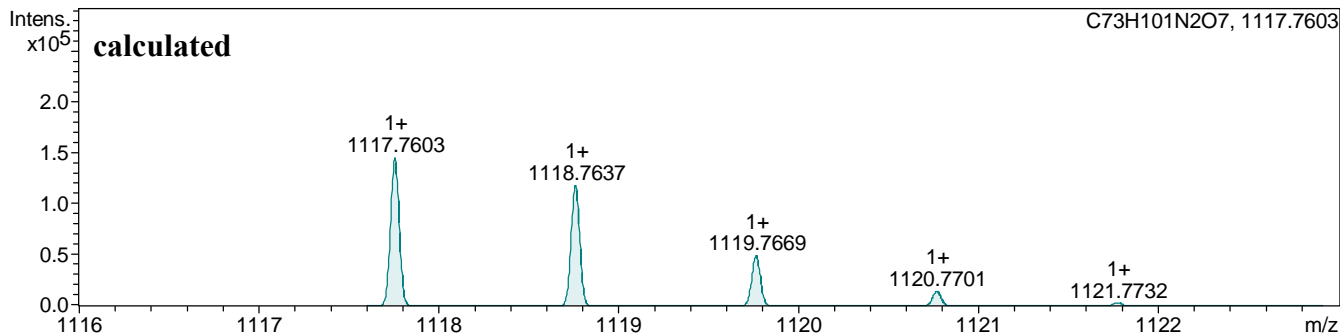

Figure S46  $^1\text{H}$  NMR Spectrum (400 MHz /  $\text{CD}_2\text{Cl}_2$  / 298 K) of **11**

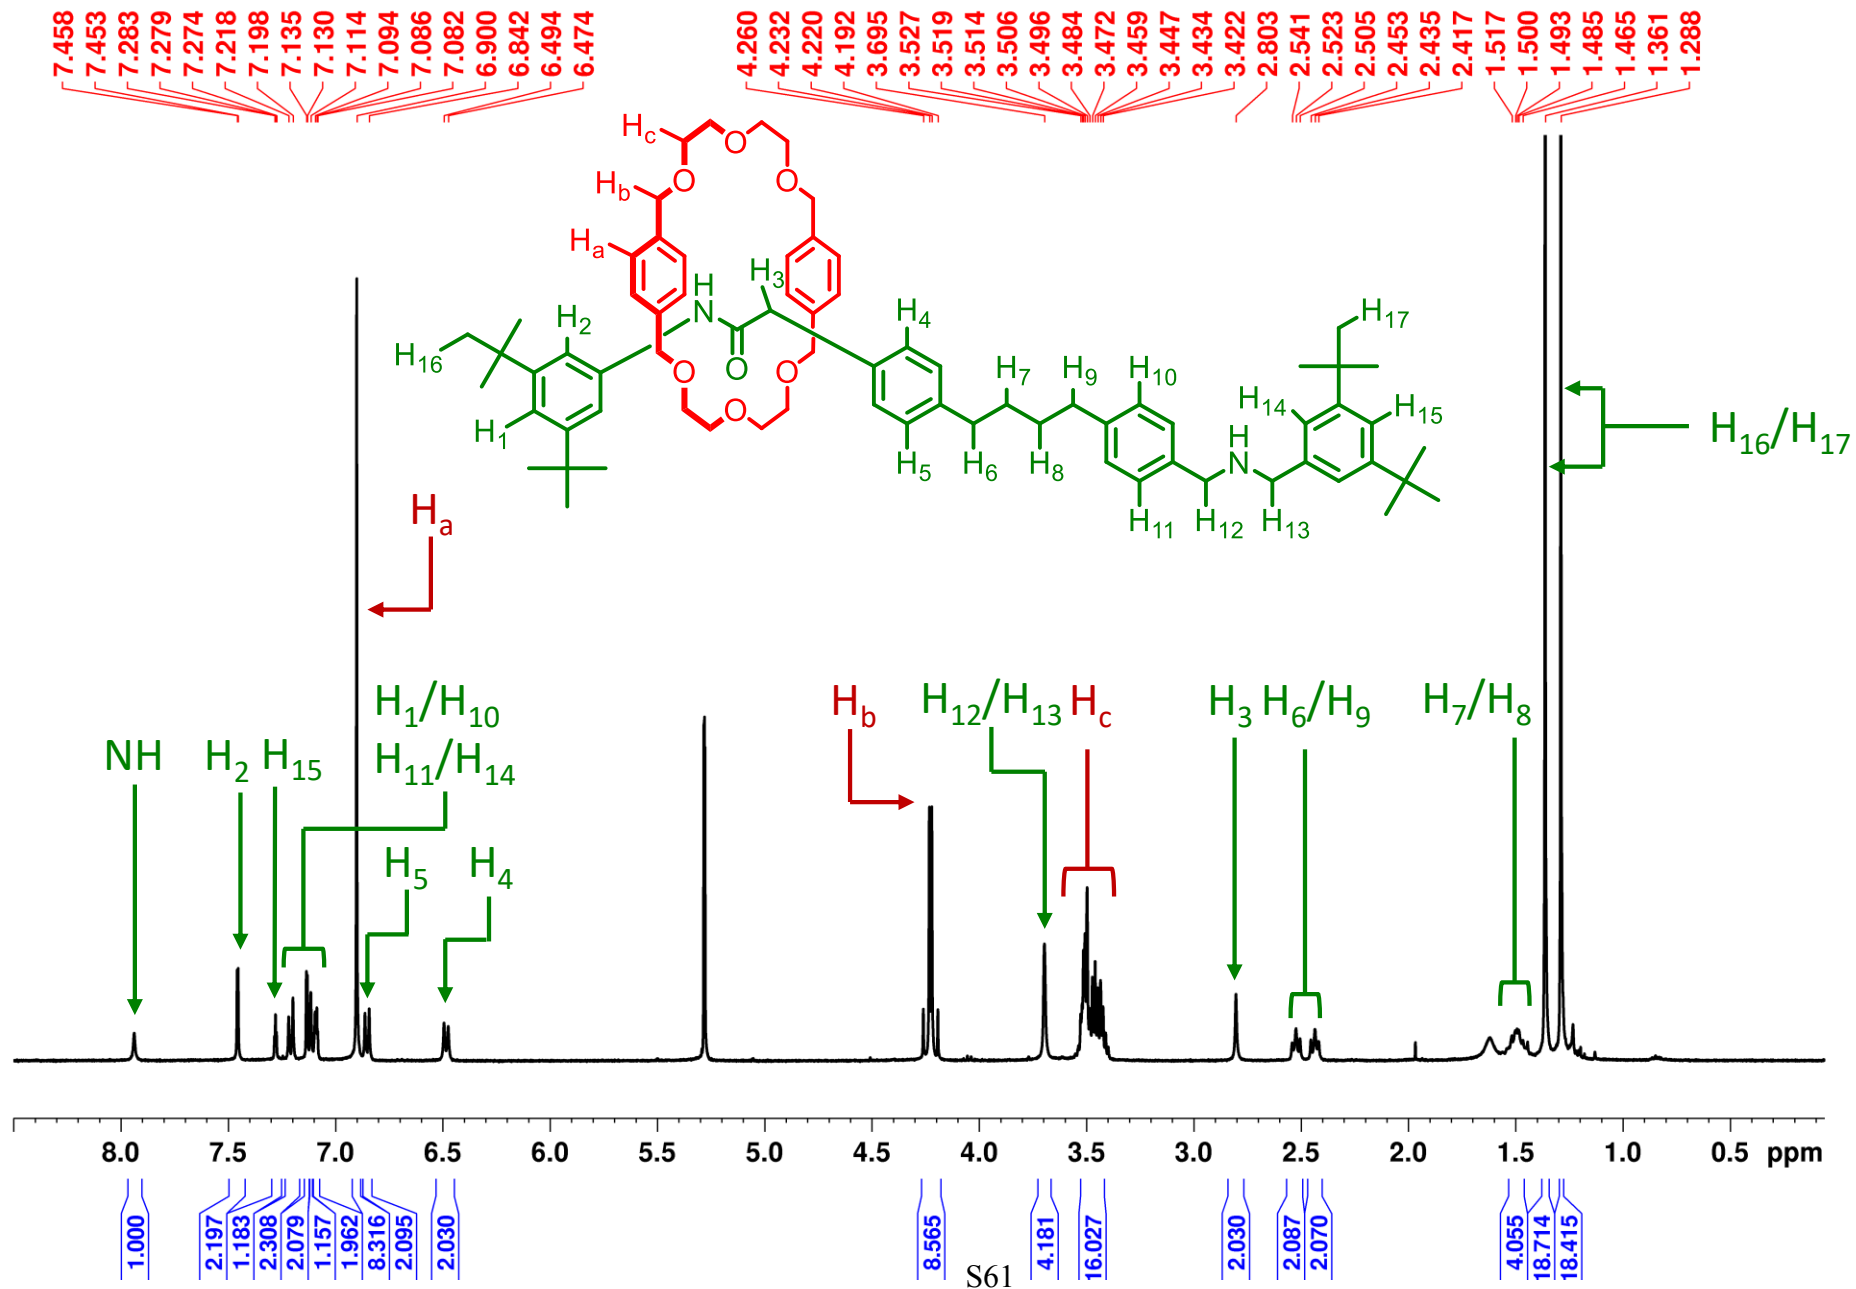

Figure S47  $^{13}\text{C}$  NMR Spectrum (100 MHz /  $\text{CD}_2\text{Cl}_2$  / 298 K) of **11**

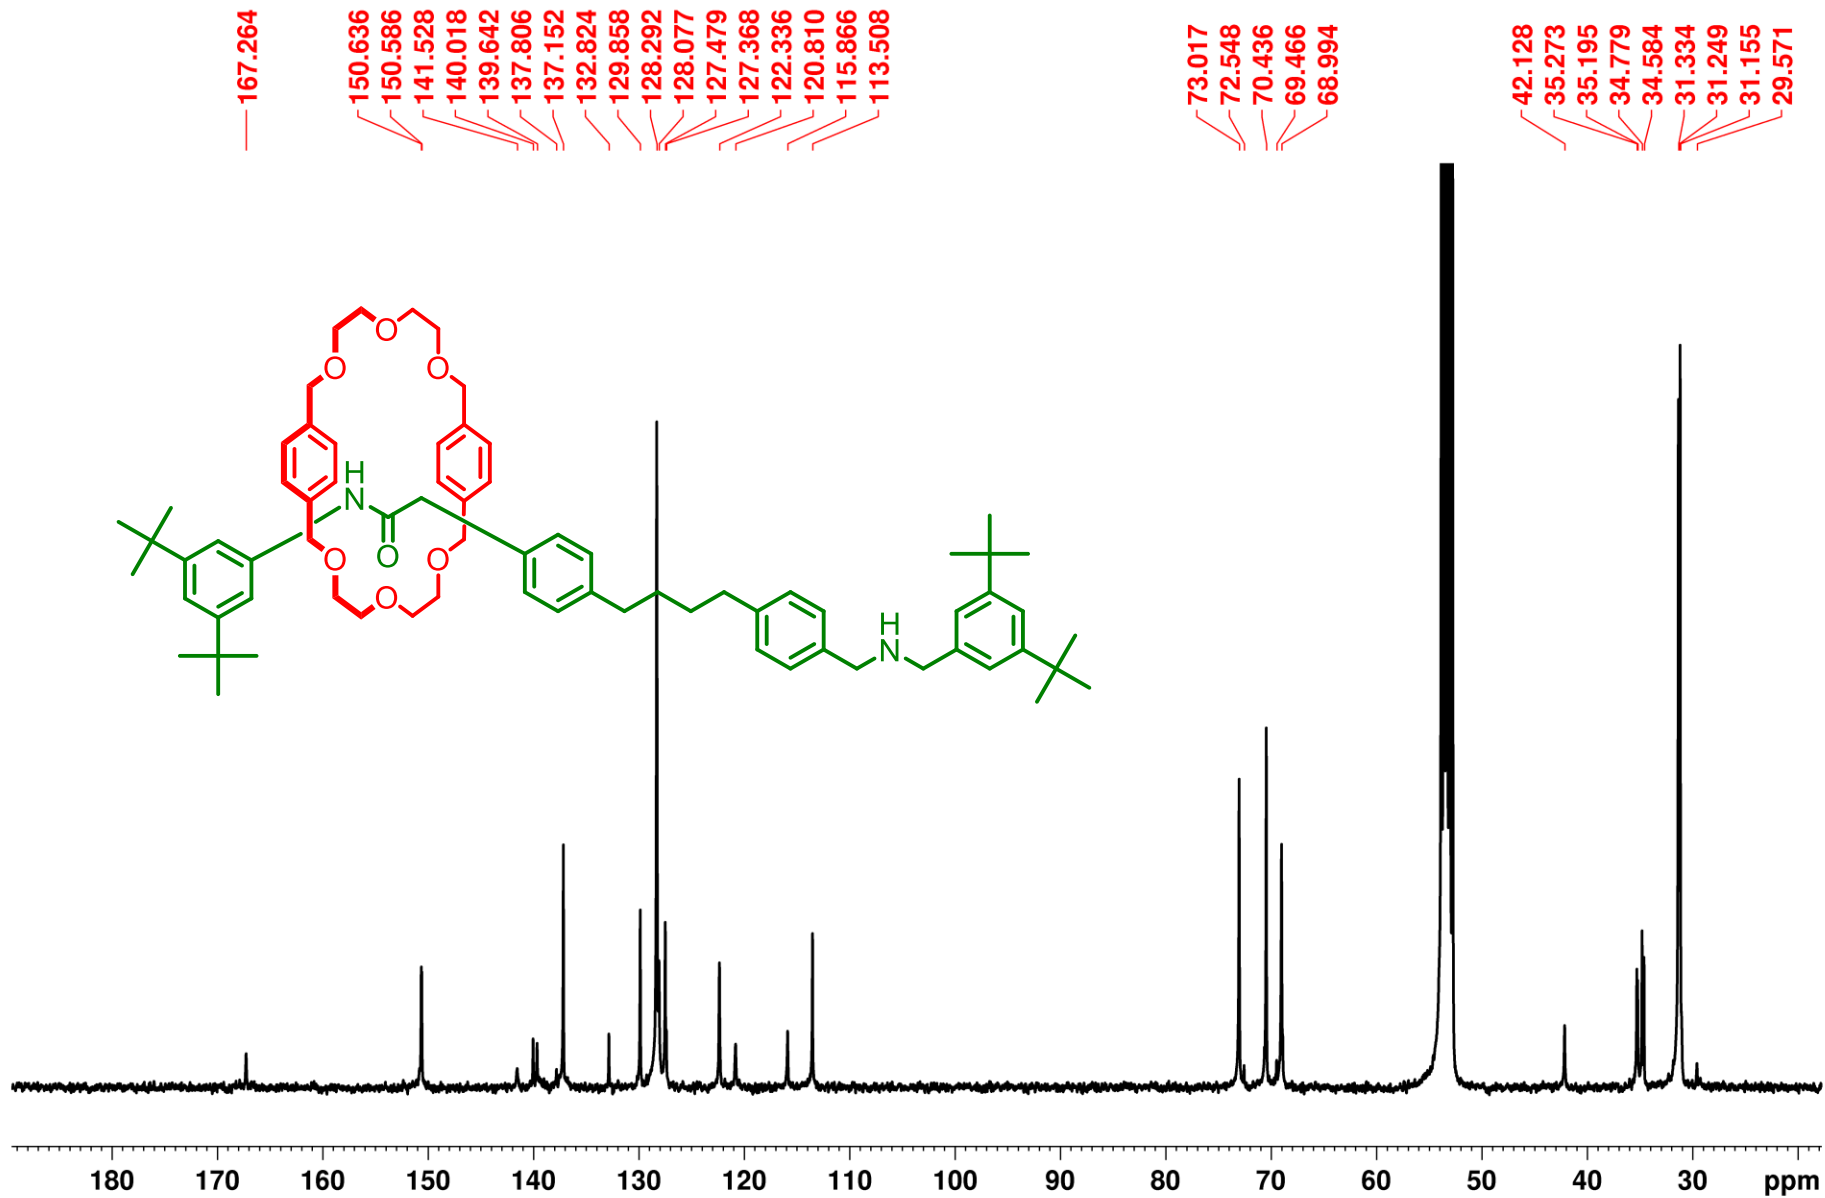

# Figure S48 ESI Mass Spectra of Compound 11

## Mass Spectrum SmartFormula Report

### Analysis Info

Analysis Name D:\Data\Fish\Data\2023Q3(datas)\230721\230721\_amide-C4-rot-amine\_pw\_1-60\_01\_54412.d  
Method tune\_wide\_pos\_LCMS\_with lock mass\_220107-3.m  
Sample Name 230721\_amide-C4-rot-amine\_pw  
Comment

Acquisition Date 7/21/2023 11:57:27 AM  
Operator Bruker microTOF-Q II  
Instrument / Ser# micrOTOF-Q 228888.10  
183

### Acquisition Parameter

|             |          |                       |           |                  |           |
|-------------|----------|-----------------------|-----------|------------------|-----------|
| Source Type | ESI      | Ion Polarity          | Positive  | Set Nebulizer    | 2.0 Bar   |
| Focus       | Active   | Set Capillary         | 4500 V    | Set Dry Heater   | 180 °C    |
| Scan Begin  | 50 m/z   | Set End Plate Offset  | -500 V    | Set Dry Gas      | 6.9 l/min |
| Scan End    | 3000 m/z | Set Collision Cell RF | 500.0 Vpp | Set Divert Valve | Waste     |

### +MS, 0.1min #5

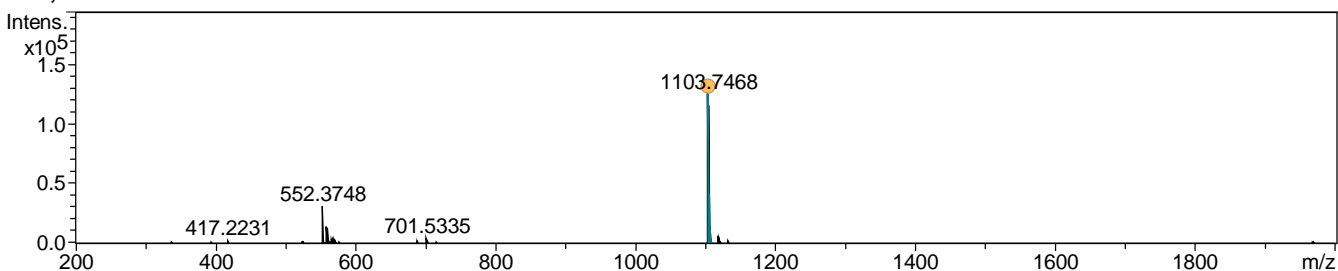

| Meas. m/z | # | Ion Formula | m/z       | err [mDa] | err [ppm] | mSigma | Score  | rdb  | e <sup>-</sup> | Conf | N-Rule |
|-----------|---|-------------|-----------|-----------|-----------|--------|--------|------|----------------|------|--------|
| 1103.7468 | 1 | C72H99N2O7  | 1103.7447 | -2.1      | -1.9      | 69.8   | 100.00 | 24.5 | even           |      | ok     |

### +MS, 0.1min #5

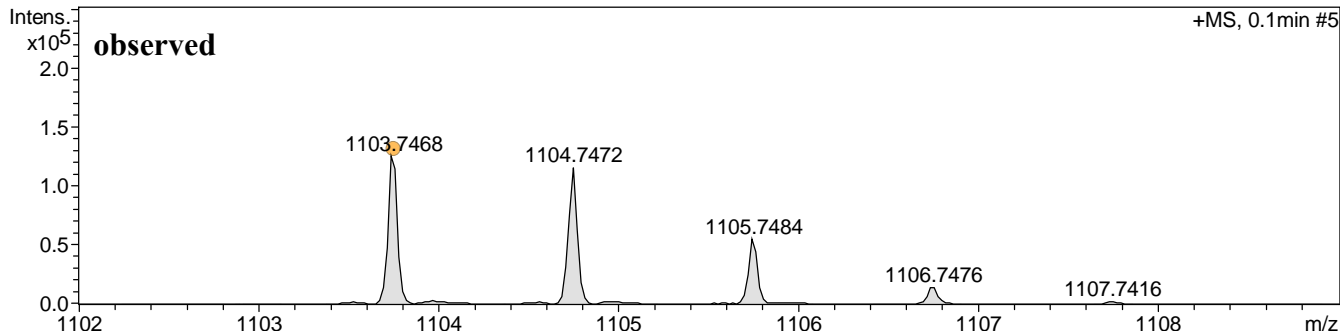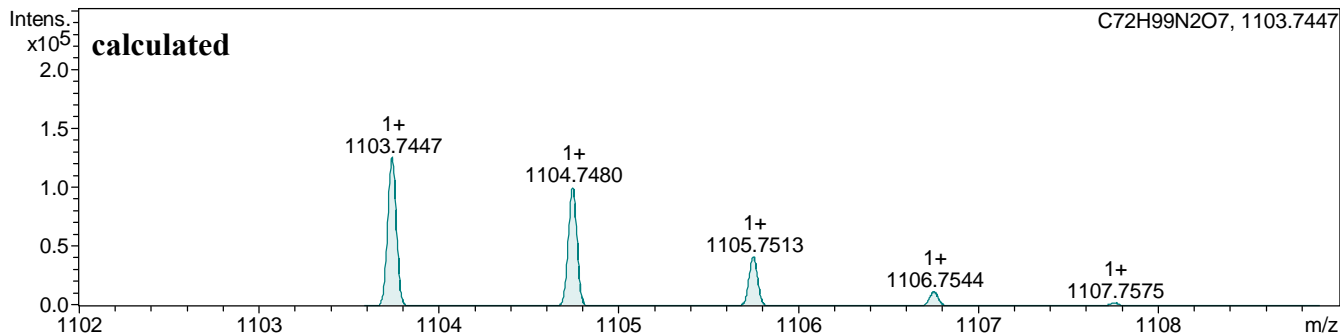

Figure S49  $^1\text{H}$  NMR Spectrum (400 MHz /  $\text{CDCl}_3$  / 298 K) of **12**

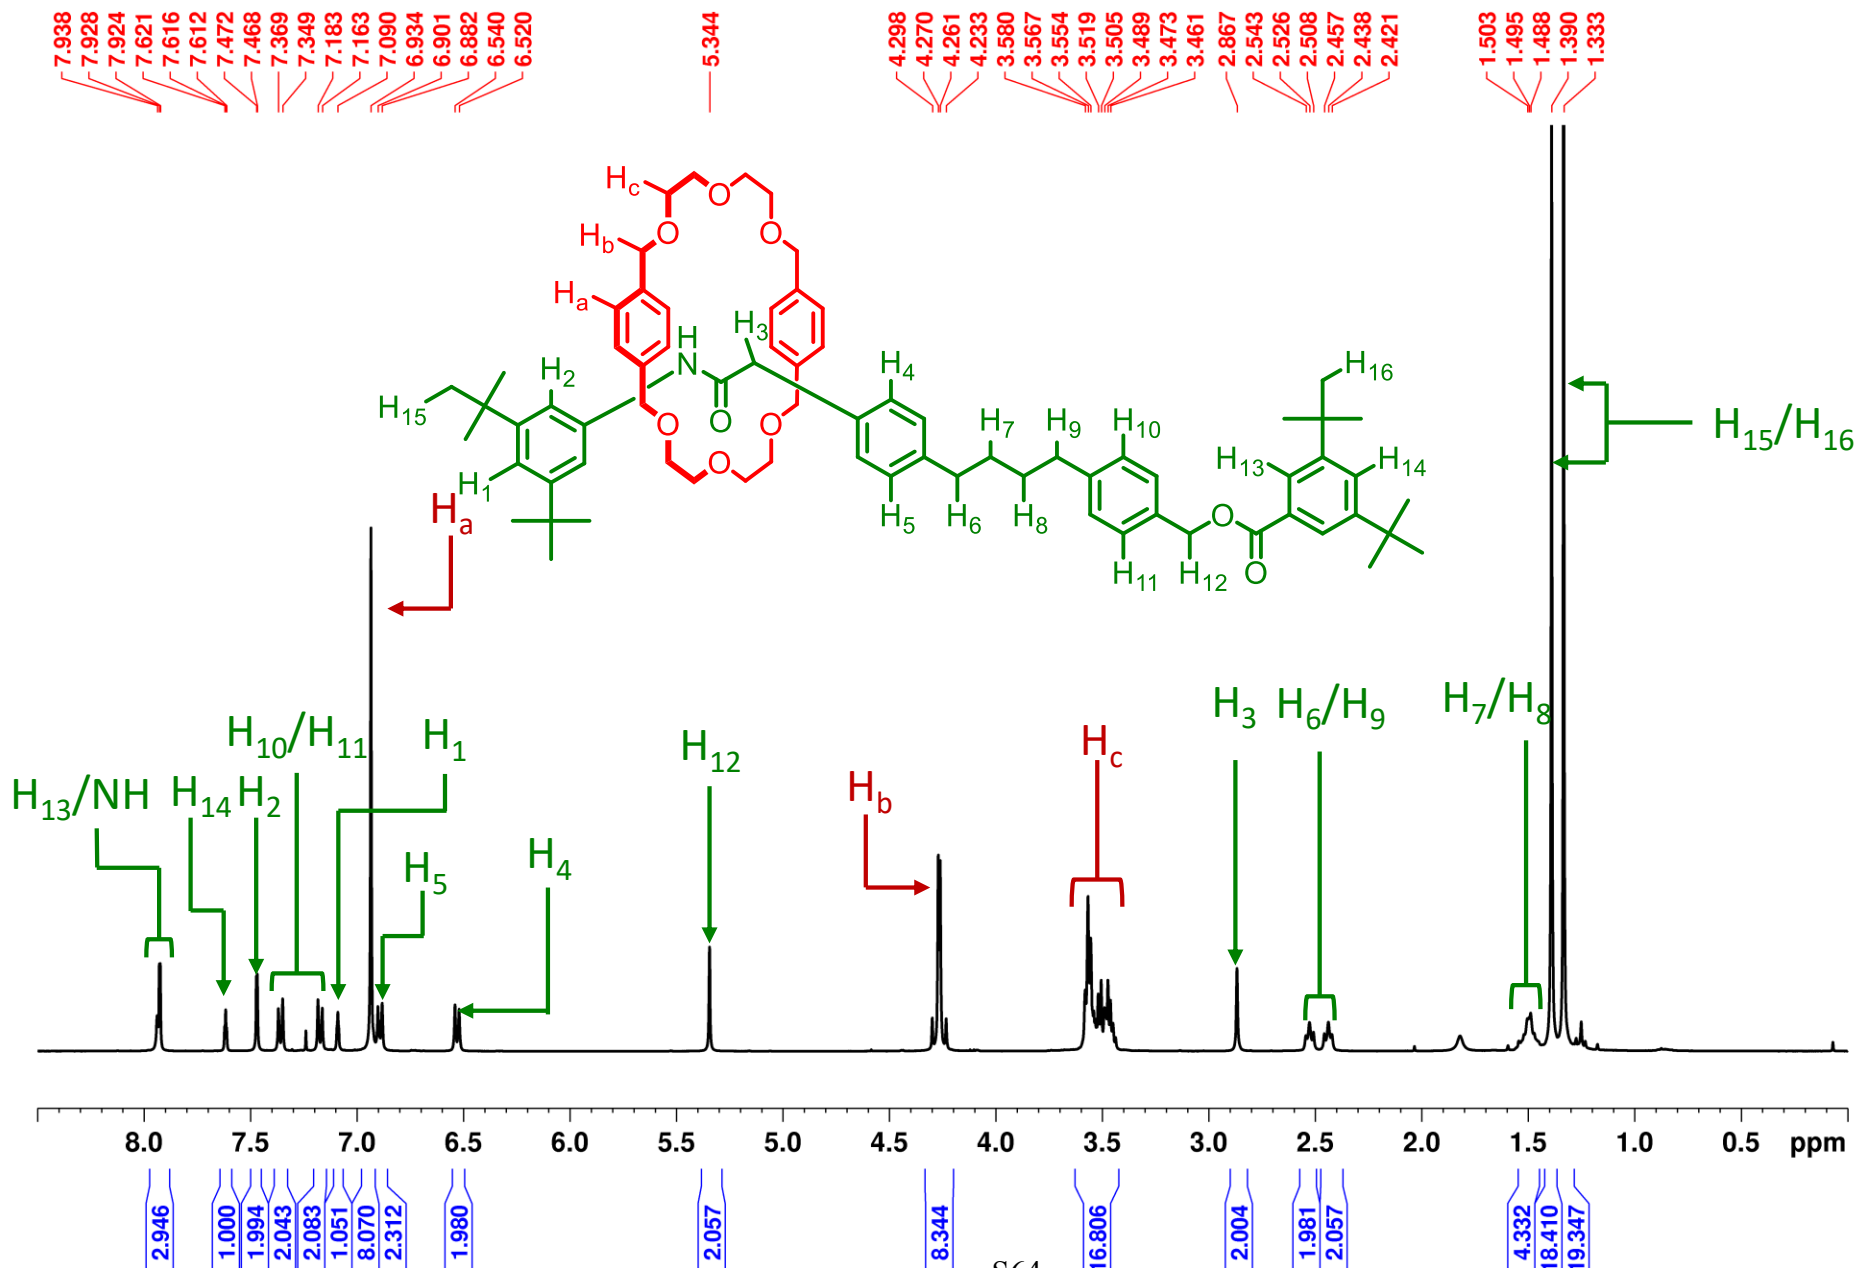



Figure S50  $^{13}\text{C}$  NMR Spectrum (100 MHz /  $\text{CDCl}_3$  / 298 K) of **12**

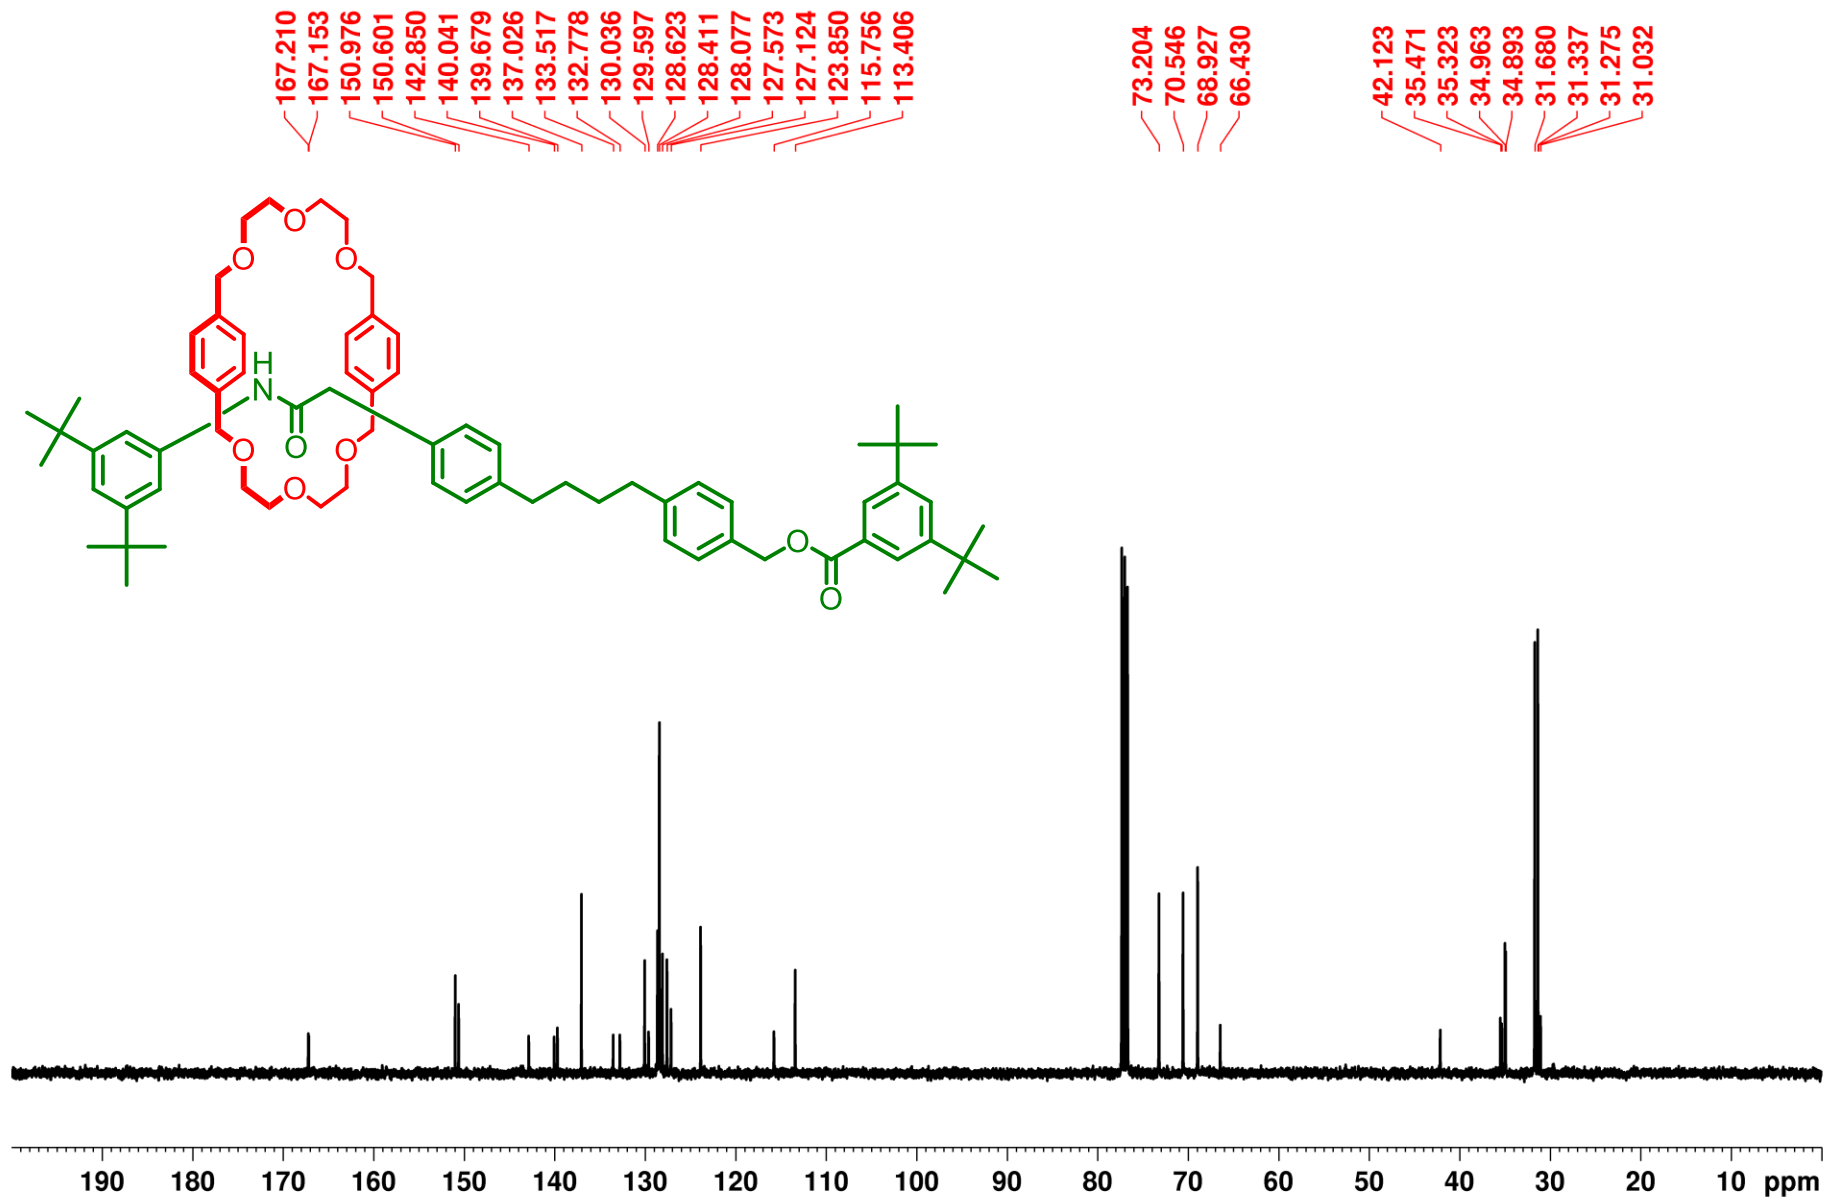

# Figure S51 ESI Mass Spectra of Compound 12

## Mass Spectrum SmartFormula Report

### Analysis Info

Analysis Name D:\Data\MS core facility\microTOF QII\Raw data\230711\230711\_amide-C4-rot-acid\_pw\_1-89\_01\_54202.d  
Method tune\_wide\_pos\_LCMS\_with lock mass\_220107-3.m  
Sample Name 230711\_amide-C4-rot-acid\_pw  
Comment

Acquisition Date 7/11/2023 1:00:20 PM

Operator Bruker microTOF-Q II

Instrument / Ser# microTOF-Q 10183

### Acquisition Parameter

|             |          |                       |           |                  |           |
|-------------|----------|-----------------------|-----------|------------------|-----------|
| Source Type | ESI      | Ion Polarity          | Positive  | Set Nebulizer    | 2.0 Bar   |
| Focus       | Active   | Set Capillary         | 4500 V    | Set Dry Heater   | 180 °C    |
| Scan Begin  | 50 m/z   | Set End Plate Offset  | -500 V    | Set Dry Gas      | 6.9 l/min |
| Scan End    | 3000 m/z | Set Collision Cell RF | 500.0 Vpp | Set Divert Valve | Waste     |

### +MS, 0.4-0.4min #(23-25)

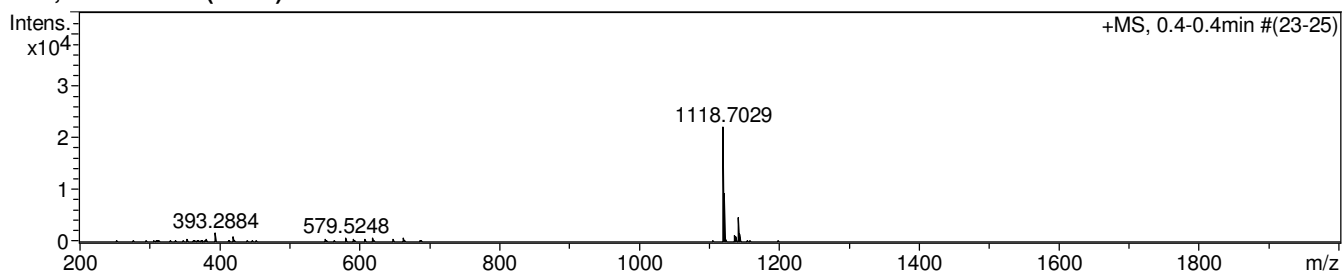

| Meas. m/z | # | Formula         | Score  | m/z       | err [mDa] | err [ppm] | mSigma | rdb  | e <sup>-</sup> Conf | N-Rule |
|-----------|---|-----------------|--------|-----------|-----------|-----------|--------|------|---------------------|--------|
| 1118.7029 | 1 | C 72 H 96 N O 9 | 100.00 | 1118.7080 | 5.0       | 4.5       | 49.4   | 25.5 | even                | ok     |

### +MS, 0.4-0.4min #(23-25)

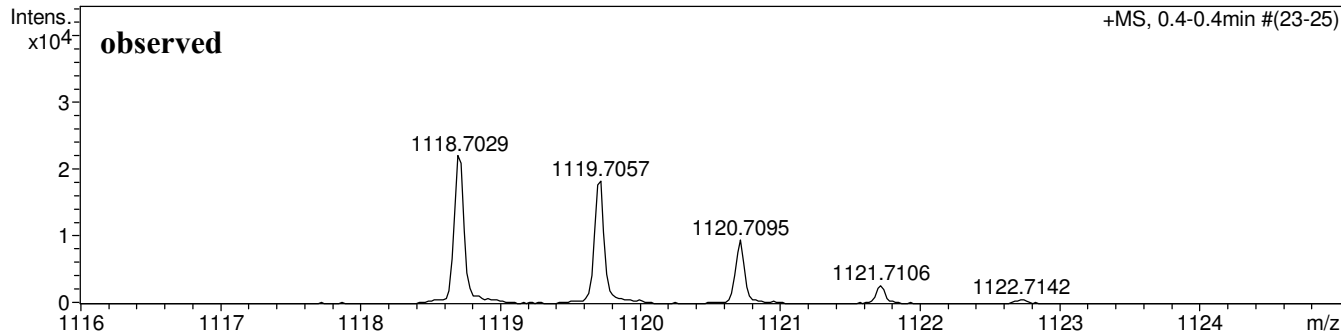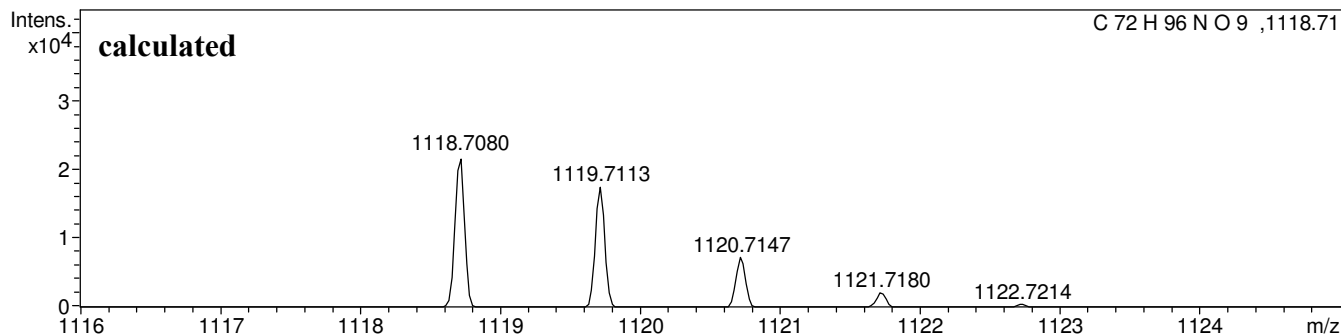

Figure S52  $^1\text{H}$  NMR Spectrum (400 MHz /  $\text{CDCl}_3$  / 298 K) of **13**

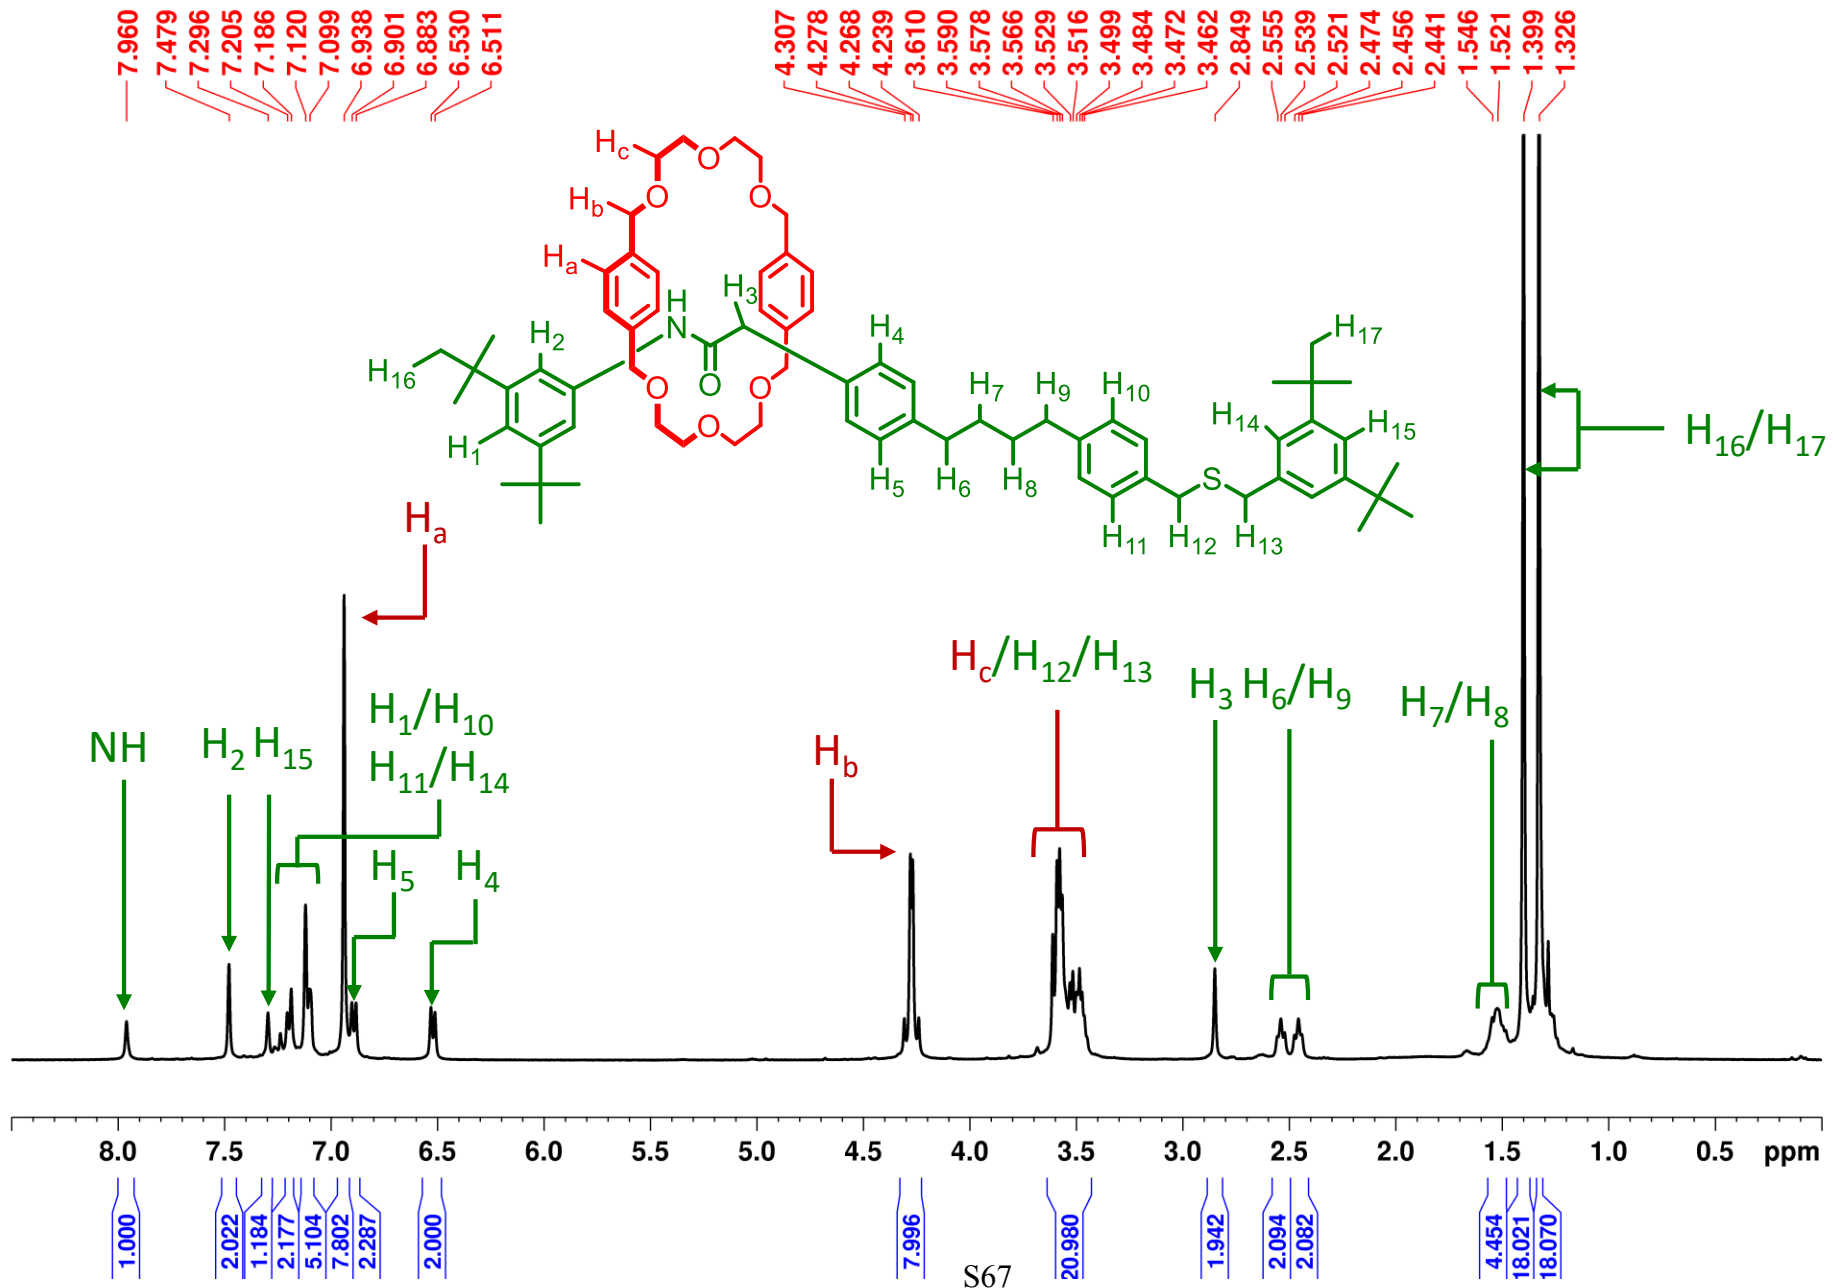

Figure S53  $^{13}\text{C}$  NMR Spectrum (100 MHz /  $\text{CDCl}_3$  / 298 K) of **13**

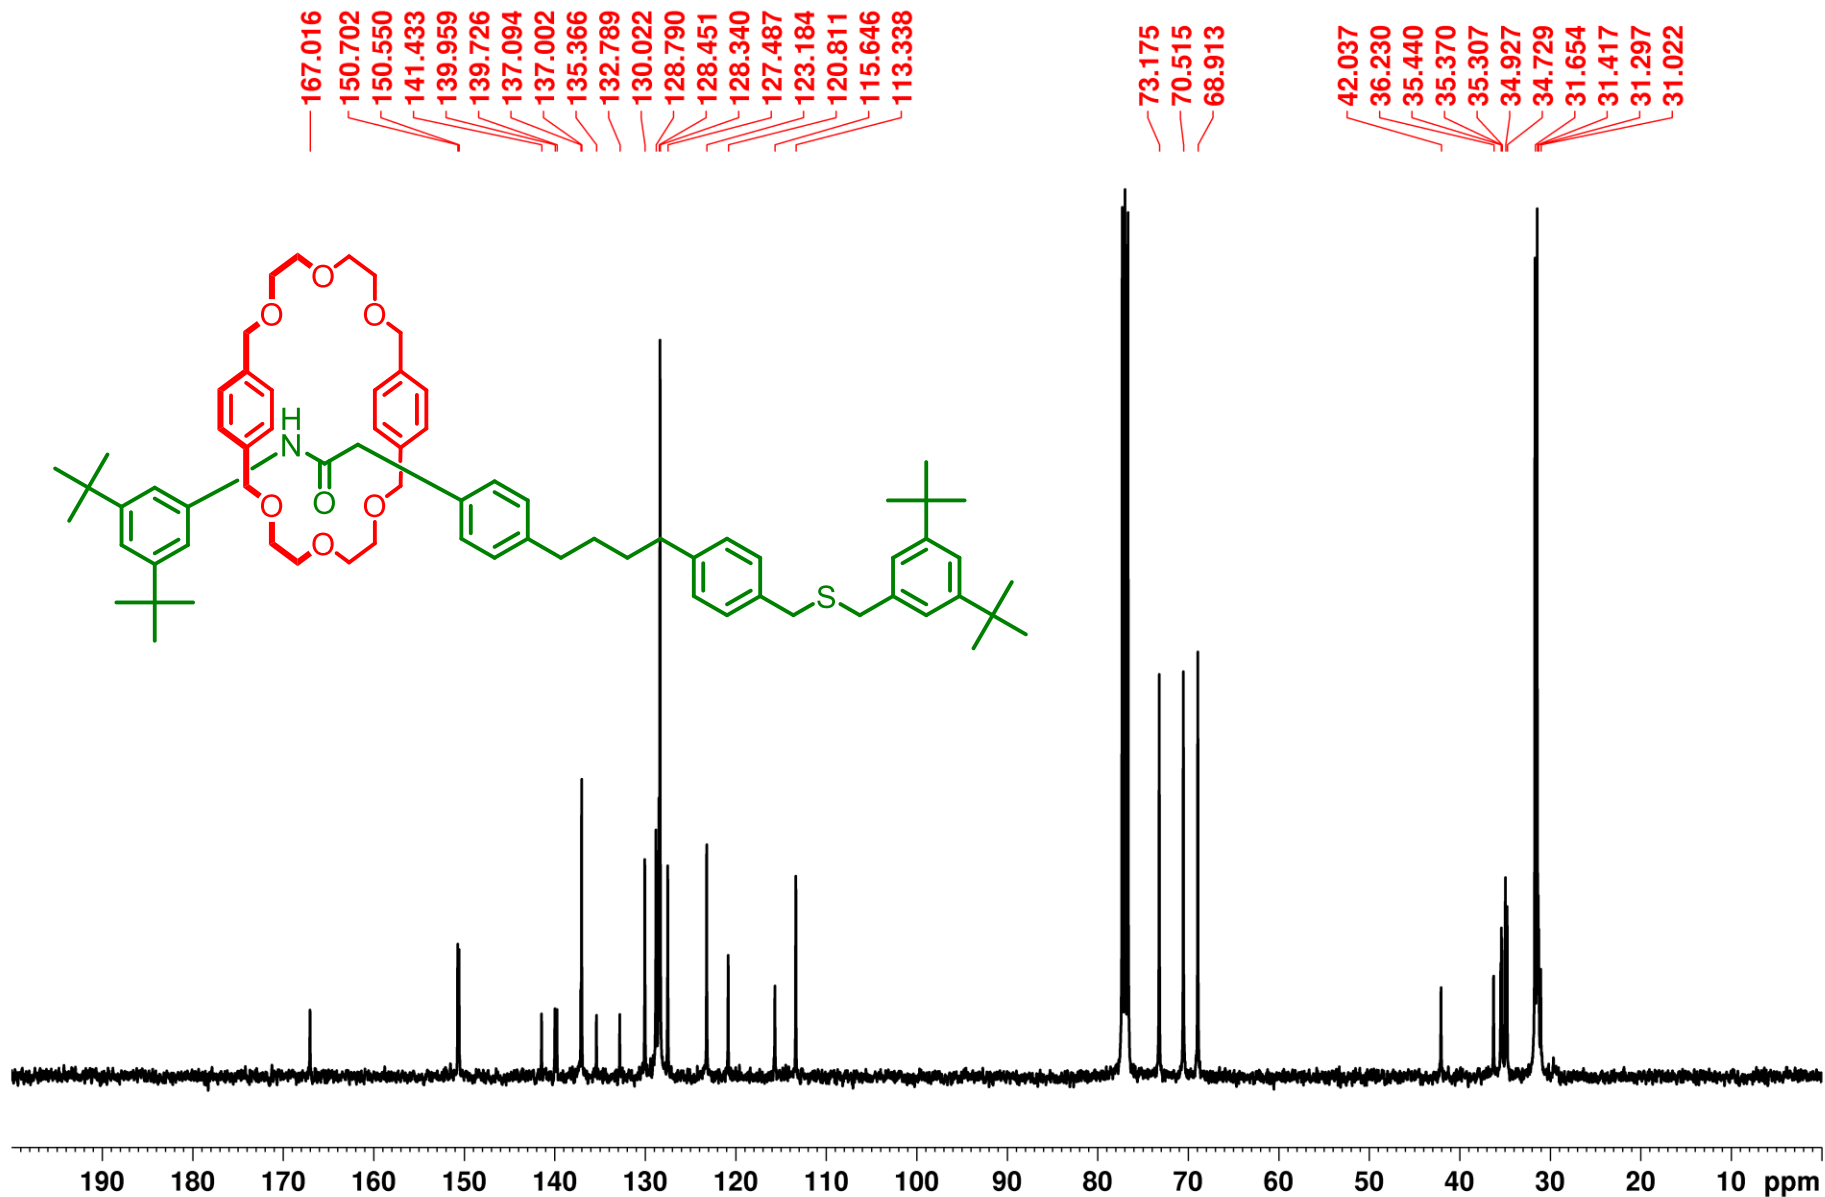

# Figure S54 ESI Mass Spectra of Compound 13

## Mass Spectrum SmartFormula Report

### Analysis Info

Analysis Name D:\Data\Fish\Data\2023Q3(datas)\230721\230721\_amide-Ca-rot-thiol\_pw\_1-58\_01\_54410.d  
Method tune\_wide\_pos\_LCMS\_with lock mass\_220107-3.m  
Sample Name 230721\_amide-Ca-rot-thiol\_pw  
Comment

Acquisition Date 7/21/2023 11:45:59 AM  
Operator Bruker microTOF-Q II  
Instrument / Ser# micrOTOF-Q 228888.10  
183

### Acquisition Parameter

|             |          |                       |           |                  |           |
|-------------|----------|-----------------------|-----------|------------------|-----------|
| Source Type | ESI      | Ion Polarity          | Positive  | Set Nebulizer    | 2.0 Bar   |
| Focus       | Active   | Set Capillary         | 4500 V    | Set Dry Heater   | 180 °C    |
| Scan Begin  | 50 m/z   | Set End Plate Offset  | -500 V    | Set Dry Gas      | 6.9 l/min |
| Scan End    | 3000 m/z | Set Collision Cell RF | 500.0 Vpp | Set Divert Valve | Waste     |

### +MS, 0.6-0.7min #35-41

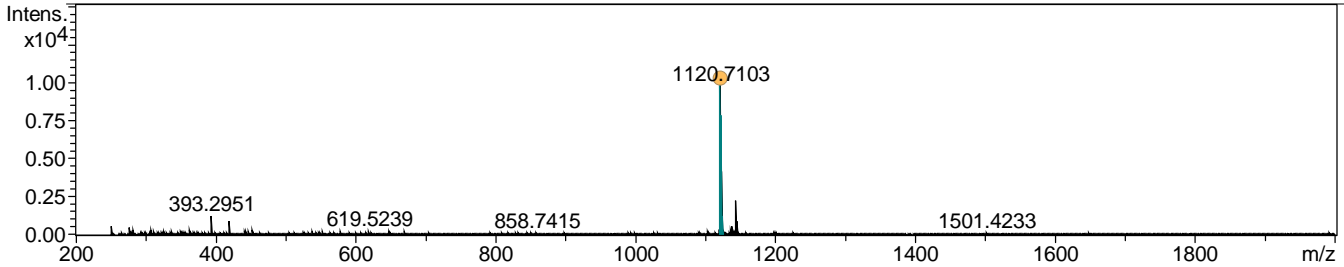

| Meas. m/z | # | Ion Formula | m/z       | err [mDa] | err [ppm] | mSigma | Score  | rdb  | e <sup>-</sup> Conf | N-Rule |
|-----------|---|-------------|-----------|-----------|-----------|--------|--------|------|---------------------|--------|
| 1120.7103 | 1 | C72H98NO7S  | 1120.7059 | 4.5       | 4.0       | 29.0   | 100.00 | 24.5 | even                | ok     |

### +MS, 0.6-0.7min #35-41

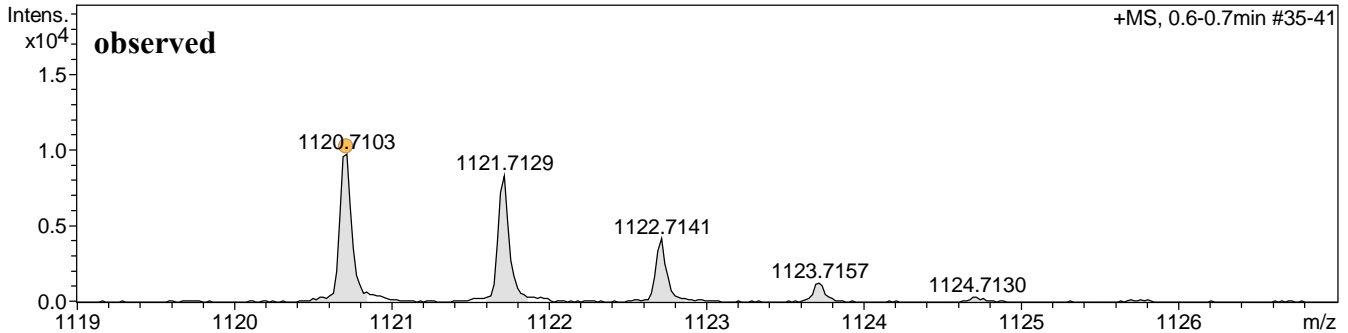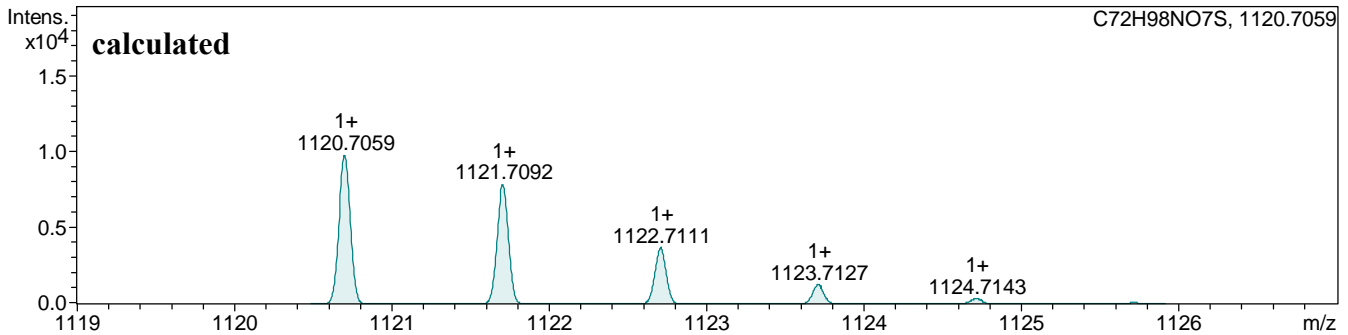

Figure S55  $^1\text{H}$  NMR Spectrum (400 MHz /  $\text{CDCl}_3$  / 298 K) of **14**

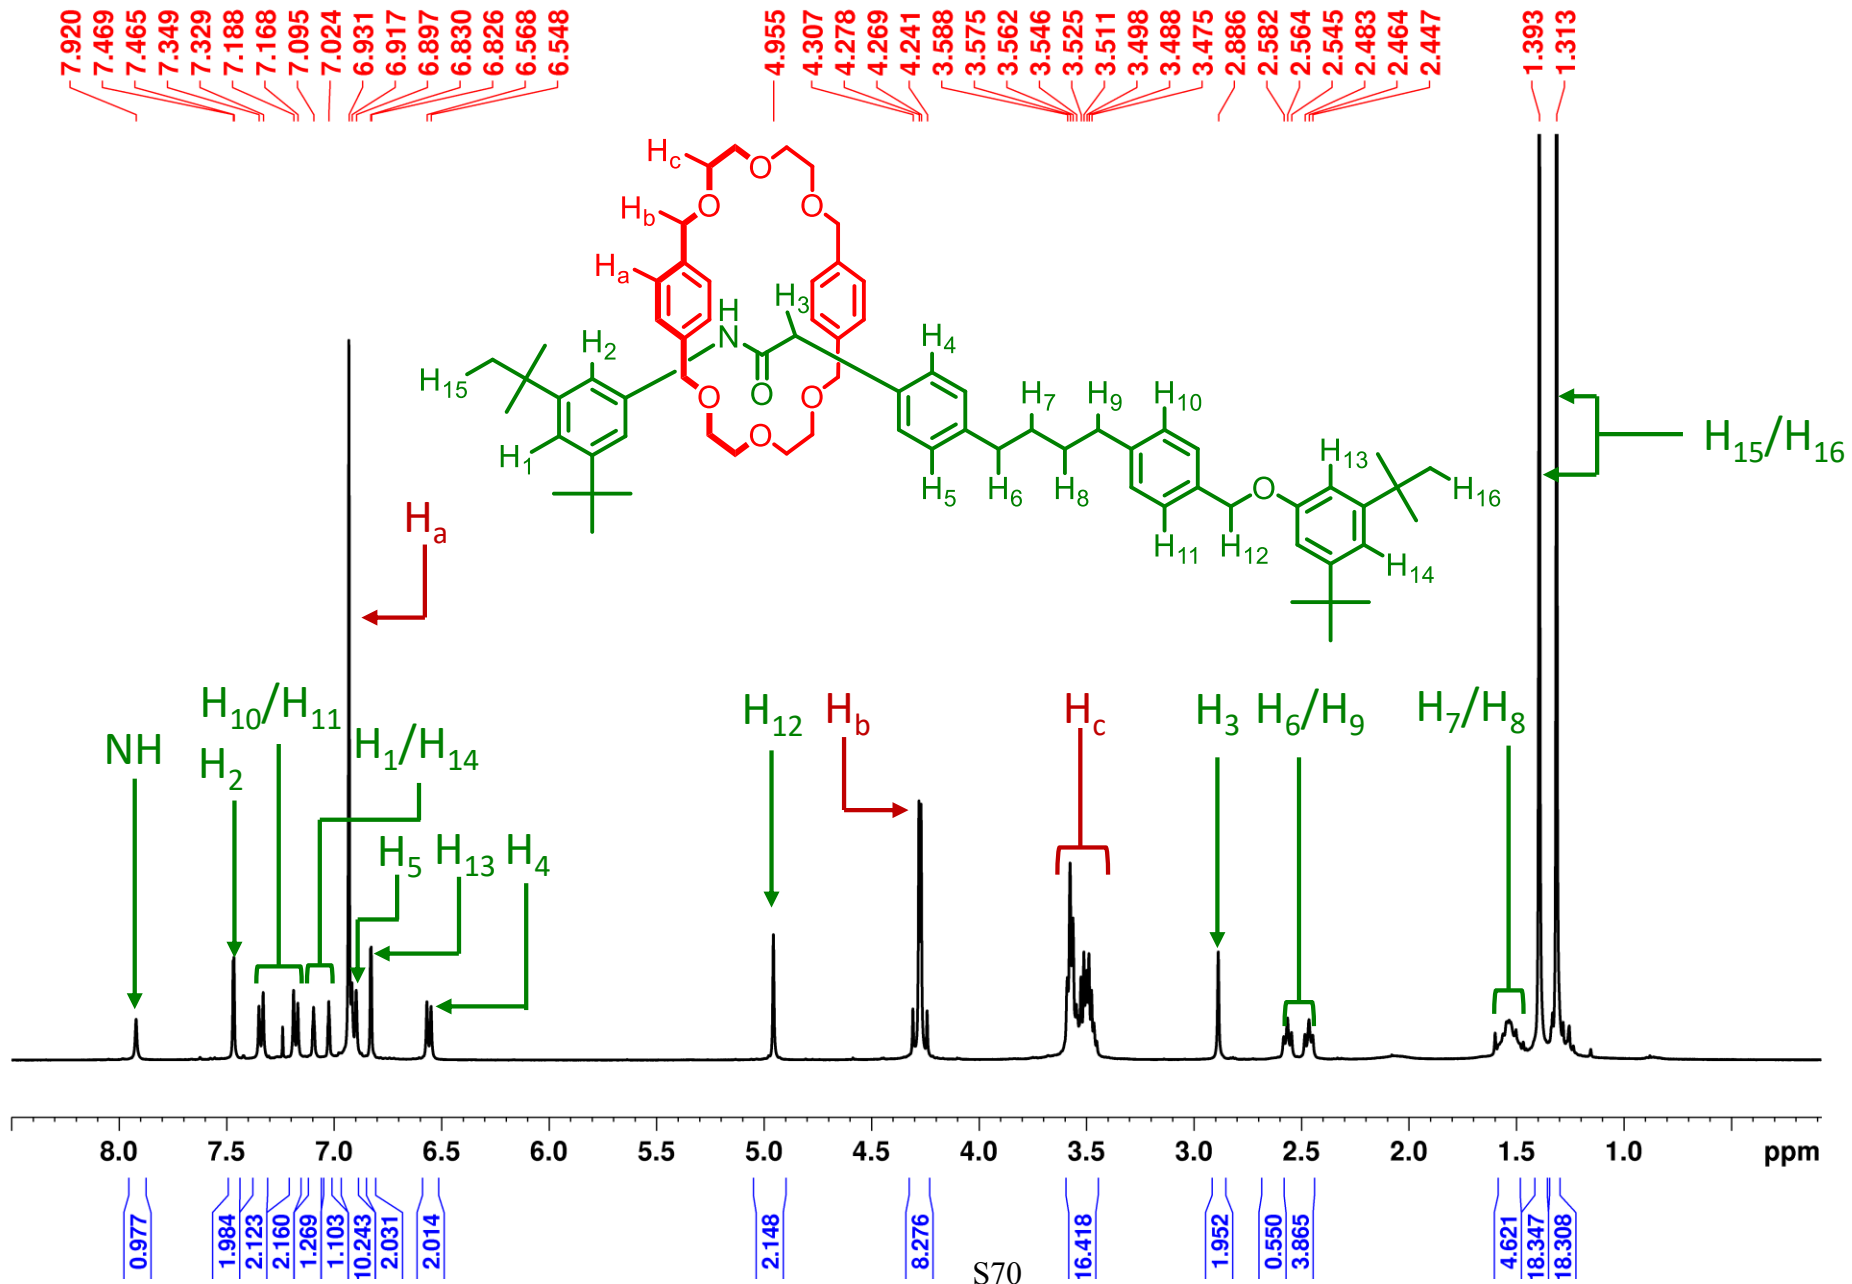

Figure S56  $^{13}\text{C}$  NMR Spectrum (100 MHz /  $\text{CDCl}_3$  / 298 K) of **14**

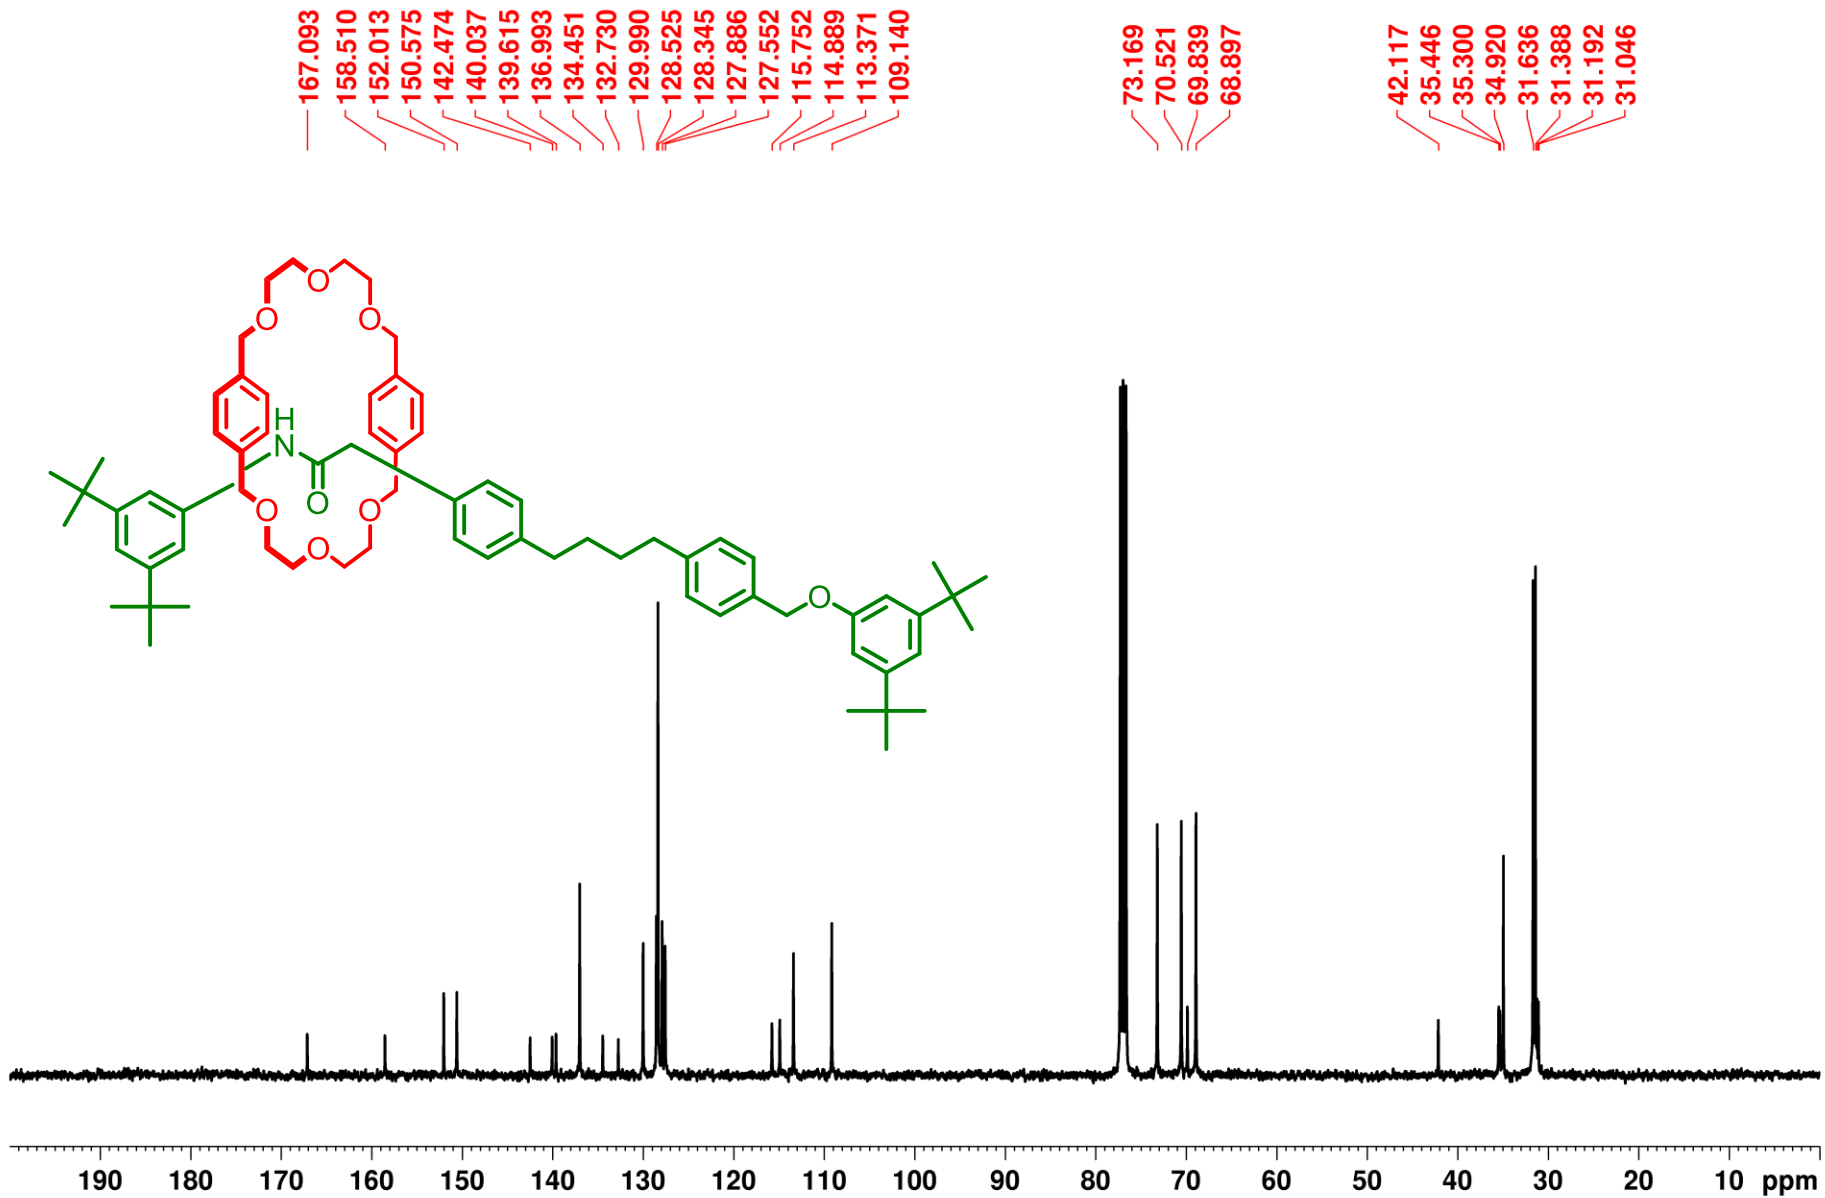

# Figure S57 ESI Mass Spectra of Compound 14

## Mass Spectrum SmartFormula Report

### Analysis Info

Analysis Name D:\Data\MS core facility\microTOF QII\Raw data\230711\230711\_amide-C4-rot-phenol\_pw\_1-90\_01\_54203.d  
Method tune\_wide\_pos\_LCMS\_with lock mass\_220107-3.m  
Sample Name 230711\_amide-C4-rot-phenol\_pw  
Comment

Acquisition Date 7/11/2023 1:06:03 PM

Operator Bruker microTOF-Q II

Instrument / Ser# microTOF-Q 10183

### Acquisition Parameter

|             |          |                       |           |                  |           |
|-------------|----------|-----------------------|-----------|------------------|-----------|
| Source Type | ESI      | Ion Polarity          | Positive  | Set Nebulizer    | 2.0 Bar   |
| Focus       | Active   | Set Capillary         | 4500 V    | Set Dry Heater   | 180 °C    |
| Scan Begin  | 50 m/z   | Set End Plate Offset  | -500 V    | Set Dry Gas      | 6.9 l/min |
| Scan End    | 3000 m/z | Set Collision Cell RF | 500.0 Vpp | Set Divert Valve | Waste     |

### +MS, 0.4-0.4min #(24-25)

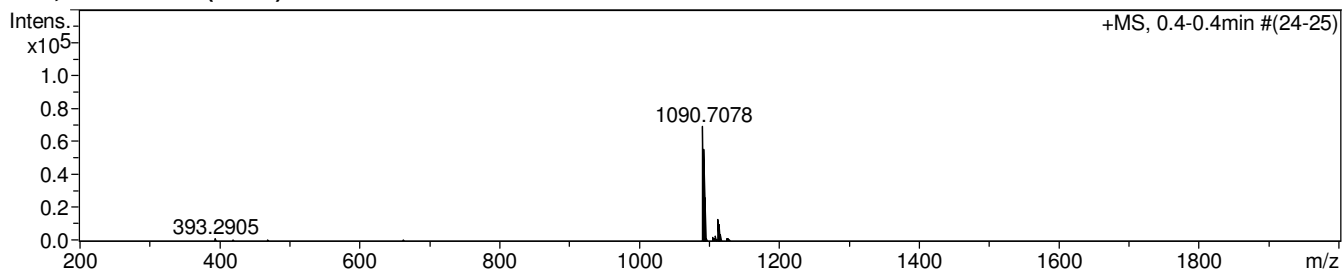

| Meas. m/z | # | Formula         | Score  | m/z       | err [mDa] | err [ppm] | mSigma | rdb  | e <sup>-</sup> Conf | N-Rule |
|-----------|---|-----------------|--------|-----------|-----------|-----------|--------|------|---------------------|--------|
| 1090.7078 | 1 | C 71 H 96 N O 8 | 100.00 | 1090.7130 | 5.3       | 4.8       | 29.9   | 24.5 | even                | ok     |

### +MS, 0.4-0.4min #(24-25)

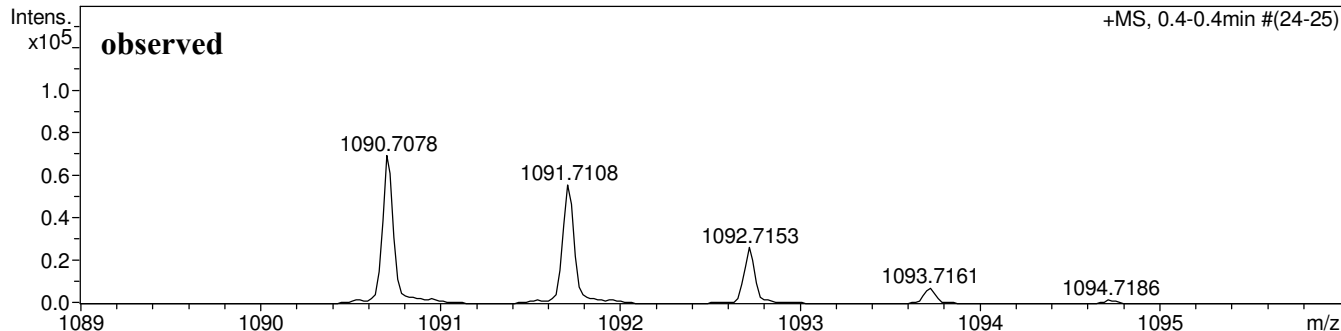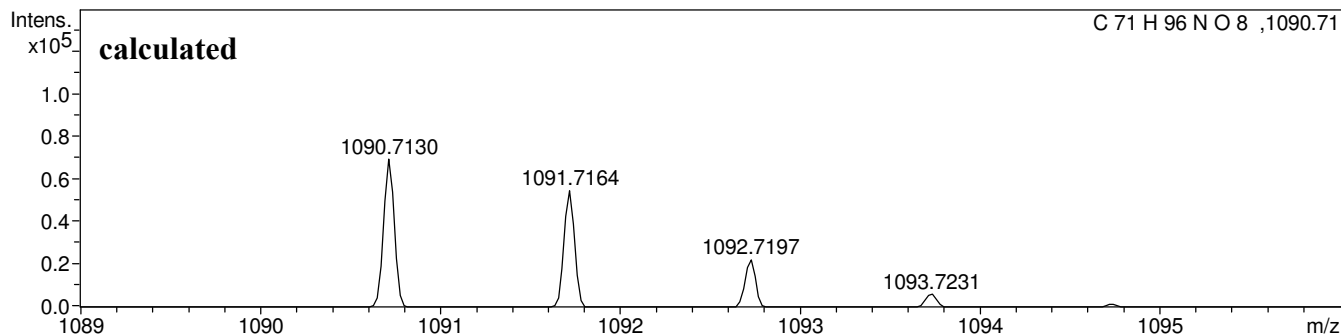



Figure S58 <sup>1</sup>H NMR Spectrum (400 MHz / CD<sub>2</sub>Cl<sub>2</sub> / 298 K) of **15**

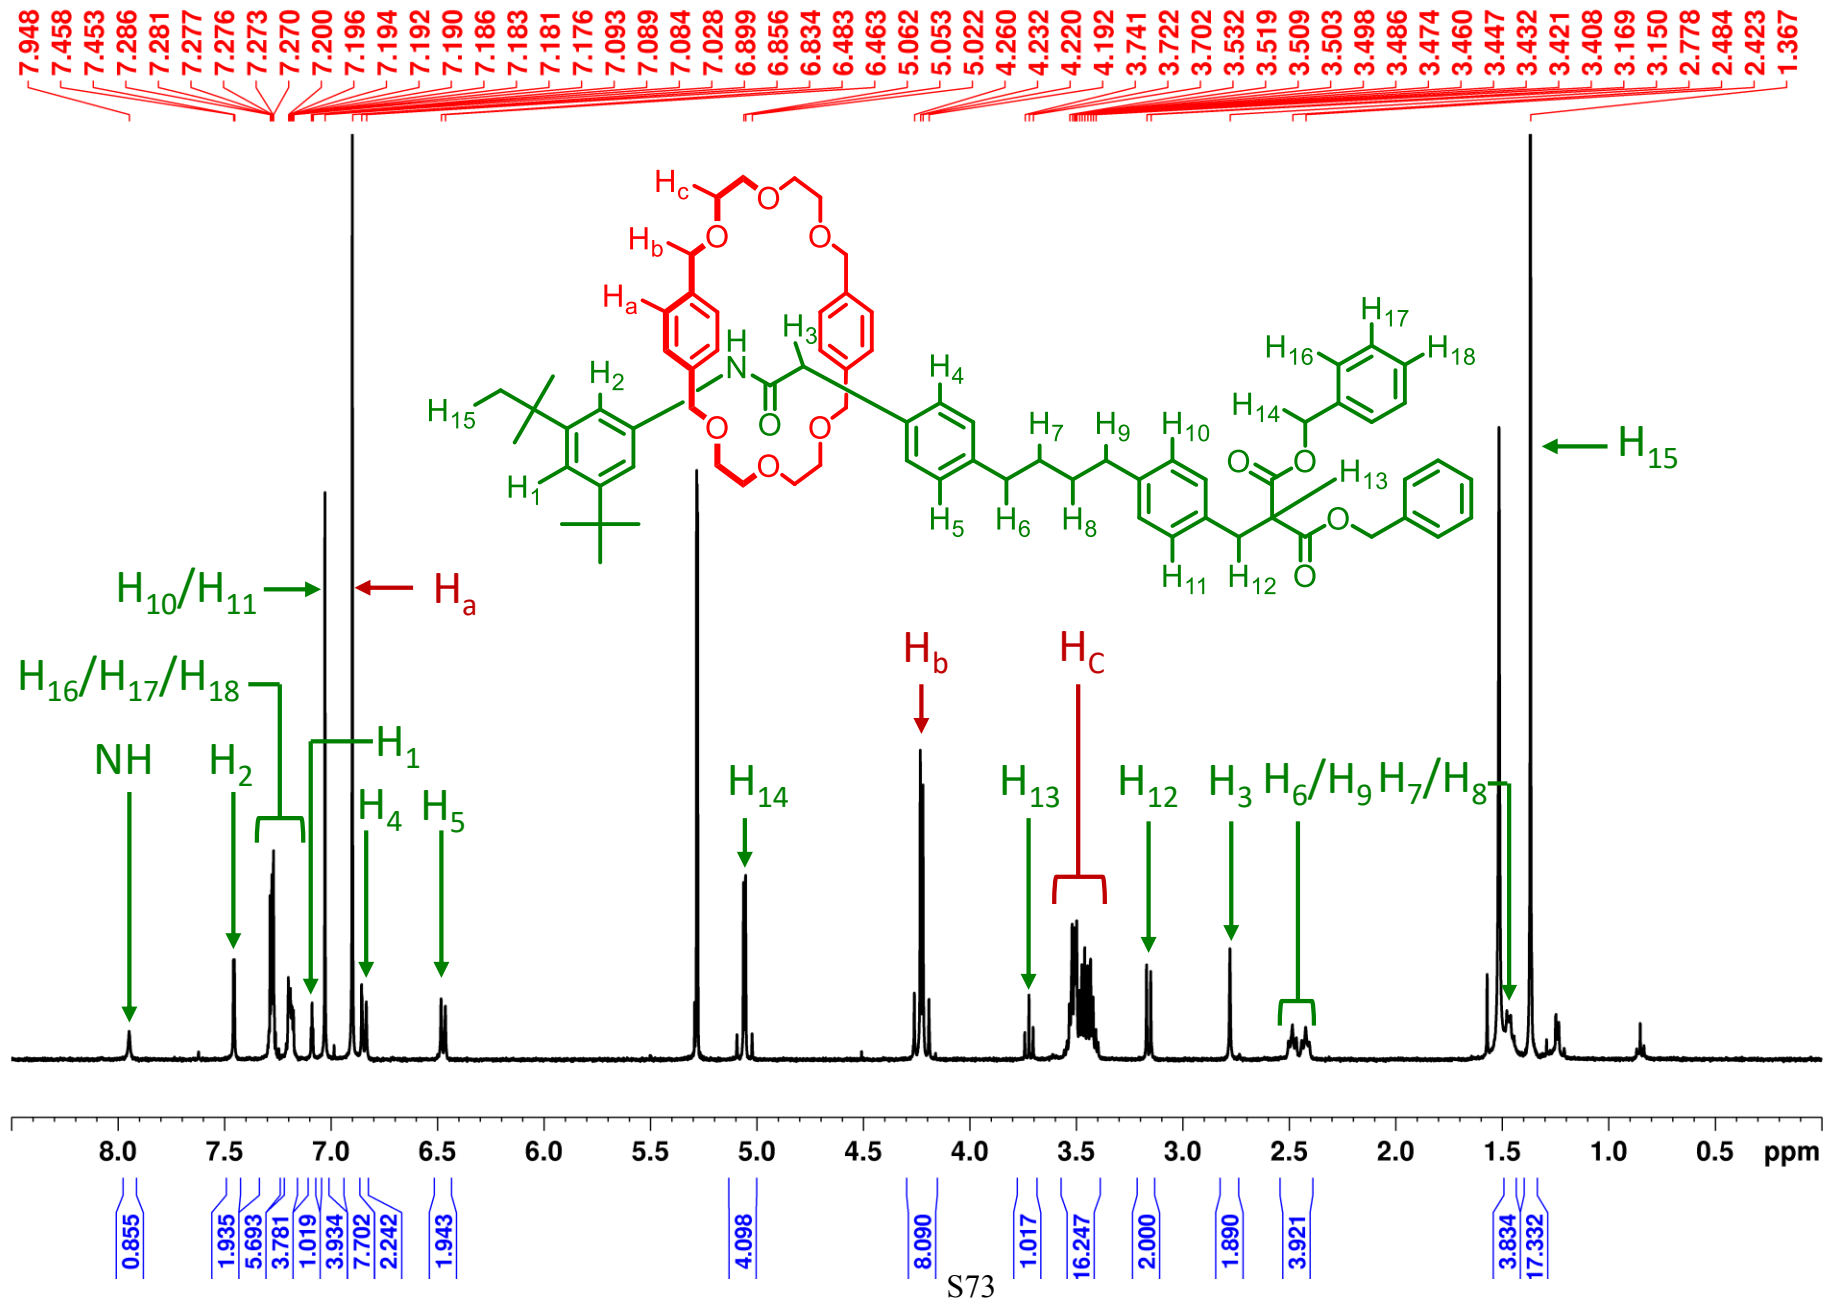

Figure S59  $^{13}\text{C}$  NMR Spectrum (100 MHz /  $\text{CD}_2\text{Cl}_2$  / 298 K) of Rotaxane **15**

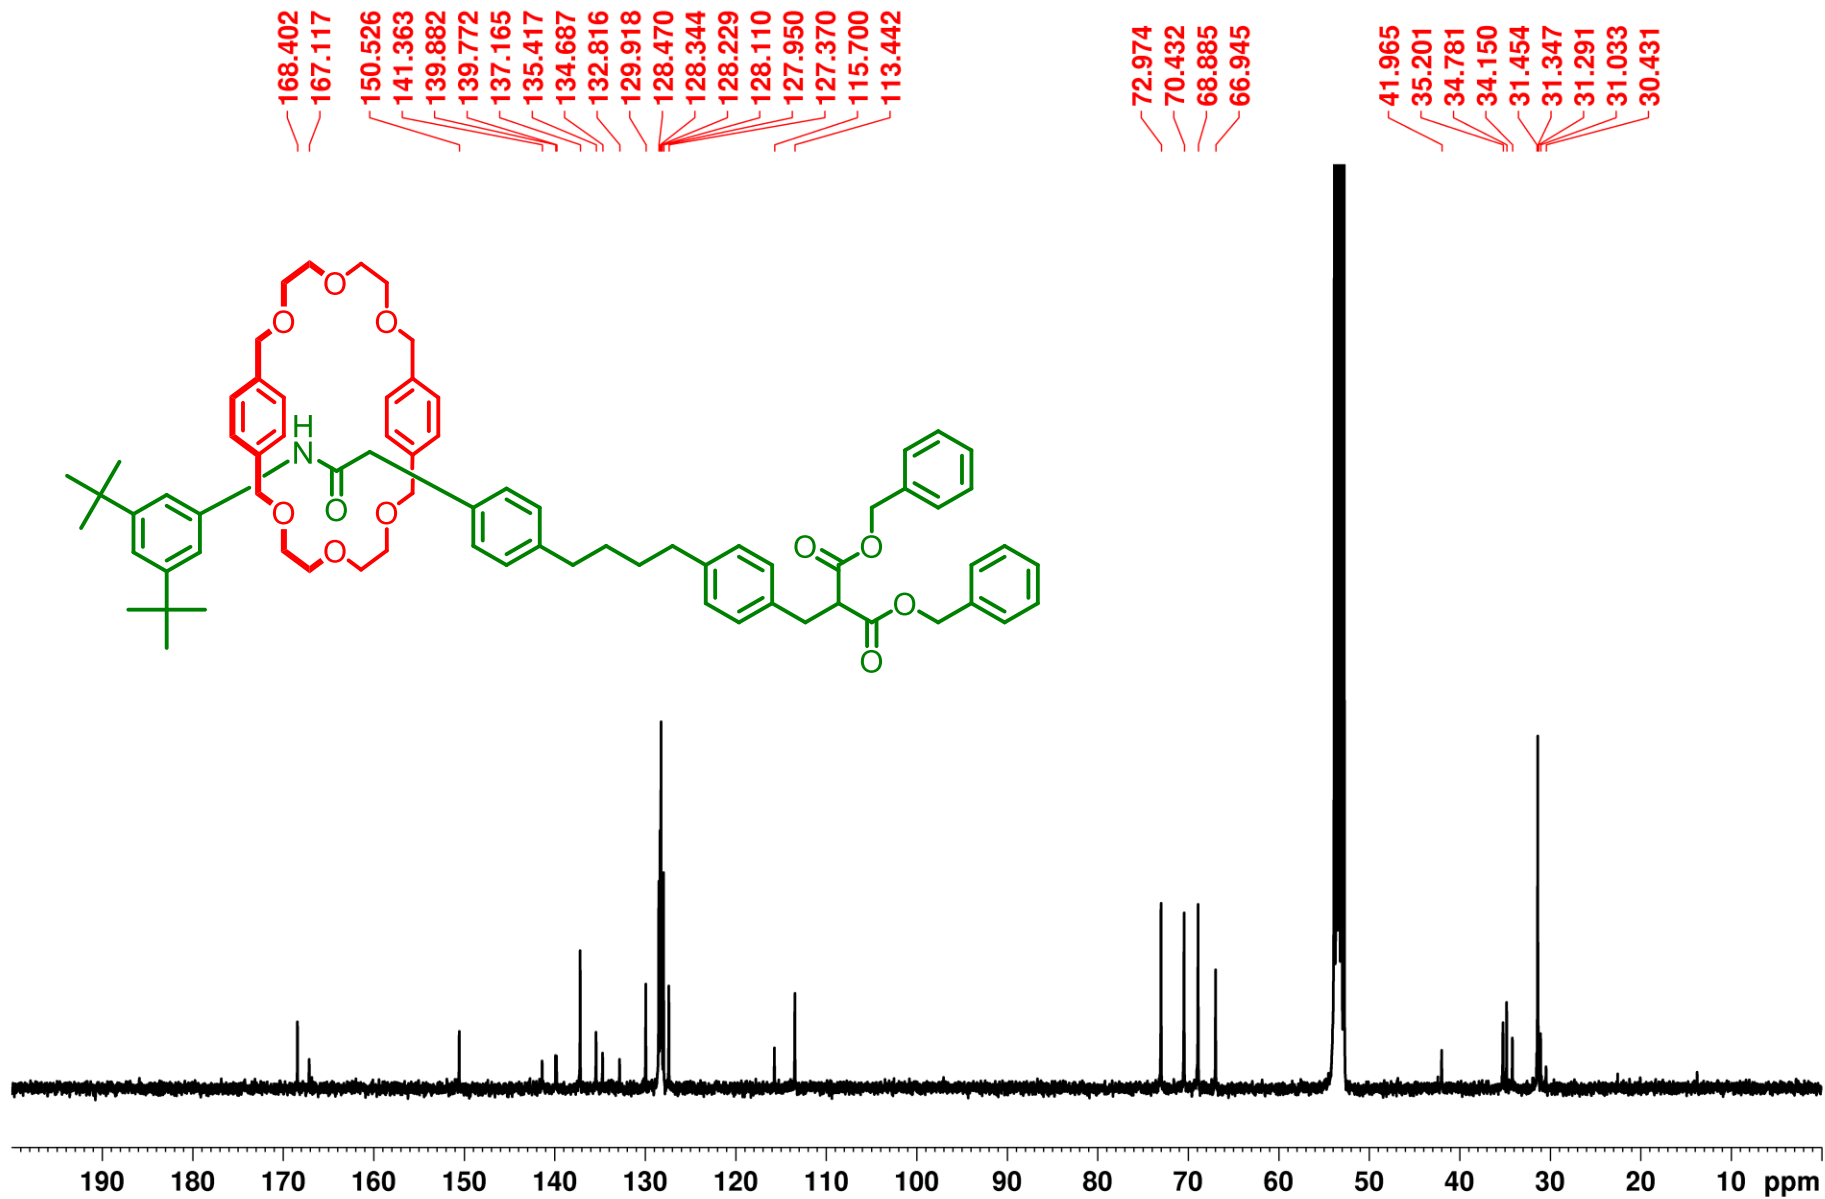

# Figure S60 ESI Mass Spectra of Compound 15

## Mass Spectrum SmartFormula Report

### Analysis Info

Analysis Name D:\Data\Fish\Data\2023Q3(datas)\230721\230721\_amide-C4-rot-malon\_pw\_1-59\_01\_54411.d  
Method tune\_wide\_pos\_LCMS\_with lock mass\_220107-3.m  
Sample Name 230721\_amide-C4-rot-malon\_pw  
Comment

Acquisition Date 7/21/2023 11:51:43 AM  
Operator Bruker microTOF-Q II  
Instrument / Ser# micrOTOF-Q 228888.10  
183

### Acquisition Parameter

|             |          |                       |           |                  |           |
|-------------|----------|-----------------------|-----------|------------------|-----------|
| Source Type | ESI      | Ion Polarity          | Positive  | Set Nebulizer    | 2.0 Bar   |
| Focus       | Active   | Set Capillary         | 4500 V    | Set Dry Heater   | 180 °C    |
| Scan Begin  | 50 m/z   | Set End Plate Offset  | -500 V    | Set Dry Gas      | 6.9 l/min |
| Scan End    | 3000 m/z | Set Collision Cell RF | 500.0 Vpp | Set Divert Valve | Waste     |

### +MS, 0.2-0.3min #13-18

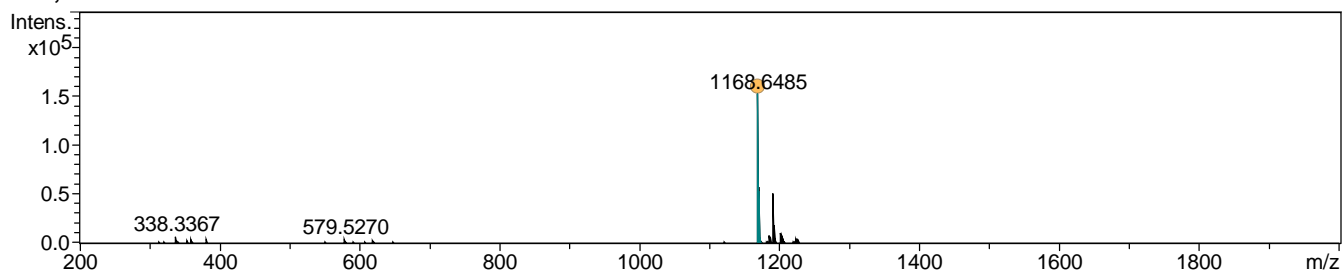

| Meas. m/z | # | Ion Formula | m/z       | err [mDa] | err [ppm] | mSigma | rdb  | e <sup>-</sup> Conf | N-Rule |
|-----------|---|-------------|-----------|-----------|-----------|--------|------|---------------------|--------|
| 1168.6485 | 1 | C74H90NO11  | 1168.6508 | 2.4       | 2.0       | 21.8   | 30.5 | even                | ok     |

### +MS, 0.2-0.3min #13-18

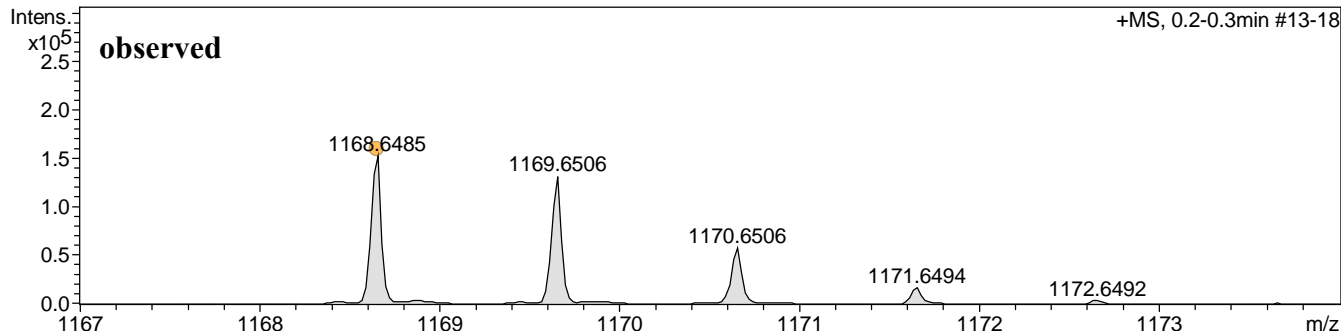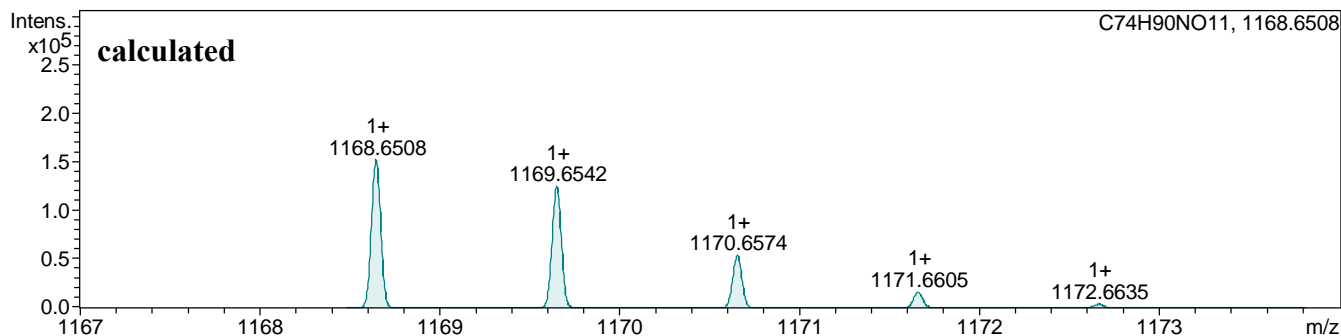

Figure S61 <sup>1</sup>H NMR Spectrum (400 MHz / CD<sub>2</sub>Cl<sub>2</sub> / 298 K) of Rotaxane **17**

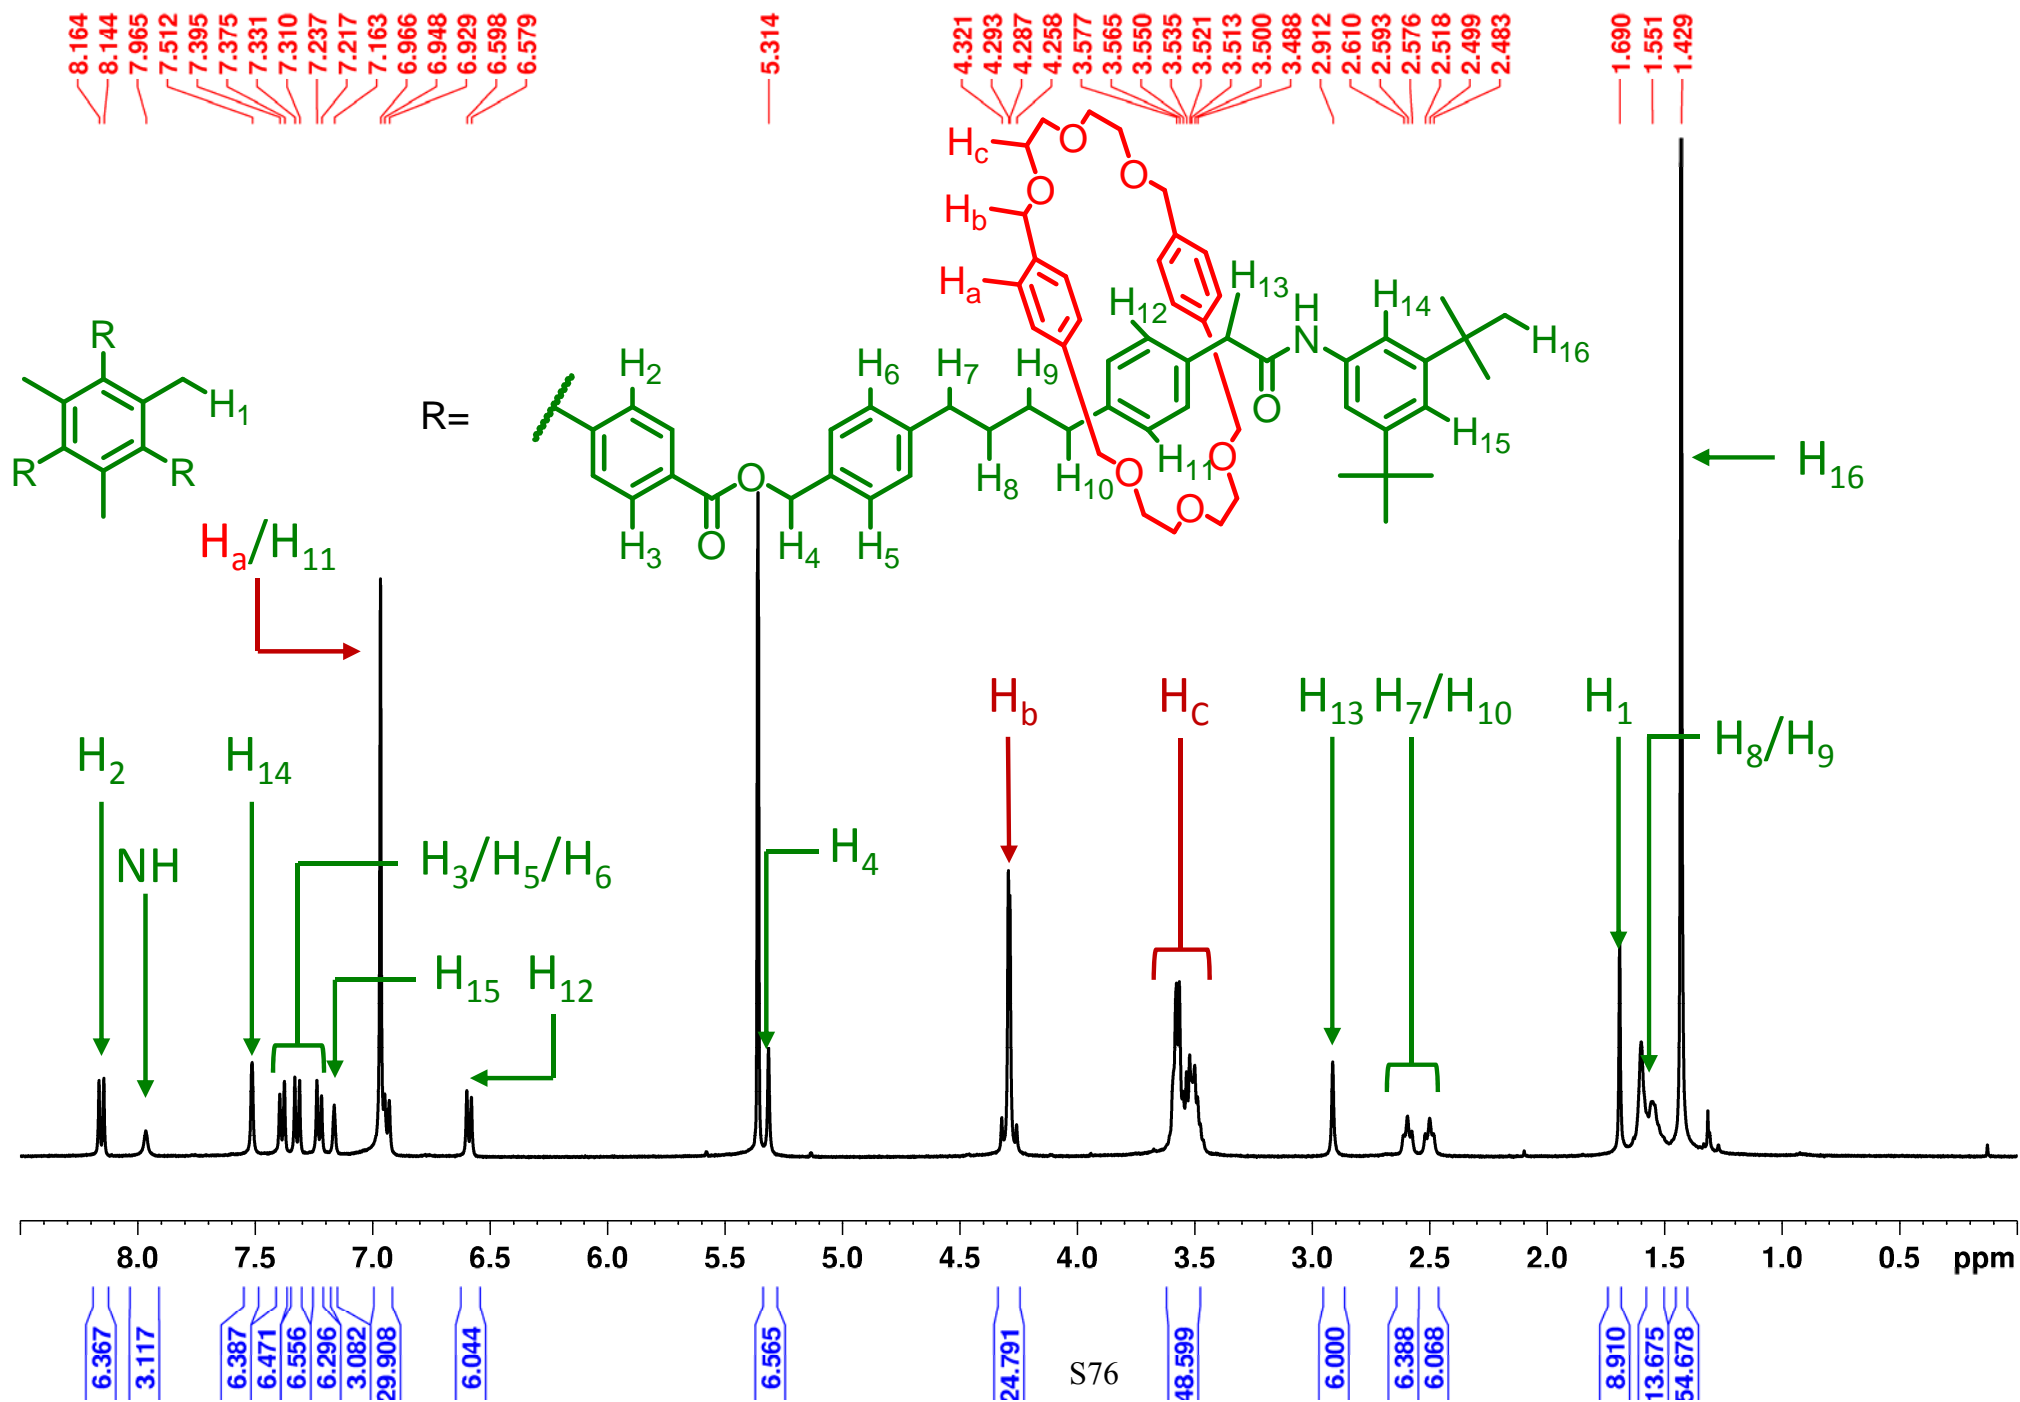

Figure S62  $^{13}\text{C}$  NMR Spectrum (100 MHz /  $\text{CD}_2\text{Cl}_2$  / 298 K) of Rotaxane **17**

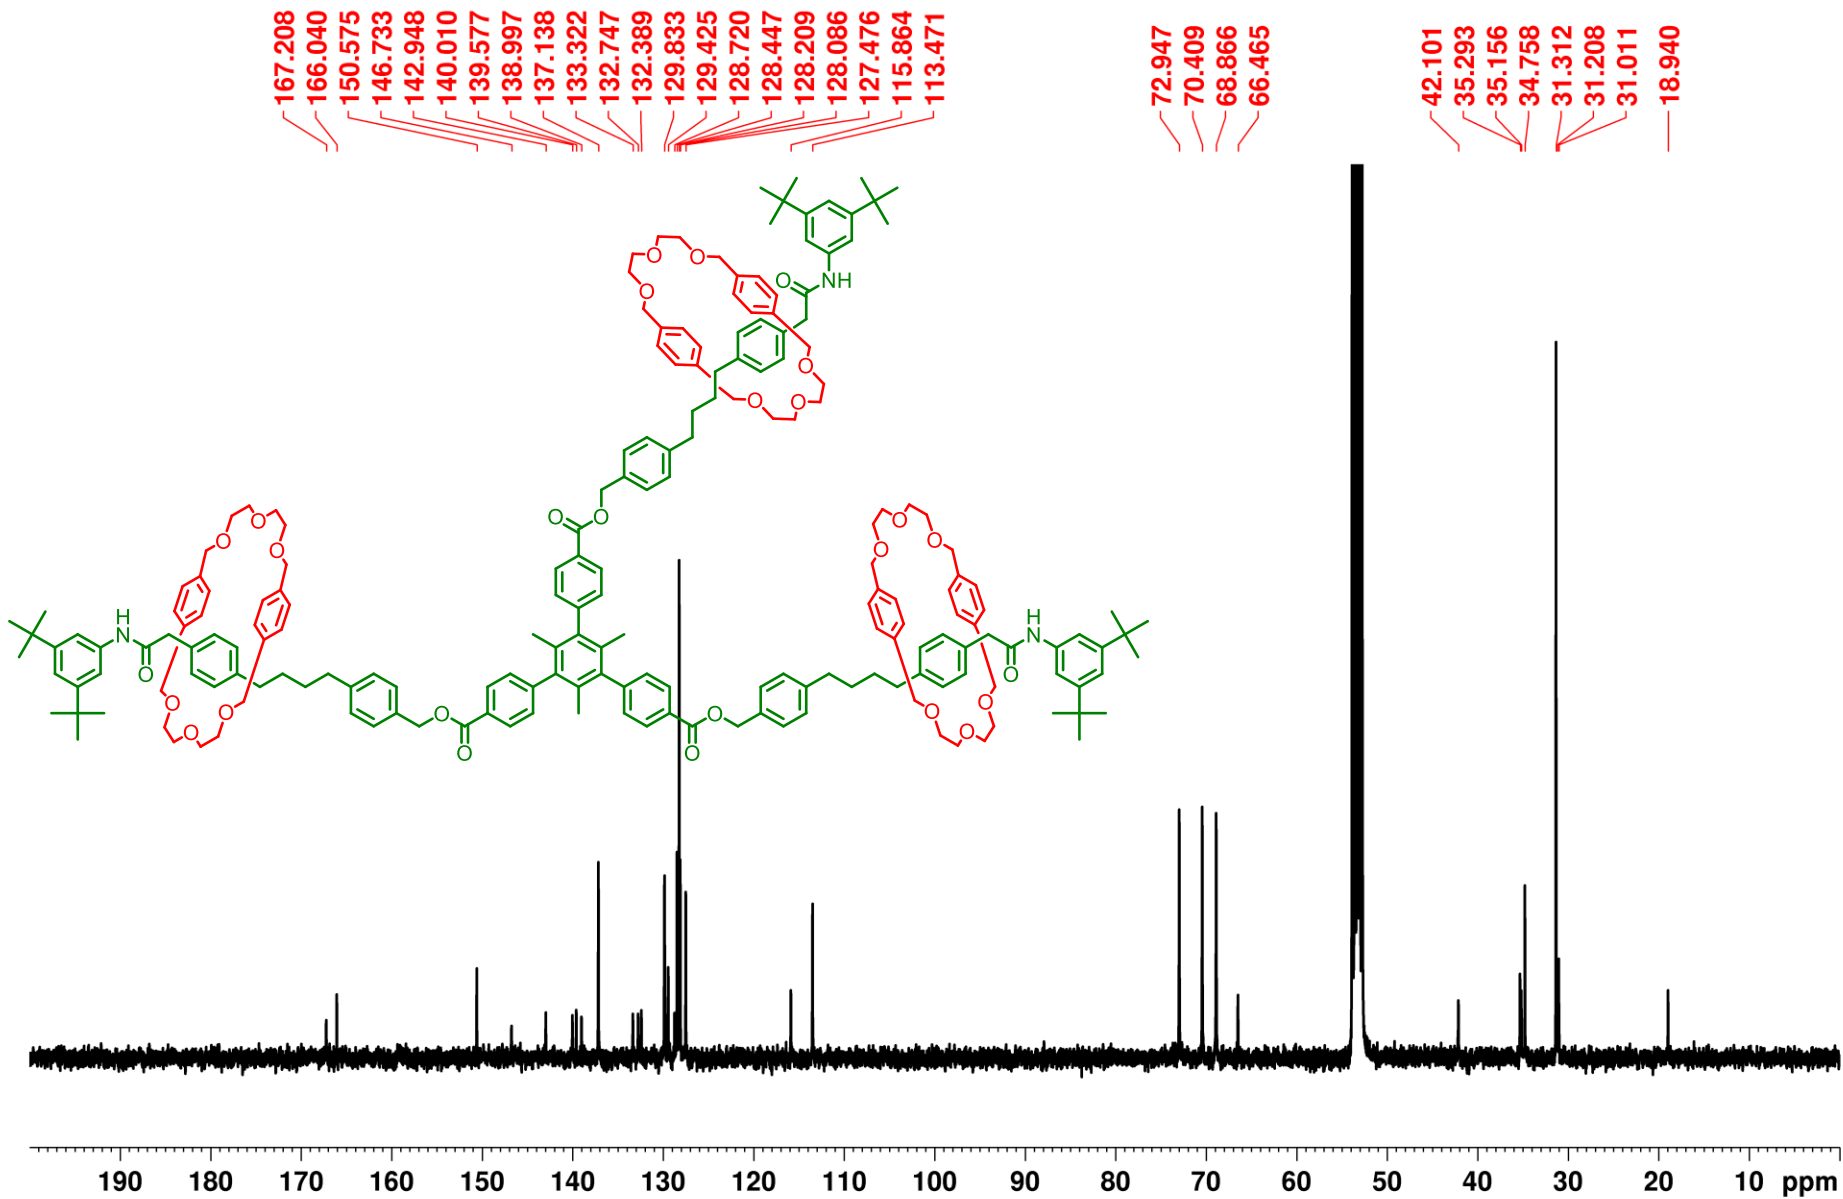

# Figure S63 ESI Mass Spectra of Compound 17

## Mass Spectrum SmartFormula Report

### Analysis Info

Analysis Name D:\Data\Fish\1\_Data\2024Q2\240430\240430\_4-rotaxane\_pw\_47\_01\_35772.d  
Method tune\_wide\_pos\_LCMS\_with lock mass\_220107-3.m  
Sample Name 240430\_4-rotaxane\_pw  
Comment

Acquisition Date 4/30/2024 3:45:32 PM  
Operator BDAL@DE  
Instrument / Ser# micrOTOF-Q 228888.10  
183

### Acquisition Parameter

|             |          |                       |           |                  |           |
|-------------|----------|-----------------------|-----------|------------------|-----------|
| Source Type | ESI      | Ion Polarity          | Positive  | Set Nebulizer    | 2.0 Bar   |
| Focus       | Active   | Set Capillary         | 4500 V    | Set Dry Heater   | 180 °C    |
| Scan Begin  | 50 m/z   | Set End Plate Offset  | -500 V    | Set Dry Gas      | 6.9 l/min |
| Scan End    | 3000 m/z | Set Collision Cell RF | 500.0 Vpp | Set Divert Valve | Waste     |

### +MS, 1.5min #91

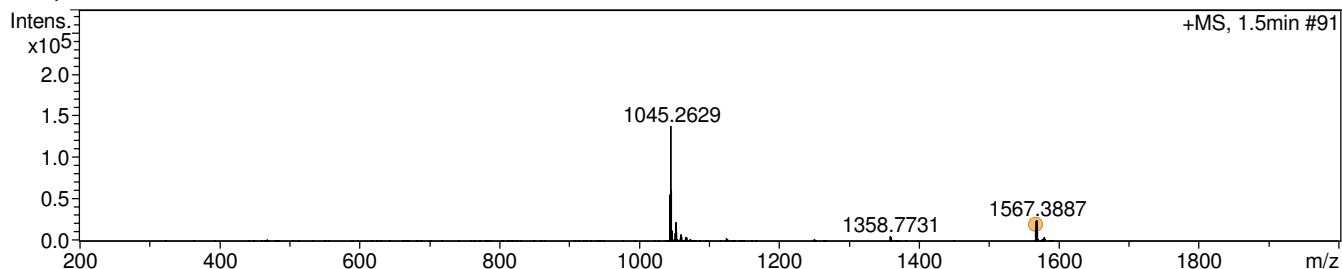

| Meas. m/z | # | Ion Formula   | m/z       | err [mDa] | err [ppm] | mSigma | Score  | rdb  | e <sup>-</sup> Conf | N-Rule |
|-----------|---|---------------|-----------|-----------|-----------|--------|--------|------|---------------------|--------|
| 1566.3865 | 1 | C201H245N3O27 | 1566.3940 | -7.5      | -4.8      | 31.5   | 100.00 | 81.0 | even                | ok     |

### +MS, 1.5min #91

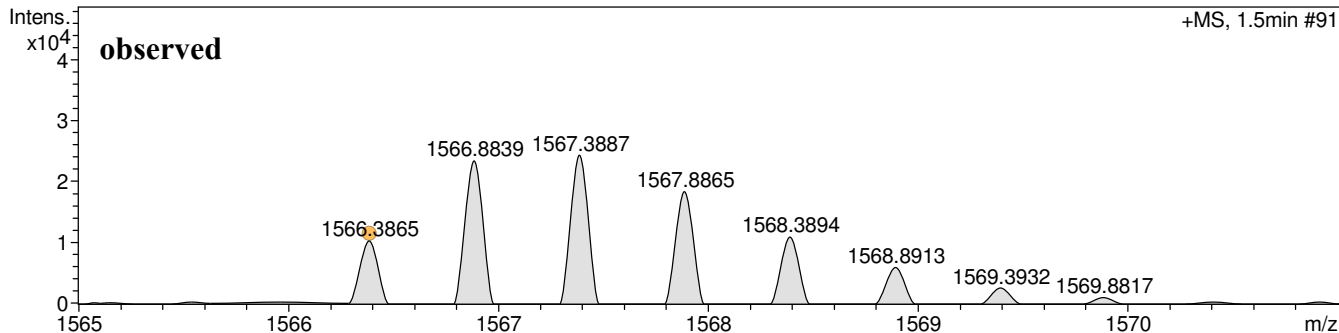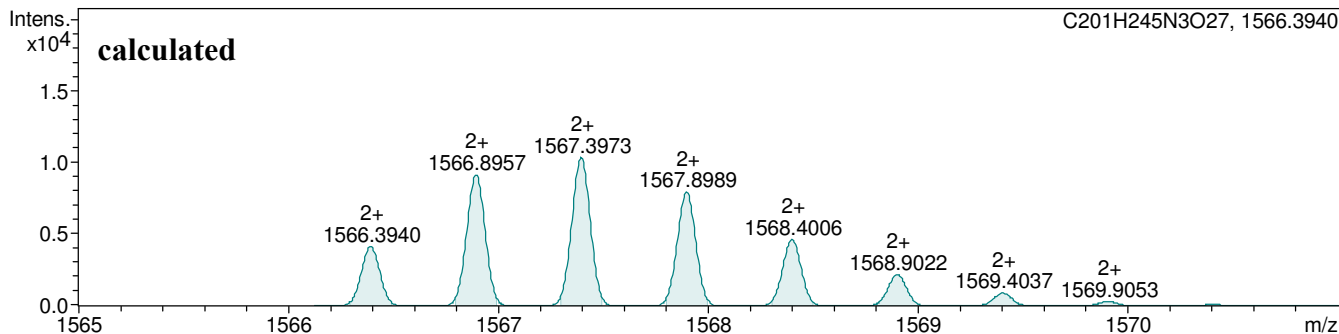

Supplement: d4cc02975e1.pdf [file d4cc02975e1.pdf]
